# Supplementary material for: Pyrosequencing the Bemisia tabaci Transcriptome Reveals a Highly Diverse Bacterial Community and a Robust System for Insecticide Resistance
Source: PLoS One. 2012 Apr 30;7(4):e35181. doi: 10.1371/journal.pone.0035181 (PMC3340392; doi:10.1371/journal.pone.0035181)
Supplement: Table S3 — Gene ontology of B. tabaci transcriptome. (XLSX) [file pone.0035181.s008.xlsx]

## Sheet: Sheet1
Table S3 Gene ontology of B. tabaci transcriptome.
geneID	GO
2.0_INSECT_GG3J73P03GG03R	GO:0008152	GO:0016747	GO:0009055
2.0_INSECT_GG3J73P03GG19G	GO:0009055	GO:0005576	GO:0051536	GO:0005515	GO:0008152	GO:0016747	GO:0004872	GO:0005488	GO:0007155	GO:0007160	GO:0007229	GO:0008305	GO:0016068	GO:0046872
2.0_INSECT_GG3J73P03GG1GN	GO:0008152	GO:0016747	GO:0009055	GO:0005515	GO:0005525	GO:0005874	GO:0007017	GO:0051536	GO:0004872	GO:0005488	GO:0007155	GO:0007160	GO:0007229	GO:0008305	GO:0005576	GO:0006952
2.0_INSECT_GG3J73P03GG31S	GO:0009055	GO:0051536	GO:0005576	GO:0005515	GO:0008152	GO:0016747
2.0_INSECT_GG3J73P03GG4KD	GO:0005515	GO:0009055	GO:0008152	GO:0016747	GO:0005525	GO:0005874	GO:0007017	GO:0005576	GO:0006952	GO:0004872	GO:0005488	GO:0007155	GO:0007160	GO:0007229	GO:0008305
2.0_INSECT_GG3J73P03GG4N4	GO:0009055	GO:0005515	GO:0051536	GO:0005576	GO:0006952
2.0_INSECT_GG3J73P03GG4QS	GO:0008152	GO:0016747	GO:0009055	GO:0005576	GO:0051536	GO:0005515	GO:0004872	GO:0005488	GO:0007155	GO:0007160	GO:0007229	GO:0008305	GO:0005525	GO:0005874	GO:0007017	GO:0016068	GO:0001558	GO:0005520
2.0_INSECT_GG3J73P03GG4ZI	GO:0008152	GO:0016747	GO:0009055	GO:0005576	GO:0005515
2.0_INSECT_GG3J73P03GG58J	GO:0005525	GO:0005874	GO:0007017	GO:0008152	GO:0016747	GO:0009055	GO:0005515	GO:0051536	GO:0005576	GO:0006952	GO:0004872	GO:0005488	GO:0007155	GO:0007160	GO:0007229	GO:0008305
2.0_INSECT_GG3J73P03GG5I6	GO:0008152	GO:0016747	GO:0009055	GO:0005515	GO:0051536	GO:0004872	GO:0005488	GO:0007155	GO:0007160	GO:0007229	GO:0008305	GO:0005576	GO:0006952	GO:0005525	GO:0005874	GO:0007017
2.0_INSECT_GG3J73P03GG5OR	GO:0009055	GO:0004872	GO:0005488	GO:0007155	GO:0007160	GO:0007229	GO:0008305	GO:0005515
2.0_INSECT_GG3J73P03GG5RE	GO:0008152	GO:0016747	GO:0009055	GO:0005525	GO:0005874	GO:0007017	GO:0005576	GO:0006952	GO:0005515
2.0_INSECT_GG3J73P03GG69R	GO:0008152	GO:0016747	GO:0009055	GO:0005515	GO:0051536	GO:0005199	GO:0009277	GO:0005576	GO:0006952	GO:0005525	GO:0005874	GO:0007017	GO:0004872	GO:0005488	GO:0007155	GO:0007160	GO:0007229	GO:0008305
2.0_INSECT_GG3J73P03GG6A4	GO:0009055	GO:0051536
2.0_INSECT_GG3J73P03GG6BX	GO:0005576	GO:0005515	GO:0008152	GO:0016747	GO:0009055	GO:0006952	GO:0051536	GO:0005525	GO:0005874	GO:0007017
2.0_INSECT_GG3J73P03GG6NR	GO:0046872	GO:0009055	GO:0051536	GO:0005576	GO:0005515
2.0_INSECT_GG3J73P03GG6X0	GO:0009055
2.0_INSECT_GG3J73P03GG7FI	GO:0009055	GO:0051536	GO:0004872	GO:0005488	GO:0007155	GO:0007160	GO:0007229	GO:0008305	GO:0005576	GO:0005515	GO:0009755
2.0_INSECT_GG3J73P03GG7L3	GO:0009055	GO:0051536	GO:0004872	GO:0005488	GO:0007155	GO:0007160	GO:0007229	GO:0008305	GO:0005576	GO:0005515
2.0_INSECT_GG3J73P03GG7U9	GO:0008152	GO:0016747	GO:0009055	GO:0005515	GO:0005576	GO:0006952	GO:0051536	GO:0005525	GO:0005874	GO:0007017
2.0_INSECT_GG3J73P03GG8DC	GO:0009055	GO:0005576	GO:0005515	GO:0005525	GO:0005874	GO:0007017	GO:0008152	GO:0016747	GO:0051536	GO:0006952	GO:0042309	GO:0050825	GO:0050826
2.0_INSECT_GG3J73P03GG8GE	GO:0009055	GO:0051536	GO:0005515	GO:0004872	GO:0005488	GO:0007155	GO:0007160	GO:0007229	GO:0008305	GO:0005576	GO:0008152	GO:0016747	GO:0006952	GO:0016068
2.0_INSECT_GG3J73P03GG8HM	GO:0009055
2.0_INSECT_GG3J73P03GG8KI	GO:0009055	GO:0051536	GO:0005576	GO:0005515	GO:0008152	GO:0016747	GO:0004872	GO:0005488	GO:0007155	GO:0007160	GO:0007229	GO:0008305	GO:0006952	GO:0016068	GO:0005525	GO:0005874	GO:0007017	GO:0005199	GO:0009277
2.0_INSECT_GG3J73P03GG95U	GO:0009055
2.0_INSECT_GG3J73P03GGAFV	GO:0009055
2.0_INSECT_GG3J73P03GGATF	GO:0009055	GO:0005515	GO:0005576	GO:0006952	GO:0009405	GO:0009755	GO:0008152	GO:0016747	GO:0005525	GO:0005874	GO:0007017	GO:0051536	GO:0005199	GO:0009277
2.0_INSECT_GG3J73P03GGBXG	GO:0009055	GO:0051536	GO:0004872	GO:0005488	GO:0007155	GO:0007160	GO:0007229	GO:0008305	GO:0005576	GO:0005515	GO:0008152	GO:0016747	GO:0005525	GO:0005874	GO:0007017	GO:0006952	GO:0016068
2.0_INSECT_GG3J73P03GGC10	GO:0008152	GO:0016747	GO:0005515	GO:0009055	GO:0005576
2.0_INSECT_GG3J73P03GGD6Q	GO:0005515	GO:0008152	GO:0016747	GO:0009055
2.0_INSECT_GG3J73P03GGD82	GO:0009055	GO:0005576	GO:0005515	GO:0008152	GO:0016747	GO:0051536	GO:0005199	GO:0009277	GO:0006952	GO:0004872	GO:0005488	GO:0007155	GO:0007160	GO:0007229	GO:0008305
2.0_INSECT_GG3J73P03GGDKZ	GO:0008152	GO:0016747	GO:0009055	GO:0005576	GO:0005515	GO:0005525	GO:0005874	GO:0007017	GO:0004872	GO:0005488	GO:0007155	GO:0007160	GO:0007229	GO:0008305	GO:0051536	GO:0006952
2.0_INSECT_GG3J73P03GGELH	GO:0009055	GO:0005576	GO:0008152	GO:0016747	GO:0005515	GO:0051536	GO:0004872	GO:0005488	GO:0007155	GO:0007160	GO:0007229	GO:0008305	GO:0006952	GO:0005525	GO:0005874	GO:0007017	GO:0005199	GO:0009277
2.0_INSECT_GG3J73P03GGF06	GO:0009055	GO:0005515	GO:0005576	GO:0051536	GO:0008152	GO:0016747	GO:0005525	GO:0005874	GO:0007017
2.0_INSECT_GG3J73P03GGGWJ	GO:0009055
2.0_INSECT_GG3J73P03GGI18	GO:0008152	GO:0016747	GO:0009055	GO:0051536	GO:0005515	GO:0005525	GO:0005874	GO:0007017	GO:0005576	GO:0004872	GO:0005488	GO:0007155	GO:0007160	GO:0007229	GO:0008305	GO:0006952
2.0_INSECT_GG3J73P03GGI98	GO:0009055	GO:0004872	GO:0005488	GO:0007155	GO:0007160	GO:0007229	GO:0008305	GO:0005515	GO:0051536
2.0_INSECT_GG3J73P03GGIAU	GO:0009055	GO:0005576	GO:0005515	GO:0008152	GO:0016747	GO:0051536
2.0_INSECT_GG3J73P03GGIGC	GO:0008152	GO:0016747	GO:0009055	GO:0005576	GO:0005515	GO:0004872	GO:0005488	GO:0007155	GO:0007160	GO:0007229	GO:0008305	GO:0051536	GO:0005525	GO:0005874	GO:0007017	GO:0006952
2.0_INSECT_GG3J73P03GGIRH	GO:0005576	GO:0005515
2.0_INSECT_GG3J73P03GGJ3Z	GO:0009055
2.0_INSECT_GG3J73P03GGJT8	GO:0008152	GO:0016747	GO:0005576	GO:0006952	GO:0004872	GO:0005488	GO:0007155	GO:0007160	GO:0007229	GO:0008305	GO:0005515	GO:0009055	GO:0051536	GO:0005525	GO:0005874	GO:0007017
2.0_INSECT_GG3J73P03GGJXN	GO:0009055	GO:0051536	GO:0005515	GO:0005576	GO:0008152	GO:0016747	GO:0004872	GO:0005488	GO:0007155	GO:0007160	GO:0007229	GO:0008305	GO:0006952	GO:0005525	GO:0005874	GO:0007017
2.0_INSECT_GG3J73P03GGK1T	GO:0009055	GO:0051536	GO:0005515	GO:0005576	GO:0008152	GO:0016747	GO:0005525	GO:0005874	GO:0007017	GO:0004872	GO:0005488	GO:0007155	GO:0007160	GO:0007229	GO:0008305
2.0_INSECT_GG3J73P03GGKB2	GO:0008152	GO:0016747	GO:0009055	GO:0005515	GO:0046872
2.0_INSECT_GG3J73P03GGKUA	GO:0009055	GO:0005515	GO:0005576
2.0_INSECT_GG3J73P03GGKZJ	GO:0005525	GO:0005874	GO:0007017	GO:0005576	GO:0005515
2.0_INSECT_GG3J73P03GGL7J	GO:0009055	GO:0051536	GO:0005515	GO:0008152	GO:0016747	GO:0005576	GO:0006952
2.0_INSECT_GG3J73P03GGMD9	GO:0009055	GO:0005515	GO:0051536	GO:0005525	GO:0005874	GO:0007017	GO:0004872	GO:0005488	GO:0007155	GO:0007160	GO:0007229	GO:0008305	GO:0005576	GO:0006952
2.0_INSECT_GG3J73P03GGMHV	GO:0009055
2.0_INSECT_GG3J73P03GGNOC	GO:0008152	GO:0016747	GO:0009055	GO:0051536	GO:0005576	GO:0005515	GO:0006952	GO:0004872	GO:0005488	GO:0007155	GO:0007160	GO:0007229	GO:0008305	GO:0009755	GO:0005199	GO:0009277	GO:0003735	GO:0005622	GO:0005840	GO:0006412	GO:0046872
2.0_INSECT_GG3J73P03GGO2I	GO:0005515	GO:0009055	GO:0008152	GO:0016747	GO:0005576	GO:0005525	GO:0005874	GO:0007017	GO:0051536
2.0_INSECT_GG3J73P03GGO2Q	GO:0009055	GO:0005515	GO:0004872	GO:0005488	GO:0007155	GO:0007160	GO:0007229	GO:0008305	GO:0005576	GO:0008152	GO:0016747	GO:0051536	GO:0006952	GO:0005525	GO:0005874	GO:0007017	GO:0016068
2.0_INSECT_GG3J73P03GGO7W	GO:0009055	GO:0005576	GO:0005515	GO:0016068	GO:0008152	GO:0016747	GO:0051536	GO:0006952	GO:0004872	GO:0005488	GO:0007155	GO:0007160	GO:0007229	GO:0008305	GO:0005525	GO:0005874	GO:0007017
2.0_INSECT_GG3J73P03GGOJ1	GO:0008152	GO:0016747	GO:0009055	GO:0005576	GO:0006952	GO:0051536	GO:0005515	GO:0005525	GO:0005874	GO:0007017
2.0_INSECT_GG3J73P03GGOM7	GO:0005515	GO:0009055	GO:0004872	GO:0005488	GO:0007155	GO:0007160	GO:0007229	GO:0008305	GO:0005576	GO:0006952	GO:0008152	GO:0016747	GO:0051536
2.0_INSECT_GG3J73P03GGRUA	GO:0009055	GO:0005576
2.0_INSECT_GG3J73P03GGSA6	GO:0009055	GO:0005576	GO:0005515	GO:0008152	GO:0016747	GO:0051536	GO:0004872	GO:0005488	GO:0007155	GO:0007160	GO:0007229	GO:0008305	GO:0006952	GO:0005525	GO:0005874	GO:0007017
2.0_INSECT_GG3J73P03GGSD9	GO:0009055	GO:0008152	GO:0016747	GO:0005515
2.0_INSECT_GG3J73P03GGSFT	GO:0005525	GO:0005874	GO:0007017	GO:0009055
2.0_INSECT_GG3J73P03GGSKV	GO:0009055	GO:0005576
2.0_INSECT_GG3J73P03GGSUB	GO:0009055	GO:0005576	GO:0005515	GO:0008152	GO:0016747	GO:0051536	GO:0004872	GO:0005488	GO:0007155	GO:0007160	GO:0007229	GO:0008305	GO:0006952	GO:0005525	GO:0005874	GO:0007017	GO:0005199	GO:0009277
2.0_INSECT_GG3J73P03GGT81	GO:0009055	GO:0005576	GO:0006952	GO:0005515	GO:0051536	GO:0004872	GO:0005488	GO:0007155	GO:0007160	GO:0007229	GO:0008305	GO:0008152	GO:0016747	GO:0005525	GO:0005874	GO:0007017
2.0_INSECT_GG3J73P03GGTGB	GO:0009055
2.0_INSECT_GG3J73P03GGULE	GO:0008152	GO:0016747	GO:0005576
2.0_INSECT_GG3J73P03GGUV6	GO:0009055	GO:0005576	GO:0006952	GO:0005515	GO:0005525	GO:0005874	GO:0007017	GO:0051536	GO:0008152	GO:0016747
2.0_INSECT_GG3J73P03GGUY2	GO:0008152	GO:0016747	GO:0009055	GO:0005576	GO:0006952	GO:0005515
2.0_INSECT_GG3J73P03GGVAK	GO:0009055	GO:0051536	GO:0008152	GO:0016747	GO:0005515	GO:0004872	GO:0005488	GO:0007155	GO:0007160	GO:0007229	GO:0008305	GO:0005576	GO:0005525	GO:0005874	GO:0007017	GO:0016068
2.0_INSECT_GG3J73P03GGVH2	GO:0005525	GO:0005874	GO:0007017	GO:0005576	GO:0006952	GO:0005515
2.0_INSECT_GG3J73P03GGVW4	GO:0008152	GO:0016747	GO:0009055	GO:0005515
2.0_INSECT_GG3J73P03GGWGA	GO:0009055	GO:0051536	GO:0005576	GO:0005515
2.0_INSECT_GG3J73P03GGWKB	GO:0009055	GO:0004872	GO:0005488	GO:0007155	GO:0007160	GO:0007229	GO:0008305	GO:0005576	GO:0006952	GO:0005515	GO:0051536	GO:0008152	GO:0016747	GO:0005525	GO:0005874	GO:0007017
2.0_INSECT_GG3J73P03GGWMF	GO:0008152	GO:0016747	GO:0009055	GO:0005515	GO:0005576	GO:0005525	GO:0005874	GO:0007017	GO:0051536	GO:0004872	GO:0005488	GO:0007155	GO:0007160	GO:0007229	GO:0008305
2.0_INSECT_GG3J73P03GGWYF	GO:0009055	GO:0005576	GO:0005515	GO:0051536	GO:0005525	GO:0005874	GO:0007017
2.0_INSECT_GG3J73P03GGX14	GO:0004872	GO:0005488	GO:0007155	GO:0007160	GO:0007229	GO:0008305	GO:0005576	GO:0005515	GO:0008152	GO:0016747
2.0_INSECT_GG3J73P03GGX3H	GO:0009055	GO:0005576	GO:0005515	GO:0051536	GO:0008152	GO:0016747	GO:0005525	GO:0005874	GO:0007017	GO:0004872	GO:0005488	GO:0007155	GO:0007160	GO:0007229	GO:0008305	GO:0006952
2.0_INSECT_GG3J73P03GGXD4	GO:0009055	GO:0004872	GO:0005488	GO:0007155	GO:0007160	GO:0007229	GO:0008305	GO:0005576	GO:0006952	GO:0005515
2.0_INSECT_GG3J73P03GGXXP	GO:0005515	GO:0009055	GO:0005576	GO:0008152	GO:0016747	GO:0051536	GO:0005525	GO:0005874	GO:0007017
2.0_INSECT_GG3J73P03GGY6J	GO:0008152	GO:0016747	GO:0009055	GO:0005576	GO:0005515
2.0_INSECT_GG3J73P03GGZ55	GO:0009055	GO:0051536
2.0_INSECT_GG3J73P03GGZB3	GO:0009055	GO:0005576	GO:0006952	GO:0005515	GO:0008152	GO:0016747	GO:0051536	GO:0005525	GO:0005874	GO:0007017	GO:0004872	GO:0005488	GO:0007155	GO:0007160	GO:0007229	GO:0008305
2.0_INSECT_GG3J73P03GGZLB	GO:0005515	GO:0008152	GO:0016747	GO:0009055	GO:0051536	GO:0005576	GO:0006952	GO:0004872	GO:0005488	GO:0007155	GO:0007160	GO:0007229	GO:0008305
2.0_INSECT_GG3J73P03GGZM4	GO:0009055	GO:0005515	GO:0008152	GO:0016747	GO:0051536	GO:0005576	GO:0004872	GO:0005488	GO:0007155	GO:0007160	GO:0007229	GO:0008305	GO:0006952	GO:0005525	GO:0005874	GO:0007017
2.0_INSECT_GG3J73P03GGZTZ	GO:0005515	GO:0009055	GO:0005525	GO:0005874	GO:0007017	GO:0005576	GO:0008152	GO:0016747	GO:0051536	GO:0006952	GO:0004872	GO:0005488	GO:0007155	GO:0007160	GO:0007229	GO:0008305
2.0_INSECT_GG3J73P03GH0A1	GO:0009055	GO:0008152	GO:0016747	GO:0005576	GO:0005515	GO:0005525	GO:0005874	GO:0007017	GO:0004872	GO:0005488	GO:0007155	GO:0007160	GO:0007229	GO:0008305	GO:0051536
2.0_INSECT_GG3J73P03GH0FJ	GO:0009055	GO:0005576	GO:0005515	GO:0008152	GO:0016747	GO:0051536	GO:0005525	GO:0005874	GO:0007017	GO:0016068	GO:0006952	GO:0004872	GO:0005488	GO:0007155	GO:0007160	GO:0007229	GO:0008305
2.0_INSECT_GG3J73P03GH0ME	GO:0008152	GO:0016747	GO:0009055	GO:0016068	GO:0051536	GO:0005515	GO:0005576	GO:0004872	GO:0005488	GO:0007155	GO:0007160	GO:0007229	GO:0008305
2.0_INSECT_GG3J73P03GH14R	GO:0005576	GO:0009055	GO:0051536	GO:0005515	GO:0008152	GO:0016747	GO:0016068	GO:0006952	GO:0004872	GO:0005488	GO:0007155	GO:0007160	GO:0007229	GO:0008305	GO:0005525	GO:0005874	GO:0007017
2.0_INSECT_GG3J73P03GH16Z	GO:0001558	GO:0005520	GO:0005576	GO:0008152	GO:0016747	GO:0009055	GO:0051536	GO:0004872	GO:0005488	GO:0007155	GO:0007160	GO:0007229	GO:0008305	GO:0005515
2.0_INSECT_GG3J73P03GH1OW	GO:0009055	GO:0005515	GO:0051536	GO:0005576	GO:0006952	GO:0008152	GO:0016747	GO:0005525	GO:0005874	GO:0007017	GO:0004872	GO:0005488	GO:0007155	GO:0007160	GO:0007229	GO:0008305
2.0_INSECT_GG3J73P03GH1TL	GO:0009055	GO:0005525	GO:0005874	GO:0007017	GO:0005576	GO:0051536	GO:0005515	GO:0008152	GO:0016747	GO:0006952	GO:0009405
2.0_INSECT_GG3J73P03GH32B	GO:0009055	GO:0051536	GO:0004872	GO:0005488	GO:0007155	GO:0007160	GO:0007229	GO:0008305	GO:0005515	GO:0005576	GO:0009755	GO:0005525	GO:0005874	GO:0007017	GO:0006952	GO:0008152	GO:0016747	GO:0005199	GO:0009277
2.0_INSECT_GG3J73P03GH3HK	GO:0008152	GO:0016747	GO:0009055	GO:0005576	GO:0006952	GO:0005515	GO:0009405	GO:0005199	GO:0009277	GO:0005525	GO:0005874	GO:0007017	GO:0051536	GO:0004872	GO:0005488	GO:0007155	GO:0007160	GO:0007229	GO:0008305
2.0_INSECT_GG3J73P03GH3XG	GO:0005576	GO:0009055	GO:0051536
2.0_INSECT_GG3J73P03GH4A2	GO:0009055	GO:0005576	GO:0005515	GO:0008152	GO:0016747	GO:0004872	GO:0005488	GO:0007155	GO:0007160	GO:0007229	GO:0008305	GO:0006952	GO:0051536	GO:0005525	GO:0005874	GO:0007017
2.0_INSECT_GG3J73P03GH5AC	GO:0009055	GO:0005515	GO:0005576	GO:0008152	GO:0016747
2.0_INSECT_GG3J73P03GH5VK	GO:0005576	GO:0005515	GO:0009055	GO:0001558	GO:0005520	GO:0051536	GO:0005525	GO:0005874	GO:0007017	GO:0008152	GO:0016747
2.0_INSECT_GG3J73P03GH5VW	GO:0009055	GO:0051536	GO:0004872	GO:0005488	GO:0007155	GO:0007160	GO:0007229	GO:0008305	GO:0005515	GO:0008152	GO:0016747	GO:0005576	GO:0006952
2.0_INSECT_GG3J73P03GH5WQ	GO:0005576	GO:0009055	GO:0006952	GO:0005515	GO:0008152	GO:0016747	GO:0004872	GO:0005488	GO:0007155	GO:0007160	GO:0007229	GO:0008305	GO:0051536	GO:0005525	GO:0005874	GO:0007017
2.0_INSECT_GG3J73P03GH5YV	GO:0009055	GO:0016068	GO:0008152	GO:0016747	GO:0005576	GO:0005515	GO:0005525	GO:0005874	GO:0007017	GO:0051536	GO:0006952	GO:0004872	GO:0005488	GO:0007155	GO:0007160	GO:0007229	GO:0008305
2.0_INSECT_GG3J73P03GH6YN	GO:0009055	GO:0051536
2.0_INSECT_GG3J73P03GH7A7	GO:0004872	GO:0005488	GO:0007155	GO:0007160	GO:0007229	GO:0008305	GO:0005576	GO:0005515
2.0_INSECT_GG3J73P03GH7BS	GO:0009055	GO:0051536	GO:0005576	GO:0005515	GO:0008152	GO:0016747	GO:0016068	GO:0006952	GO:0005199	GO:0009277	GO:0004872	GO:0005488	GO:0007155	GO:0007160	GO:0007229	GO:0008305	GO:0005525	GO:0005874	GO:0007017
2.0_INSECT_GG3J73P03GH84A	GO:0009055	GO:0005576	GO:0008152	GO:0016747	GO:0005515	GO:0005525	GO:0005874	GO:0007017	GO:0051536	GO:0004872	GO:0005488	GO:0007155	GO:0007160	GO:0007229	GO:0008305
2.0_INSECT_GG3J73P03GH8C8	GO:0009055	GO:0005515	GO:0051536	GO:0005576	GO:0008152	GO:0016747	GO:0004872	GO:0005488	GO:0007155	GO:0007160	GO:0007229	GO:0008305	GO:0006952	GO:0009755
2.0_INSECT_GG3J73P03GH8FZ	GO:0005515
2.0_INSECT_GG3J73P03GH978	GO:0008152	GO:0016747	GO:0009055	GO:0005515	GO:0005576	GO:0006952	GO:0046872	GO:0005525	GO:0005874	GO:0007017	GO:0004872	GO:0005488	GO:0007155	GO:0007160	GO:0007229	GO:0008305
2.0_INSECT_GG3J73P03GH9ST	GO:0009055	GO:0005515	GO:0005525	GO:0005874	GO:0007017	GO:0005576	GO:0004872	GO:0005488	GO:0007155	GO:0007160	GO:0007229	GO:0008305	GO:0051536	GO:0016068	GO:0008152	GO:0016747	GO:0006952	GO:0009755
2.0_INSECT_GG3J73P03GHBAU	GO:0008152	GO:0016747	GO:0009055	GO:0005515	GO:0004872	GO:0005488	GO:0007155	GO:0007160	GO:0007229	GO:0008305	GO:0005576	GO:0051536	GO:0006952
2.0_INSECT_GG3J73P03GHBDP	GO:0009055	GO:0005576	GO:0005515	GO:0008152	GO:0016747	GO:0005199	GO:0009277	GO:0004872	GO:0005488	GO:0007155	GO:0007160	GO:0007229	GO:0008305	GO:0006952	GO:0051536
2.0_INSECT_GG3J73P03GHBEU	GO:0005525	GO:0005874	GO:0007017	GO:0005199	GO:0009277	GO:0005515	GO:0009055	GO:0008152	GO:0016747
2.0_INSECT_GG3J73P03GHBOH	GO:0008152	GO:0016747	GO:0009055	GO:0005525	GO:0005874	GO:0007017	GO:0005576	GO:0005515	GO:0051536	GO:0004872	GO:0005488	GO:0007155	GO:0007160	GO:0007229	GO:0008305
2.0_INSECT_GG3J73P03GHBYJ	GO:0005576	GO:0005515	GO:0009055	GO:0051536
2.0_INSECT_GG3J73P03GHBZT	GO:0009055	GO:0008152	GO:0016747	GO:0005525	GO:0005874	GO:0007017	GO:0005515	GO:0051536	GO:0004872	GO:0005488	GO:0007155	GO:0007160	GO:0007229	GO:0008305	GO:0005576
2.0_INSECT_GG3J73P03GHDB7	GO:0009055
2.0_INSECT_GG3J73P03GHDBW	GO:0009055	GO:0005515	GO:0008152	GO:0016747	GO:0004872	GO:0005488	GO:0007155	GO:0007160	GO:0007229	GO:0008305	GO:0005576	GO:0051536	GO:0005525	GO:0005874	GO:0007017
2.0_INSECT_GG3J73P03GHEBL	GO:0009055	GO:0051536	GO:0005515	GO:0005576	GO:0006952	GO:0005199	GO:0009277	GO:0004872	GO:0005488	GO:0007155	GO:0007160	GO:0007229	GO:0008305	GO:0008152	GO:0016747
2.0_INSECT_GG3J73P03GHEH9	GO:0009055	GO:0005576	GO:0005515	GO:0008152	GO:0016747	GO:0051536	GO:0006952	GO:0004872	GO:0005488	GO:0007155	GO:0007160	GO:0007229	GO:0008305
2.0_INSECT_GG3J73P03GHETH	GO:0008152	GO:0016747	GO:0005576	GO:0005515	GO:0009055	GO:0051536	GO:0005199	GO:0009277	GO:0004872	GO:0005488	GO:0007155	GO:0007160	GO:0007229	GO:0008305
2.0_INSECT_GG3J73P03GHFZT	GO:0009055	GO:0005576	GO:0006952	GO:0005515	GO:0005525	GO:0005874	GO:0007017	GO:0042309	GO:0050825	GO:0050826	GO:0008152	GO:0016747	GO:0004872	GO:0005488	GO:0007155	GO:0007160	GO:0007229	GO:0008305
2.0_INSECT_GG3J73P03GHGKQ	GO:0008152	GO:0016747	GO:0009055	GO:0051536	GO:0005525	GO:0005874	GO:0007017	GO:0005576	GO:0005515
2.0_INSECT_GG3J73P03GHGRL	GO:0009055	GO:0051536	GO:0005515	GO:0008152	GO:0016747
2.0_INSECT_GG3J73P03GHGS3	GO:0008152	GO:0016747	GO:0005576	GO:0009055	GO:0051536	GO:0005515	GO:0006952	GO:0004872	GO:0005488	GO:0007155	GO:0007160	GO:0007229	GO:0008305	GO:0005525	GO:0005874	GO:0007017	GO:0046872
2.0_INSECT_GG3J73P03GHGWY	GO:0008152	GO:0016747	GO:0009055
2.0_INSECT_GG3J73P03GHI22	GO:0009055	GO:0005576	GO:0006952	GO:0008152	GO:0016747
2.0_INSECT_GG3J73P03GHIJW	GO:0005525	GO:0005874	GO:0007017	GO:0016068	GO:0009055	GO:0005576	GO:0006952	GO:0005515	GO:0008152	GO:0016747	GO:0051536	GO:0004872	GO:0005488	GO:0007155	GO:0007160	GO:0007229	GO:0008305
2.0_INSECT_GG3J73P03GHIZO	GO:0005515	GO:0005576	GO:0006952	GO:0009055	GO:0051536	GO:0005525	GO:0005874	GO:0007017	GO:0008152	GO:0016747	GO:0004872	GO:0005488	GO:0007155	GO:0007160	GO:0007229	GO:0008305	GO:0009755
2.0_INSECT_GG3J73P03GHJAX	GO:0009055	GO:0051536	GO:0005576	GO:0005515	GO:0008152	GO:0016747	GO:0006952
2.0_INSECT_GG3J73P03GHJYE	GO:0005576	GO:0005515	GO:0008152	GO:0016747	GO:0009055
2.0_INSECT_GG3J73P03GHKHF	GO:0009055	GO:0051536	GO:0005576	GO:0006952	GO:0005515	GO:0008152	GO:0016747
2.0_INSECT_GG3J73P03GHKJ3	GO:0008152	GO:0016747	GO:0009055	GO:0005576	GO:0005515
2.0_INSECT_GG3J73P03GHL5W	GO:0009055	GO:0005576	GO:0006952	GO:0005515	GO:0051536	GO:0004872	GO:0005488	GO:0007155	GO:0007160	GO:0007229	GO:0008305	GO:0005525	GO:0005874	GO:0007017	GO:0008152	GO:0016747	GO:0046872	GO:0016068
2.0_INSECT_GG3J73P03GHLT6	GO:0005525	GO:0005874	GO:0007017	GO:0005515	GO:0008152	GO:0016747	GO:0009055	GO:0051536	GO:0005576	GO:0004872	GO:0005488	GO:0007155	GO:0007160	GO:0007229	GO:0008305	GO:0006952	GO:0016068
2.0_INSECT_GG3J73P03GHLV0	GO:0008152	GO:0016747	GO:0009055	GO:0005515	GO:0005525	GO:0005874	GO:0007017	GO:0005576	GO:0004872	GO:0005488	GO:0007155	GO:0007160	GO:0007229	GO:0008305	GO:0051536	GO:0006952
2.0_INSECT_GG3J73P03GHLY3	GO:0009055	GO:0005576	GO:0008152	GO:0016747
2.0_INSECT_GG3J73P03GHMPW	GO:0009055	GO:0004872	GO:0005488	GO:0007155	GO:0007160	GO:0007229	GO:0008305	GO:0005576	GO:0005515	GO:0008152	GO:0016747
2.0_INSECT_GG3J73P03GHN58	GO:0009055	GO:0008152	GO:0016747	GO:0005515	GO:0005576	GO:0051536	GO:0004872	GO:0005488	GO:0007155	GO:0007160	GO:0007229	GO:0008305	GO:0006952	GO:0005525	GO:0005874	GO:0007017
2.0_INSECT_GG3J73P03GHN6I	GO:0009055	GO:0005525	GO:0005874	GO:0007017	GO:0008152	GO:0016747	GO:0004872	GO:0005488	GO:0007155	GO:0007160	GO:0007229	GO:0008305	GO:0005576	GO:0005515	GO:0006952	GO:0051536
2.0_INSECT_GG3J73P03GHNIZ	GO:0009055	GO:0008152	GO:0016747	GO:0051536	GO:0005576	GO:0005515	GO:0009405	GO:0004872	GO:0005488	GO:0007155	GO:0007160	GO:0007229	GO:0008305	GO:0005525	GO:0005874	GO:0007017
2.0_INSECT_GG3J73P03GHOQG	GO:0009055	GO:0051536	GO:0008152	GO:0016747	GO:0005525	GO:0005874	GO:0007017	GO:0005515	GO:0001558	GO:0005520	GO:0005576	GO:0004872	GO:0005488	GO:0007155	GO:0007160	GO:0007229	GO:0008305	GO:0006952	GO:0005199	GO:0009277
2.0_INSECT_GG3J73P03GHOV2	GO:0009055	GO:0005576	GO:0005515	GO:0008152	GO:0016747	GO:0051536	GO:0006952	GO:0004872	GO:0005488	GO:0007155	GO:0007160	GO:0007229	GO:0008305
2.0_INSECT_GG3J73P03GHPFH	GO:0005576	GO:0006952	GO:0009055	GO:0051536	GO:0005515	GO:0008152	GO:0016747	GO:0005525	GO:0005874	GO:0007017	GO:0016068	GO:0004872	GO:0005488	GO:0007155	GO:0007160	GO:0007229	GO:0008305	GO:0005199	GO:0009277
2.0_INSECT_GG3J73P03GHQ5N	GO:0009055	GO:0051536	GO:0005576	GO:0006952	GO:0005525	GO:0005874	GO:0007017
2.0_INSECT_GG3J73P03GHQ5Z	GO:0009055	GO:0005576	GO:0005515	GO:0005525	GO:0005874	GO:0007017	GO:0008152	GO:0016747	GO:0051536	GO:0016068	GO:0004872	GO:0005488	GO:0007155	GO:0007160	GO:0007229	GO:0008305	GO:0006952
2.0_INSECT_GG3J73P03GHQ96	GO:0009055	GO:0005576	GO:0006952	GO:0005515	GO:0004872	GO:0005488	GO:0007155	GO:0007160	GO:0007229	GO:0008305	GO:0008152	GO:0016747	GO:0051536	GO:0009755	GO:0005199	GO:0009277
2.0_INSECT_GG3J73P03GHQKD	GO:0009055	GO:0005525	GO:0005874	GO:0007017	GO:0005576	GO:0005515
2.0_INSECT_GG3J73P03GHQYN	GO:0009055	GO:0005576	GO:0008152	GO:0016747	GO:0051536	GO:0005515	GO:0006952	GO:0009755	GO:0004872	GO:0005488	GO:0007155	GO:0007160	GO:0007229	GO:0008305	GO:0005525	GO:0005874	GO:0007017
2.0_INSECT_GG3J73P03GHRMM	GO:0005576	GO:0009055	GO:0051536	GO:0005515
2.0_INSECT_GG3J73P03GHSDA	GO:0009055	GO:0005576	GO:0008152	GO:0016747
2.0_INSECT_GG3J73P03GHT1G	GO:0009055	GO:0008152	GO:0016747	GO:0005515	GO:0005576	GO:0006952	GO:0051536	GO:0005525	GO:0005874	GO:0007017	GO:0004872	GO:0005488	GO:0007155	GO:0007160	GO:0007229	GO:0008305
2.0_INSECT_GG3J73P03GHT5C	GO:0008152	GO:0016747	GO:0009055	GO:0005515	GO:0005576	GO:0004872	GO:0005488	GO:0007155	GO:0007160	GO:0007229	GO:0008305	GO:0005525	GO:0005874	GO:0007017	GO:0051536	GO:0006952
2.0_INSECT_GG3J73P03GHTKA	GO:0009055	GO:0051536	GO:0005515	GO:0008152	GO:0016747	GO:0005576	GO:0006952	GO:0004872	GO:0005488	GO:0007155	GO:0007160	GO:0007229	GO:0008305	GO:0005199	GO:0009277	GO:0004222	GO:0008270	GO:0046872	GO:0005525	GO:0005874	GO:0007017
2.0_INSECT_GG3J73P03GHTPO	GO:0005576	GO:0009055	GO:0004872	GO:0005488	GO:0007155	GO:0007160	GO:0007229	GO:0008305	GO:0006952	GO:0005515	GO:0008152	GO:0016747	GO:0051536	GO:0005525	GO:0005874	GO:0007017
2.0_INSECT_GG3J73P03GHULC	GO:0009055
2.0_INSECT_GG3J73P03GHUQ0	GO:0005515	GO:0009055	GO:0005576	GO:0051536	GO:0004872	GO:0005488	GO:0007155	GO:0007160	GO:0007229	GO:0008305	GO:0008152	GO:0016747	GO:0009755	GO:0016068
2.0_INSECT_GG3J73P03GHUSM	GO:0005576	GO:0005515	GO:0009055	GO:0051536	GO:0008152	GO:0016747	GO:0005525	GO:0005874	GO:0007017	GO:0004872	GO:0005488	GO:0007155	GO:0007160	GO:0007229	GO:0008305
2.0_INSECT_GG3J73P03GHWWY	GO:0008152	GO:0016747	GO:0009055
2.0_INSECT_GG3J73P03GHZM4	GO:0009055
2.0_INSECT_GG3J73P03F00DL	GO:0009055	GO:0008152	GO:0016747	GO:0005525	GO:0005874	GO:0007017	GO:0051536	GO:0005576	GO:0005515	GO:0006952	GO:0004872	GO:0005488	GO:0007155	GO:0007160	GO:0007229	GO:0008305	GO:0046872
2.0_INSECT_GG3J73P03F011M	GO:0009055	GO:0005515	GO:0008152	GO:0016747	GO:0005576
2.0_INSECT_GG3J73P03F015N	GO:0009055
2.0_INSECT_GG3J73P03F01IG	GO:0009055	GO:0008152	GO:0016747
2.0_INSECT_GG3J73P03F01Z1	GO:0009055	GO:0008152	GO:0016747	GO:0005576	GO:0005515	GO:0051536	GO:0004872	GO:0005488	GO:0007155	GO:0007160	GO:0007229	GO:0008305	GO:0006952	GO:0005525	GO:0005874	GO:0007017	GO:0042309	GO:0050825	GO:0050826
2.0_INSECT_GG3J73P03F0240	GO:0009055	GO:0005515	GO:0008152	GO:0016747	GO:0005576	GO:0005525	GO:0005874	GO:0007017	GO:0004872	GO:0005488	GO:0007155	GO:0007160	GO:0007229	GO:0008305	GO:0051536	GO:0006952
2.0_INSECT_GG3J73P03F02WU	GO:0009055	GO:0005576	GO:0005515
2.0_INSECT_GG3J73P03F032V	GO:0008152	GO:0016747	GO:0009055	GO:0005515
2.0_INSECT_GG3J73P03F03NA	GO:0009055	GO:0005576	GO:0005515
2.0_INSECT_GG3J73P03F03UU	GO:0008152	GO:0016747	GO:0009055	GO:0051536	GO:0004872	GO:0005488	GO:0007155	GO:0007160	GO:0007229	GO:0008305	GO:0005576	GO:0006952	GO:0005515
2.0_INSECT_GG3J73P03F03ZO	GO:0009055	GO:0005525	GO:0005874	GO:0007017	GO:0005515
2.0_INSECT_GG3J73P03F042E	GO:0009055
2.0_INSECT_GG3J73P03F047C	GO:0009055	GO:0005576	GO:0005515	GO:0046872	GO:0008152	GO:0016747	GO:0004872	GO:0005488	GO:0007155	GO:0007160	GO:0007229	GO:0008305	GO:0051536	GO:0005525	GO:0005874	GO:0007017	GO:0005199	GO:0009277
2.0_INSECT_GG3J73P03F054N	GO:0009055	GO:0005576	GO:0006952	GO:0005515	GO:0008152	GO:0016747	GO:0051536	GO:0004872	GO:0005488	GO:0007155	GO:0007160	GO:0007229	GO:0008305	GO:0005525	GO:0005874	GO:0007017	GO:0016068	GO:0005199	GO:0009277
2.0_INSECT_GG3J73P03F057E	GO:0009055	GO:0008152	GO:0016747
2.0_INSECT_GG3J73P03F05NA	GO:0008152	GO:0016747	GO:0009055	GO:0016068	GO:0051536	GO:0004872	GO:0005488	GO:0007155	GO:0007160	GO:0007229	GO:0008305	GO:0005576	GO:0005515	GO:0005525	GO:0005874	GO:0007017	GO:0006952
2.0_INSECT_GG3J73P03F05ZU	GO:0008152	GO:0016747	GO:0009055	GO:0051536	GO:0005515	GO:0005199	GO:0009277	GO:0004872	GO:0005488	GO:0007155	GO:0007160	GO:0007229	GO:0008305	GO:0005576	GO:0006952
2.0_INSECT_GG3J73P03F06T0	GO:0009055	GO:0051536	GO:0005515	GO:0004872	GO:0005488	GO:0007155	GO:0007160	GO:0007229	GO:0008305	GO:0005576	GO:0008152	GO:0016747	GO:0005525	GO:0005874	GO:0007017	GO:0006952	GO:0005199	GO:0009277	GO:0016068	GO:0009755
2.0_INSECT_GG3J73P03F06UF	GO:0008152	GO:0016747	GO:0016068	GO:0009055	GO:0005515
2.0_INSECT_GG3J73P03F070S	GO:0009055	GO:0005576	GO:0008152	GO:0016747	GO:0005525	GO:0005874	GO:0007017	GO:0006952	GO:0005515	GO:0004872	GO:0005488	GO:0007155	GO:0007160	GO:0007229	GO:0008305	GO:0051536
2.0_INSECT_GG3J73P03F073B	GO:0008152	GO:0016747	GO:0005576	GO:0004872	GO:0005488	GO:0007155	GO:0007160	GO:0007229	GO:0008305	GO:0005515	GO:0009055	GO:0051536	GO:0005199	GO:0009277	GO:0006952
2.0_INSECT_GG3J73P03F07RW	GO:0008152	GO:0016747	GO:0005525	GO:0005874	GO:0007017	GO:0005576	GO:0009055	GO:0051536	GO:0005515	GO:0004872	GO:0005488	GO:0007155	GO:0007160	GO:0007229	GO:0008305	GO:0009755
2.0_INSECT_GG3J73P03F08HU	GO:0009055	GO:0051536	GO:0005515	GO:0005576	GO:0008152	GO:0016747	GO:0004872	GO:0005488	GO:0007155	GO:0007160	GO:0007229	GO:0008305	GO:0004252	GO:0006508	GO:0006952	GO:0009405	GO:0009755
2.0_INSECT_GG3J73P03F08ZW	GO:0008152	GO:0016747	GO:0005576	GO:0009055	GO:0005515	GO:0051536	GO:0004872	GO:0005488	GO:0007155	GO:0007160	GO:0007229	GO:0008305
2.0_INSECT_GG3J73P03F090K	GO:0008152	GO:0016747
2.0_INSECT_GG3J73P03F099S	GO:0005525	GO:0005874	GO:0007017	GO:0005576	GO:0009055	GO:0051536	GO:0006952	GO:0005515	GO:0016068	GO:0008152	GO:0016747	GO:0005199	GO:0009277	GO:0004872	GO:0005488	GO:0007155	GO:0007160	GO:0007229	GO:0008305
2.0_INSECT_GG3J73P03F09GI	GO:0009055	GO:0051536	GO:0005576	GO:0005515	GO:0008152	GO:0016747	GO:0006952
2.0_INSECT_GG3J73P03F0A1L	GO:0009055	GO:0005576	GO:0006952	GO:0005515	GO:0008152	GO:0016747
2.0_INSECT_GG3J73P03F0AXN	GO:0005515	GO:0009055
2.0_INSECT_GG3J73P03F0B97	GO:0008152	GO:0016747
2.0_INSECT_GG3J73P03F0CIV	GO:0008152	GO:0016747	GO:0009055	GO:0005525	GO:0005874	GO:0007017	GO:0016068	GO:0051536	GO:0005576	GO:0005515	GO:0004872	GO:0005488	GO:0007155	GO:0007160	GO:0007229	GO:0008305	GO:0006952
2.0_INSECT_GG3J73P03F0CJA	GO:0009055	GO:0005515	GO:0005576	GO:0008152	GO:0016747	GO:0005525	GO:0005874	GO:0007017	GO:0051536	GO:0006952	GO:0046872	GO:0016068	GO:0005199	GO:0009277	GO:0004872	GO:0005488	GO:0007155	GO:0007160	GO:0007229	GO:0008305
2.0_INSECT_GG3J73P03F0D2D	GO:0009055	GO:0005515	GO:0008152	GO:0016747	GO:0005576	GO:0051536	GO:0004872	GO:0005488	GO:0007155	GO:0007160	GO:0007229	GO:0008305	GO:0005525	GO:0005874	GO:0007017
2.0_INSECT_GG3J73P03F0D7F	GO:0008152	GO:0016747	GO:0005515	GO:0016068	GO:0009055	GO:0005576	GO:0006952	GO:0051536	GO:0004872	GO:0005488	GO:0007155	GO:0007160	GO:0007229	GO:0008305
2.0_INSECT_GG3J73P03F0DHI	GO:0005576	GO:0009055	GO:0051536	GO:0004872	GO:0005488	GO:0007155	GO:0007160	GO:0007229	GO:0008305	GO:0006952	GO:0005515
2.0_INSECT_GG3J73P03F0DP2	GO:0009055	GO:0005576	GO:0005515	GO:0051536	GO:0006952	GO:0008152	GO:0016747	GO:0004872	GO:0005488	GO:0007155	GO:0007160	GO:0007229	GO:0008305	GO:0005525	GO:0005874	GO:0007017
2.0_INSECT_GG3J73P03F0E9J	GO:0009055	GO:0005515	GO:0008152	GO:0016747	GO:0005576	GO:0051536	GO:0006952
2.0_INSECT_GG3J73P03F0EC3	GO:0009055	GO:0005576	GO:0008152	GO:0016747	GO:0005515	GO:0016068	GO:0051536
2.0_INSECT_GG3J73P03F0ECG	GO:0009055	GO:0005576	GO:0005515
2.0_INSECT_GG3J73P03F0EWV	GO:0005576	GO:0005515	GO:0016068	GO:0009055	GO:0051536	GO:0008152	GO:0016747	GO:0004872	GO:0005488	GO:0007155	GO:0007160	GO:0007229	GO:0008305	GO:0006952	GO:0046872	GO:0005199	GO:0009277	GO:0005525	GO:0005874	GO:0007017
2.0_INSECT_GG3J73P03F0EYL	GO:0009055	GO:0005515
2.0_INSECT_GG3J73P03F0FFP	GO:0005525	GO:0005874	GO:0007017	GO:0009055	GO:0008152	GO:0016747	GO:0005515	GO:0051536	GO:0005576	GO:0004872	GO:0005488	GO:0007155	GO:0007160	GO:0007229	GO:0008305
2.0_INSECT_GG3J73P03F0FQ9	GO:0009055	GO:0051536	GO:0005515	GO:0005576	GO:0008152	GO:0016747	GO:0004872	GO:0005488	GO:0007155	GO:0007160	GO:0007229	GO:0008305	GO:0006952
2.0_INSECT_GG3J73P03F0GD4	GO:0009055	GO:0005515	GO:0005576
2.0_INSECT_GG3J73P03F0GGW	GO:0009055	GO:0051536	GO:0005515	GO:0008152	GO:0016747
2.0_INSECT_GG3J73P03F0GTU	GO:0008152	GO:0016747	GO:0005515	GO:0009055	GO:0005576	GO:0006952	GO:0009405	GO:0009755	GO:0051536	GO:0016068	GO:0005525	GO:0005874	GO:0007017	GO:0004872	GO:0005488	GO:0007155	GO:0007160	GO:0007229	GO:0008305
2.0_INSECT_GG3J73P03F0GVL	GO:0001558	GO:0005520	GO:0005576	GO:0009055	GO:0051536	GO:0004872	GO:0005488	GO:0007155	GO:0007160	GO:0007229	GO:0008305	GO:0005515	GO:0005525	GO:0005874	GO:0007017	GO:0006952	GO:0008152	GO:0016747	GO:0046872
2.0_INSECT_GG3J73P03F0GWL	GO:0008152	GO:0016747	GO:0009055
2.0_INSECT_GG3J73P03F0GZB	GO:0009055	GO:0051536	GO:0004872	GO:0005488	GO:0007155	GO:0007160	GO:0007229	GO:0008305	GO:0005515	GO:0008152	GO:0016747	GO:0005576	GO:0006952	GO:0005525	GO:0005874	GO:0007017	GO:0046872
2.0_INSECT_GG3J73P03F0H1Q	GO:0009055	GO:0004872	GO:0005488	GO:0007155	GO:0007160	GO:0007229	GO:0008305	GO:0008152	GO:0016747	GO:0005515	GO:0051536	GO:0005576	GO:0009405	GO:0005525	GO:0005874	GO:0007017	GO:0006952	GO:0046872	GO:0016068
2.0_INSECT_GG3J73P03F0HUY	GO:0009055
2.0_INSECT_GG3J73P03F0IP4	GO:0008152	GO:0016747	GO:0009055	GO:0005525	GO:0005874	GO:0007017	GO:0005515	GO:0004872	GO:0005488	GO:0007155	GO:0007160	GO:0007229	GO:0008305	GO:0005576	GO:0051536	GO:0006952
2.0_INSECT_GG3J73P03F0J52	GO:0008152	GO:0016747	GO:0009055	GO:0005576	GO:0051536	GO:0006952	GO:0005515	GO:0004872	GO:0005488	GO:0007155	GO:0007160	GO:0007229	GO:0008305	GO:0009755	GO:0005525	GO:0005874	GO:0007017
2.0_INSECT_GG3J73P03F0J7X	GO:0009055	GO:0005515	GO:0008152	GO:0016747	GO:0005576	GO:0051536	GO:0006952	GO:0009755	GO:0004872	GO:0005488	GO:0007155	GO:0007160	GO:0007229	GO:0008305
2.0_INSECT_GG3J73P03F0JUG	GO:0005515	GO:0008152	GO:0016747	GO:0009055	GO:0005525	GO:0005874	GO:0007017	GO:0051536	GO:0005576	GO:0006952	GO:0004872	GO:0005488	GO:0007155	GO:0007160	GO:0007229	GO:0008305
2.0_INSECT_GG3J73P03F0JWE	GO:0005576	GO:0005515	GO:0008152	GO:0016747	GO:0009055
2.0_INSECT_GG3J73P03F0JXI	GO:0009055	GO:0008152	GO:0016747	GO:0005515	GO:0004872	GO:0005488	GO:0007155	GO:0007160	GO:0007229	GO:0008305	GO:0005576	GO:0006952	GO:0009405	GO:0009755	GO:0051536
2.0_INSECT_GG3J73P03F0JYN	GO:0009055	GO:0051536	GO:0005515
2.0_INSECT_GG3J73P03F0K48	GO:0009055
2.0_INSECT_GG3J73P03F0KKY	GO:0009055	GO:0004872	GO:0005488	GO:0007155	GO:0007160	GO:0007229	GO:0008305	GO:0005515	GO:0008152	GO:0016747	GO:0005525	GO:0005874	GO:0007017	GO:0005576	GO:0016068	GO:0051536	GO:0006952
2.0_INSECT_GG3J73P03F0KLC	GO:0009055	GO:0005515	GO:0008152	GO:0016747	GO:0005576	GO:0006952	GO:0051536	GO:0005525	GO:0005874	GO:0007017
2.0_INSECT_GG3J73P03F0LTI	GO:0009055	GO:0051536	GO:0005576	GO:0006952	GO:0005515	GO:0008152	GO:0016747	GO:0004872	GO:0005488	GO:0007155	GO:0007160	GO:0007229	GO:0008305	GO:0005525	GO:0005874	GO:0007017
2.0_INSECT_GG3J73P03F0LZP	GO:0009055	GO:0004872	GO:0005488	GO:0007155	GO:0007160	GO:0007229	GO:0008305	GO:0005576	GO:0006952	GO:0005515	GO:0008152	GO:0016747	GO:0051536	GO:0042309	GO:0050825	GO:0050826	GO:0005525	GO:0005874	GO:0007017	GO:0016068
2.0_INSECT_GG3J73P03F0M3C	GO:0005576	GO:0008152	GO:0016747	GO:0009055	GO:0005199	GO:0009277	GO:0004872	GO:0005488	GO:0007155	GO:0007160	GO:0007229	GO:0008305	GO:0006952	GO:0005515	GO:0051536	GO:0046872	GO:0005525	GO:0005874	GO:0007017
2.0_INSECT_GG3J73P03F0M3Y	GO:0005515	GO:0009055
2.0_INSECT_GG3J73P03F0MBI	GO:0009055	GO:0051536	GO:0005576
2.0_INSECT_GG3J73P03F0MLK	GO:0005576	GO:0005515	GO:0009055	GO:0005525	GO:0005874	GO:0007017	GO:0008152	GO:0016747	GO:0004872	GO:0005488	GO:0007155	GO:0007160	GO:0007229	GO:0008305	GO:0051536
2.0_INSECT_GG3J73P03F0MLV	GO:0009055	GO:0008152	GO:0016747	GO:0051536	GO:0005515	GO:0005576	GO:0016068	GO:0004872	GO:0005488	GO:0007155	GO:0007160	GO:0007229	GO:0008305
2.0_INSECT_GG3J73P03F0MQ4	GO:0009055	GO:0051536	GO:0005515	GO:0046872	GO:0008152	GO:0016747	GO:0005525	GO:0005874	GO:0007017	GO:0004872	GO:0005488	GO:0007155	GO:0007160	GO:0007229	GO:0008305	GO:0005199	GO:0009277	GO:0005576	GO:0006952
2.0_INSECT_GG3J73P03F0NQZ	GO:0009055
2.0_INSECT_GG3J73P03F0NWZ	GO:0008152	GO:0016747	GO:0005515	GO:0009055	GO:0005525	GO:0005874	GO:0007017	GO:0005576	GO:0051536	GO:0004872	GO:0005488	GO:0007155	GO:0007160	GO:0007229	GO:0008305	GO:0016068	GO:0006952
2.0_INSECT_GG3J73P03F0OGF	GO:0005576	GO:0008152	GO:0016747	GO:0009055	GO:0005515	GO:0005525	GO:0005874	GO:0007017	GO:0051536	GO:0006952
2.0_INSECT_GG3J73P03F0OZC	GO:0009055	GO:0051536	GO:0004872	GO:0005488	GO:0007155	GO:0007160	GO:0007229	GO:0008305	GO:0005576
2.0_INSECT_GG3J73P03F0P7H	GO:0008152	GO:0016747	GO:0005525	GO:0005874	GO:0007017
2.0_INSECT_GG3J73P03F0P97	GO:0004872	GO:0005488	GO:0007155	GO:0007160	GO:0007229	GO:0008305
2.0_INSECT_GG3J73P03F0PPO	GO:0005515	GO:0008152	GO:0016747	GO:0009055	GO:0005576	GO:0004872	GO:0005488	GO:0007155	GO:0007160	GO:0007229	GO:0008305	GO:0051536	GO:0006952	GO:0009755	GO:0005525	GO:0005874	GO:0007017
2.0_INSECT_GG3J73P03F0PRM	GO:0009055	GO:0005515	GO:0046872	GO:0008152	GO:0016747	GO:0051536	GO:0004872	GO:0005488	GO:0007155	GO:0007160	GO:0007229	GO:0008305	GO:0005576	GO:0006952	GO:0042309	GO:0050825	GO:0050826	GO:0003676	GO:0008270
2.0_INSECT_GG3J73P03F0Q36	GO:0009055	GO:0008152	GO:0016747	GO:0005576	GO:0005515	GO:0005525	GO:0005874	GO:0007017	GO:0051536	GO:0004872	GO:0005488	GO:0007155	GO:0007160	GO:0007229	GO:0008305	GO:0046872	GO:0006952	GO:0016068
2.0_INSECT_GG3J73P03F0QO4	GO:0008152	GO:0016747	GO:0009055
2.0_INSECT_GG3J73P03F0QSK	GO:0008152	GO:0016747	GO:0005515
2.0_INSECT_GG3J73P03F0RCV	GO:0009055	GO:0008152	GO:0016747	GO:0005525	GO:0005874	GO:0007017	GO:0004872	GO:0005488	GO:0007155	GO:0007160	GO:0007229	GO:0008305	GO:0005576	GO:0005515	GO:0046872	GO:0006952	GO:0005199	GO:0009277	GO:0016068	GO:0051536
2.0_INSECT_GG3J73P03F0S0Y	GO:0009055	GO:0008152	GO:0016747	GO:0005576	GO:0005515	GO:0051536	GO:0004872	GO:0005488	GO:0007155	GO:0007160	GO:0007229	GO:0008305	GO:0009755
2.0_INSECT_GG3J73P03F0S2X	GO:0009055	GO:0005576	GO:0005515	GO:0008152	GO:0016747	GO:0004872	GO:0005488	GO:0007155	GO:0007160	GO:0007229	GO:0008305	GO:0051536	GO:0001558	GO:0005520	GO:0006952	GO:0005525	GO:0005874	GO:0007017	GO:0016068
2.0_INSECT_GG3J73P03F0SBB	GO:0009055	GO:0005515	GO:0005576	GO:0051536	GO:0004872	GO:0005488	GO:0007155	GO:0007160	GO:0007229	GO:0008305	GO:0008152	GO:0016747
2.0_INSECT_GG3J73P03F0ST2	GO:0008152	GO:0016747	GO:0005576	GO:0005515	GO:0009055	GO:0051536
2.0_INSECT_GG3J73P03F0SWL	GO:0005525	GO:0005874	GO:0007017	GO:0009055	GO:0005515	GO:0005576
2.0_INSECT_GG3J73P03F0SZP	GO:0005576	GO:0009055	GO:0005515	GO:0008152	GO:0016747	GO:0051536
2.0_INSECT_GG3J73P03F0TBY	GO:0009055	GO:0005515	GO:0005576	GO:0005525	GO:0005874	GO:0007017	GO:0008152	GO:0016747	GO:0051536	GO:0016068	GO:0004872	GO:0005488	GO:0007155	GO:0007160	GO:0007229	GO:0008305	GO:0006952	GO:0005199	GO:0009277
2.0_INSECT_GG3J73P03F0TE3	GO:0009055	GO:0008152	GO:0016747	GO:0005576
2.0_INSECT_GG3J73P03F0TNT	GO:0009055	GO:0008152	GO:0016747	GO:0005576	GO:0005515
2.0_INSECT_GG3J73P03F0TS0	GO:0008152	GO:0016747	GO:0009055	GO:0005515	GO:0004872	GO:0005488	GO:0007155	GO:0007160	GO:0007229	GO:0008305	GO:0005576	GO:0006952	GO:0051536
2.0_INSECT_GG3J73P03F0TY7	GO:0008152	GO:0016747	GO:0009055	GO:0051536	GO:0005515	GO:0005525	GO:0005874	GO:0007017	GO:0005576	GO:0009755	GO:0046872	GO:0004872	GO:0005488	GO:0007155	GO:0007160	GO:0007229	GO:0008305	GO:0006952
2.0_INSECT_GG3J73P03F0TYH	GO:0009055	GO:0005576	GO:0008152	GO:0016747	GO:0051536	GO:0005515	GO:0004872	GO:0005488	GO:0007155	GO:0007160	GO:0007229	GO:0008305	GO:0006952	GO:0005525	GO:0005874	GO:0007017
2.0_INSECT_GG3J73P03F0U7U	GO:0009055	GO:0005515	GO:0005576
2.0_INSECT_GG3J73P03F0UBL	GO:0009055	GO:0005576	GO:0005515	GO:0051536	GO:0006952	GO:0008152	GO:0016747	GO:0046872	GO:0004872	GO:0005488	GO:0007155	GO:0007160	GO:0007229	GO:0008305
2.0_INSECT_GG3J73P03F0UIH	GO:0009055	GO:0005576	GO:0005515	GO:0008152	GO:0016747	GO:0051536	GO:0004872	GO:0005488	GO:0007155	GO:0007160	GO:0007229	GO:0008305	GO:0006952	GO:0005525	GO:0005874	GO:0007017	GO:0016068
2.0_INSECT_GG3J73P03F0ULG	GO:0008152	GO:0016747	GO:0009055	GO:0051536	GO:0005576	GO:0006952	GO:0005515	GO:0004872	GO:0005488	GO:0007155	GO:0007160	GO:0007229	GO:0008305
2.0_INSECT_GG3J73P03F0WES	GO:0008152	GO:0016747	GO:0009055	GO:0005576	GO:0005515	GO:0051536	GO:0006952	GO:0005525	GO:0005874	GO:0007017
2.0_INSECT_GG3J73P03F0WPA	GO:0009055	GO:0005576	GO:0008152	GO:0016747	GO:0051536	GO:0005515	GO:0004872	GO:0005488	GO:0007155	GO:0007160	GO:0007229	GO:0008305	GO:0006952
2.0_INSECT_GG3J73P03F0XG2	GO:0005576	GO:0005515	GO:0009055	GO:0051536	GO:0004872	GO:0005488	GO:0007155	GO:0007160	GO:0007229	GO:0008305	GO:0008152	GO:0016747	GO:0005525	GO:0005874	GO:0007017	GO:0006952	GO:0005199	GO:0009277	GO:0016068
2.0_INSECT_GG3J73P03F0Y0C	GO:0009055	GO:0051536	GO:0005576	GO:0005515	GO:0046872
2.0_INSECT_GG3J73P03F0Y30	GO:0009055	GO:0005525	GO:0005874	GO:0007017
2.0_INSECT_GG3J73P03F0YJ3	GO:0009055	GO:0051536	GO:0005515
2.0_INSECT_GG3J73P03F0ZIO	GO:0009055	GO:0051536	GO:0005576	GO:0006952	GO:0005515
2.0_INSECT_GG3J73P03F104N	GO:0008152	GO:0016747	GO:0009055	GO:0005525	GO:0005874	GO:0007017
2.0_INSECT_GG3J73P03F108D	GO:0009055	GO:0051536	GO:0004872	GO:0005488	GO:0007155	GO:0007160	GO:0007229	GO:0008305	GO:0005515
2.0_INSECT_GG3J73P03F10IS	GO:0008152	GO:0016747	GO:0009055
2.0_INSECT_GG3J73P03F1105	GO:0004872	GO:0005488	GO:0007155	GO:0007160	GO:0007229	GO:0008305	GO:0005576	GO:0006952	GO:0005515	GO:0008152	GO:0016747	GO:0009055	GO:0051536
2.0_INSECT_GG3J73P03F11QX	GO:0009055	GO:0051536	GO:0004872	GO:0005488	GO:0007155	GO:0007160	GO:0007229	GO:0008305	GO:0005515	GO:0005576	GO:0006952	GO:0005525	GO:0005874	GO:0007017	GO:0008152	GO:0016747
2.0_INSECT_GG3J73P03F12J5	GO:0009055	GO:0005515	GO:0016068	GO:0008152	GO:0016747	GO:0051536	GO:0005576	GO:0004872	GO:0005488	GO:0007155	GO:0007160	GO:0007229	GO:0008305	GO:0006952	GO:0004252	GO:0006508
2.0_INSECT_GG3J73P03F12M9	GO:0005515
2.0_INSECT_GG3J73P03F135W	GO:0016068
2.0_INSECT_GG3J73P03F142H	GO:0009055	GO:0005515	GO:0005576	GO:0051536	GO:0008152	GO:0016747	GO:0004872	GO:0005488	GO:0007155	GO:0007160	GO:0007229	GO:0008305	GO:0006952	GO:0005525	GO:0005874	GO:0007017	GO:0046872
2.0_INSECT_GG3J73P03F145J	GO:0009055	GO:0005515
2.0_INSECT_GG3J73P03F146F	GO:0008152	GO:0016747	GO:0009055	GO:0005576	GO:0005515	GO:0006952	GO:0004872	GO:0005488	GO:0007155	GO:0007160	GO:0007229	GO:0008305	GO:0051536	GO:0005525	GO:0005874	GO:0007017
2.0_INSECT_GG3J73P03F14KW	GO:0005525	GO:0005874	GO:0007017
2.0_INSECT_GG3J73P03F14SM	GO:0009055	GO:0005525	GO:0005874	GO:0007017	GO:0005576	GO:0005515	GO:0051536	GO:0004872	GO:0005488	GO:0007155	GO:0007160	GO:0007229	GO:0008305	GO:0006952	GO:0042309	GO:0050825	GO:0050826	GO:0008152	GO:0016747
2.0_INSECT_GG3J73P03F14TC	GO:0009055	GO:0005515	GO:0051536	GO:0004872	GO:0005488	GO:0007155	GO:0007160	GO:0007229	GO:0008305	GO:0005576	GO:0008152	GO:0016747	GO:0006952	GO:0005199	GO:0009277	GO:0005525	GO:0005874	GO:0007017
2.0_INSECT_GG3J73P03F14TK	GO:0008152	GO:0016747	GO:0009055	GO:0004872	GO:0005488	GO:0007155	GO:0007160	GO:0007229	GO:0008305	GO:0005515	GO:0051536	GO:0005576	GO:0005525	GO:0005874	GO:0007017	GO:0006952
2.0_INSECT_GG3J73P03F156M	GO:0009055	GO:0008152	GO:0016747
2.0_INSECT_GG3J73P03F15BP	GO:0005515	GO:0009055	GO:0051536	GO:0008152	GO:0016747	GO:0005576	GO:0006952	GO:0004872	GO:0005488	GO:0007155	GO:0007160	GO:0007229	GO:0008305
2.0_INSECT_GG3J73P03F15E9	GO:0009055	GO:0005515	GO:0051536	GO:0005576	GO:0006952	GO:0008152	GO:0016747	GO:0046872	GO:0005525	GO:0005874	GO:0007017	GO:0004872	GO:0005488	GO:0007155	GO:0007160	GO:0007229	GO:0008305
2.0_INSECT_GG3J73P03F15G3	GO:0005576	GO:0005515	GO:0004872	GO:0005488	GO:0007155	GO:0007160	GO:0007229	GO:0008305
2.0_INSECT_GG3J73P03F15J6	GO:0009055	GO:0005515	GO:0008152	GO:0016747	GO:0005576	GO:0051536	GO:0004872	GO:0005488	GO:0007155	GO:0007160	GO:0007229	GO:0008305	GO:0016068	GO:0005525	GO:0005874	GO:0007017	GO:0006952
2.0_INSECT_GG3J73P03F15LU	GO:0005576	GO:0009055	GO:0008152	GO:0016747	GO:0005515	GO:0005525	GO:0005874	GO:0007017	GO:0006952	GO:0004872	GO:0005488	GO:0007155	GO:0007160	GO:0007229	GO:0008305	GO:0051536
2.0_INSECT_GG3J73P03F15UW	GO:0009055
2.0_INSECT_GG3J73P03F15YE	GO:0009055	GO:0005515	GO:0005576	GO:0008152	GO:0016747	GO:0005199	GO:0009277	GO:0003735	GO:0005622	GO:0005840	GO:0006412	GO:0051536
2.0_INSECT_GG3J73P03F169F	GO:0009055
2.0_INSECT_GG3J73P03F16O3	GO:0009055	GO:0005576	GO:0006952	GO:0005515	GO:0004872	GO:0005488	GO:0007155	GO:0007160	GO:0007229	GO:0008305	GO:0008152	GO:0016747	GO:0051536	GO:0005525	GO:0005874	GO:0007017	GO:0009755
2.0_INSECT_GG3J73P03F16S3	GO:0009055	GO:0004872	GO:0005488	GO:0007155	GO:0007160	GO:0007229	GO:0008305	GO:0008152	GO:0016747	GO:0051536	GO:0005515	GO:0005576	GO:0006952	GO:0005525	GO:0005874	GO:0007017
2.0_INSECT_GG3J73P03F17I3	GO:0009055	GO:0051536	GO:0005576	GO:0005515	GO:0008152	GO:0016747	GO:0004872	GO:0005488	GO:0007155	GO:0007160	GO:0007229	GO:0008305	GO:0006952	GO:0005199	GO:0009277	GO:0004222	GO:0008270	GO:0046872	GO:0005525	GO:0005874	GO:0007017	GO:0016068
2.0_INSECT_GG3J73P03F17RT	GO:0005576	GO:0005515	GO:0009055	GO:0051536	GO:0008152	GO:0016747	GO:0004872	GO:0005488	GO:0007155	GO:0007160	GO:0007229	GO:0008305
2.0_INSECT_GG3J73P03F18A6	GO:0008152	GO:0016747	GO:0005525	GO:0005874	GO:0007017	GO:0004872	GO:0005488	GO:0007155	GO:0007160	GO:0007229	GO:0008305	GO:0005515	GO:0009055	GO:0051536	GO:0005576	GO:0006952
2.0_INSECT_GG3J73P03F18FO	GO:0008152	GO:0016747
2.0_INSECT_GG3J73P03F18M7	GO:0009055	GO:0005515
2.0_INSECT_GG3J73P03F18W2	GO:0008152	GO:0016747	GO:0009055	GO:0051536	GO:0005515	GO:0005576	GO:0006952	GO:0004872	GO:0005488	GO:0007155	GO:0007160	GO:0007229	GO:0008305	GO:0005525	GO:0005874	GO:0007017
2.0_INSECT_GG3J73P03F192X	GO:0009055	GO:0008152	GO:0016747	GO:0005576	GO:0005515	GO:0005525	GO:0005874	GO:0007017	GO:0006952	GO:0051536
2.0_INSECT_GG3J73P03F19N6	GO:0009055	GO:0051536	GO:0004872	GO:0005488	GO:0007155	GO:0007160	GO:0007229	GO:0008305	GO:0005576	GO:0006952	GO:0005515	GO:0009755
2.0_INSECT_GG3J73P03F1A5A	GO:0009055	GO:0051536	GO:0004872	GO:0005488	GO:0007155	GO:0007160	GO:0007229	GO:0008305	GO:0005515	GO:0005576	GO:0006952	GO:0009755	GO:0008152	GO:0016747	GO:0005199	GO:0009277	GO:0016068	GO:0005525	GO:0005874	GO:0007017
2.0_INSECT_GG3J73P03F1A5I	GO:0009055	GO:0005515	GO:0008152	GO:0016747	GO:0005576	GO:0051536	GO:0005525	GO:0005874	GO:0007017
2.0_INSECT_GG3J73P03F1BDH	GO:0008152	GO:0016747	GO:0009055	GO:0005515	GO:0005576	GO:0004872	GO:0005488	GO:0007155	GO:0007160	GO:0007229	GO:0008305	GO:0051536	GO:0006952
2.0_INSECT_GG3J73P03F1C90	GO:0008152	GO:0016747	GO:0009055	GO:0005515	GO:0005576	GO:0006952	GO:0051536	GO:0004872	GO:0005488	GO:0007155	GO:0007160	GO:0007229	GO:0008305	GO:0005199	GO:0009277	GO:0005525	GO:0005874	GO:0007017
2.0_INSECT_GG3J73P03F1CJZ	GO:0008152	GO:0016747	GO:0005515
2.0_INSECT_GG3J73P03F1CQV	GO:0009055	GO:0051536	GO:0004872	GO:0005488	GO:0007155	GO:0007160	GO:0007229	GO:0008305	GO:0005576	GO:0006952	GO:0005515	GO:0009755
2.0_INSECT_GG3J73P03F1D4T	GO:0005515	GO:0009055	GO:0051536	GO:0005576	GO:0008152	GO:0016747	GO:0004872	GO:0005488	GO:0007155	GO:0007160	GO:0007229	GO:0008305	GO:0006952	GO:0005525	GO:0005874	GO:0007017	GO:0046872
2.0_INSECT_GG3J73P03F1DFC	GO:0008152	GO:0016747	GO:0009055	GO:0051536	GO:0005515	GO:0005576	GO:0006952	GO:0004872	GO:0005488	GO:0007155	GO:0007160	GO:0007229	GO:0008305
2.0_INSECT_GG3J73P03F1EN4	GO:0009055	GO:0005576	GO:0005515	GO:0008152	GO:0016747	GO:0051536
2.0_INSECT_GG3J73P03F1EW9	GO:0008152	GO:0016747	GO:0009055	GO:0005576	GO:0005515	GO:0006952
2.0_INSECT_GG3J73P03F1FKY	GO:0008152	GO:0016747	GO:0009055	GO:0005576	GO:0005515	GO:0051536	GO:0004872	GO:0005488	GO:0007155	GO:0007160	GO:0007229	GO:0008305	GO:0005525	GO:0005874	GO:0007017	GO:0005199	GO:0009277	GO:0006952
2.0_INSECT_GG3J73P03F1FZ6	GO:0009055	GO:0051536	GO:0005515	GO:0005525	GO:0005874	GO:0007017	GO:0004872	GO:0005488	GO:0007155	GO:0007160	GO:0007229	GO:0008305	GO:0005576	GO:0008152	GO:0016747	GO:0006952	GO:0016068
2.0_INSECT_GG3J73P03F1HBD	GO:0009055	GO:0051536	GO:0004872	GO:0005488	GO:0007155	GO:0007160	GO:0007229	GO:0008305	GO:0005576	GO:0005515
2.0_INSECT_GG3J73P03F1HGQ	GO:0005515	GO:0009055
2.0_INSECT_GG3J73P03F1I16	GO:0009055	GO:0008152	GO:0016747	GO:0005576	GO:0005515	GO:0006952	GO:0051536	GO:0005525	GO:0005874	GO:0007017	GO:0005199	GO:0009277	GO:0004872	GO:0005488	GO:0007155	GO:0007160	GO:0007229	GO:0008305
2.0_INSECT_GG3J73P03F1I1Z	GO:0009055	GO:0005515	GO:0008152	GO:0016747	GO:0005525	GO:0005874	GO:0007017	GO:0005576	GO:0051536	GO:0004872	GO:0005488	GO:0007155	GO:0007160	GO:0007229	GO:0008305	GO:0046872
2.0_INSECT_GG3J73P03F1I8K	GO:0009055	GO:0004872	GO:0005488	GO:0007155	GO:0007160	GO:0007229	GO:0008305	GO:0005576	GO:0005515	GO:0006952	GO:0051536	GO:0009755	GO:0008152	GO:0016747
2.0_INSECT_GG3J73P03F1J25	GO:0008152	GO:0016747	GO:0009055	GO:0005515	GO:0051536	GO:0004872	GO:0005488	GO:0007155	GO:0007160	GO:0007229	GO:0008305	GO:0005576	GO:0006952	GO:0046872	GO:0001558	GO:0005520
2.0_INSECT_GG3J73P03F1JYA	GO:0009055	GO:0051536	GO:0005576	GO:0006952	GO:0005515	GO:0009755	GO:0008152	GO:0016747	GO:0004872	GO:0005488	GO:0007155	GO:0007160	GO:0007229	GO:0008305
2.0_INSECT_GG3J73P03F1KIO	GO:0009055
2.0_INSECT_GG3J73P03F1L2Q	GO:0009055	GO:0005515	GO:0008152	GO:0016747	GO:0051536	GO:0004872	GO:0005488	GO:0007155	GO:0007160	GO:0007229	GO:0008305	GO:0005576	GO:0005525	GO:0005874	GO:0007017	GO:0006952
2.0_INSECT_GG3J73P03F1L4Y	GO:0005515	GO:0009055	GO:0005576	GO:0051536	GO:0008152	GO:0016747	GO:0004872	GO:0005488	GO:0007155	GO:0007160	GO:0007229	GO:0008305	GO:0006952
2.0_INSECT_GG3J73P03F1LL3	GO:0005576	GO:0005515	GO:0009055	GO:0008152	GO:0016747	GO:0051536	GO:0005525	GO:0005874	GO:0007017	GO:0016068	GO:0004872	GO:0005488	GO:0007155	GO:0007160	GO:0007229	GO:0008305
2.0_INSECT_GG3J73P03F1LZ2	GO:0009055	GO:0005515	GO:0008152	GO:0016747	GO:0005576	GO:0006952	GO:0016068	GO:0004872	GO:0005488	GO:0007155	GO:0007160	GO:0007229	GO:0008305	GO:0051536	GO:0005525	GO:0005874	GO:0007017
2.0_INSECT_GG3J73P03F1MHA	GO:0009055	GO:0005576
2.0_INSECT_GG3J73P03F1OFB	GO:0008152	GO:0016747	GO:0009055	GO:0005515	GO:0051536	GO:0005576
2.0_INSECT_GG3J73P03F1OMD	GO:0009055
2.0_INSECT_GG3J73P03F1OW9	GO:0009055	GO:0005576	GO:0051536	GO:0005515	GO:0008152	GO:0016747	GO:0006952	GO:0046872	GO:0005525	GO:0005874	GO:0007017
2.0_INSECT_GG3J73P03F1OWY	GO:0004872	GO:0005488	GO:0007155	GO:0007160	GO:0007229	GO:0008305	GO:0005576	GO:0005515
2.0_INSECT_GG3J73P03F1P80	GO:0016068	GO:0008152	GO:0016747	GO:0005576	GO:0009055	GO:0051536	GO:0005515	GO:0006952	GO:0004872	GO:0005488	GO:0007155	GO:0007160	GO:0007229	GO:0008305	GO:0005525	GO:0005874	GO:0007017
2.0_INSECT_GG3J73P03F1PNW	GO:0009055	GO:0005515	GO:0008152	GO:0016747	GO:0016068	GO:0051536	GO:0004872	GO:0005488	GO:0007155	GO:0007160	GO:0007229	GO:0008305	GO:0005576	GO:0006952	GO:0005525	GO:0005874	GO:0007017
2.0_INSECT_GG3J73P03F1PYR	GO:0009055	GO:0005515	GO:0005576	GO:0009405
2.0_INSECT_GG3J73P03F1Q6S	GO:0009055	GO:0005515	GO:0008152	GO:0016747	GO:0005576	GO:0051536	GO:0006952	GO:0005525	GO:0005874	GO:0007017
2.0_INSECT_GG3J73P03F1QDG	GO:0005515	GO:0009055	GO:0008152	GO:0016747	GO:0051536	GO:0005576	GO:0006952	GO:0004872	GO:0005488	GO:0007155	GO:0007160	GO:0007229	GO:0008305	GO:0009755
2.0_INSECT_GG3J73P03F1QX2	GO:0009055	GO:0005576	GO:0006952	GO:0005515	GO:0051536	GO:0008152	GO:0016747	GO:0005525	GO:0005874	GO:0007017	GO:0004872	GO:0005488	GO:0007155	GO:0007160	GO:0007229	GO:0008305
2.0_INSECT_GG3J73P03F1R3V	GO:0009055	GO:0051536	GO:0005576	GO:0005515	GO:0008152	GO:0016747	GO:0004872	GO:0005488	GO:0007155	GO:0007160	GO:0007229	GO:0008305	GO:0006952	GO:0005525	GO:0005874	GO:0007017
2.0_INSECT_GG3J73P03F1R6W	GO:0009055	GO:0008152	GO:0016747	GO:0005515	GO:0005576
2.0_INSECT_GG3J73P03F1RJJ	GO:0009055	GO:0005576	GO:0005515	GO:0008152	GO:0016747	GO:0051536	GO:0006952	GO:0004872	GO:0005488	GO:0007155	GO:0007160	GO:0007229	GO:0008305
2.0_INSECT_GG3J73P03F1RUK	GO:0008152	GO:0016747	GO:0009055	GO:0005515	GO:0005576	GO:0004872	GO:0005488	GO:0007155	GO:0007160	GO:0007229	GO:0008305	GO:0006952	GO:0051536
2.0_INSECT_GG3J73P03F1RVS	GO:0009055	GO:0005525	GO:0005874	GO:0007017	GO:0005515	GO:0008152	GO:0016747	GO:0051536	GO:0005576	GO:0004872	GO:0005488	GO:0007155	GO:0007160	GO:0007229	GO:0008305	GO:0006952
2.0_INSECT_GG3J73P03F1SG4	GO:0009055	GO:0004872	GO:0005488	GO:0007155	GO:0007160	GO:0007229	GO:0008305	GO:0005576	GO:0005515	GO:0016068	GO:0005525	GO:0005874	GO:0007017	GO:0051536	GO:0005199	GO:0009277	GO:0008152	GO:0016747	GO:0006952
2.0_INSECT_GG3J73P03F1SVF	GO:0008152	GO:0016747	GO:0009055	GO:0005576	GO:0006952	GO:0005515	GO:0051536	GO:0009405	GO:0005525	GO:0005874	GO:0007017	GO:0004872	GO:0005488	GO:0007155	GO:0007160	GO:0007229	GO:0008305
2.0_INSECT_GG3J73P03F1THR	GO:0009055	GO:0005199	GO:0009277	GO:0051536	GO:0005576	GO:0006952	GO:0005515	GO:0004872	GO:0005488	GO:0007155	GO:0007160	GO:0007229	GO:0008305	GO:0008152	GO:0016747	GO:0005044	GO:0016020	GO:0005525	GO:0005874	GO:0007017
2.0_INSECT_GG3J73P03F1U0Z	GO:0009055	GO:0051536	GO:0004872	GO:0005488	GO:0007155	GO:0007160	GO:0007229	GO:0008305	GO:0005576	GO:0005515	GO:0008152	GO:0016747	GO:0006952
2.0_INSECT_GG3J73P03F1UN9	GO:0008152	GO:0016747	GO:0009055	GO:0005515	GO:0051536	GO:0016068	GO:0005576	GO:0005199	GO:0009277	GO:0006952
2.0_INSECT_GG3J73P03F1UR3	GO:0009055	GO:0008152	GO:0016747	GO:0005576	GO:0005515	GO:0051536	GO:0004872	GO:0005488	GO:0007155	GO:0007160	GO:0007229	GO:0008305
2.0_INSECT_GG3J73P03F1V4E	GO:0009055	GO:0008152	GO:0016747	GO:0005576	GO:0006952	GO:0051536	GO:0005515	GO:0004872	GO:0005488	GO:0007155	GO:0007160	GO:0007229	GO:0008305	GO:0046872	GO:0005199	GO:0009277
2.0_INSECT_GG3J73P03F1V68	GO:0009055	GO:0016068	GO:0005515	GO:0051536	GO:0005576	GO:0009755	GO:0004872	GO:0005488	GO:0007155	GO:0007160	GO:0007229	GO:0008305	GO:0006952	GO:0008152	GO:0016747	GO:0005525	GO:0005874	GO:0007017
2.0_INSECT_GG3J73P03F1VQR	GO:0009055	GO:0051536	GO:0005515
2.0_INSECT_GG3J73P03F1VSR	GO:0008152	GO:0016747	GO:0009055	GO:0005576	GO:0006952	GO:0005515	GO:0004872	GO:0005488	GO:0007155	GO:0007160	GO:0007229	GO:0008305	GO:0051536	GO:0005525	GO:0005874	GO:0007017
2.0_INSECT_GG3J73P03F1W5O	GO:0008152	GO:0016747	GO:0009055	GO:0051536	GO:0004872	GO:0005488	GO:0007155	GO:0007160	GO:0007229	GO:0008305	GO:0005576	GO:0005515
2.0_INSECT_GG3J73P03F1W95	GO:0005515	GO:0008152	GO:0016747	GO:0009055	GO:0051536	GO:0005576	GO:0006952	GO:0004872	GO:0005488	GO:0007155	GO:0007160	GO:0007229	GO:0008305	GO:0016068	GO:0005525	GO:0005874	GO:0007017
2.0_INSECT_GG3J73P03F1WET	GO:0009055	GO:0051536	GO:0004872	GO:0005488	GO:0007155	GO:0007160	GO:0007229	GO:0008305	GO:0005576	GO:0006952	GO:0005515
2.0_INSECT_GG3J73P03F1WOP	GO:0009055	GO:0005576	GO:0005515	GO:0008152	GO:0016747	GO:0004872	GO:0005488	GO:0007155	GO:0007160	GO:0007229	GO:0008305	GO:0051536	GO:0005525	GO:0005874	GO:0007017
2.0_INSECT_GG3J73P03F1XLB	GO:0009055	GO:0005515	GO:0008152	GO:0016747	GO:0051536	GO:0005576	GO:0005525	GO:0005874	GO:0007017	GO:0006952	GO:0004872	GO:0005488	GO:0007155	GO:0007160	GO:0007229	GO:0008305
2.0_INSECT_GG3J73P03F1Y43	GO:0008152	GO:0016747	GO:0009055	GO:0051536	GO:0005576	GO:0005515	GO:0004872	GO:0005488	GO:0007155	GO:0007160	GO:0007229	GO:0008305	GO:0005525	GO:0005874	GO:0007017
2.0_INSECT_GG3J73P03F1YVB	GO:0009055	GO:0005515
2.0_INSECT_GG3J73P03F1Z8H	GO:0009055	GO:0051536	GO:0005576	GO:0006952	GO:0005515
2.0_INSECT_GG3J73P03F1ZNN	GO:0009055	GO:0051536	GO:0005576	GO:0005515	GO:0008152	GO:0016747	GO:0004872	GO:0005488	GO:0007155	GO:0007160	GO:0007229	GO:0008305	GO:0006952
2.0_INSECT_GG3J73P03FGGEX	GO:0004872	GO:0005488	GO:0007155	GO:0007160	GO:0007229	GO:0008305	GO:0005576	GO:0006952	GO:0005515	GO:0009055	GO:0051536
2.0_INSECT_GG3J73P03FGGJ9	GO:0009055	GO:0051536
2.0_INSECT_GG3J73P03FGH60	GO:0009055	GO:0005576	GO:0006952	GO:0005515
2.0_INSECT_GG3J73P03F21GS	GO:0005515	GO:0009055	GO:0051536
2.0_INSECT_GG3J73P03F234W	GO:0008152	GO:0016747	GO:0009055	GO:0005515	GO:0005576	GO:0046872	GO:0051536	GO:0004872	GO:0005488	GO:0007155	GO:0007160	GO:0007229	GO:0008305
2.0_INSECT_GG3J73P03F2385	GO:0009055	GO:0008152	GO:0016747	GO:0005515	GO:0004872	GO:0005488	GO:0007155	GO:0007160	GO:0007229	GO:0008305	GO:0005576	GO:0006952	GO:0005199	GO:0009277	GO:0051536	GO:0005525	GO:0005874	GO:0007017
2.0_INSECT_GG3J73P03F23E2	GO:0008152	GO:0016747	GO:0009055	GO:0005515
2.0_INSECT_GG3J73P03F24MT	GO:0008152	GO:0016747	GO:0009055	GO:0005576	GO:0005515	GO:0051536	GO:0004872	GO:0005488	GO:0007155	GO:0007160	GO:0007229	GO:0008305
2.0_INSECT_GG3J73P03F25FZ	GO:0009055	GO:0005515	GO:0005576
2.0_INSECT_GG3J73P03F25JG	GO:0008152	GO:0016747	GO:0005515	GO:0009055	GO:0051536	GO:0005576	GO:0005525	GO:0005874	GO:0007017	GO:0004872	GO:0005488	GO:0007155	GO:0007160	GO:0007229	GO:0008305	GO:0006952
2.0_INSECT_GG3J73P03F25SF	GO:0009055	GO:0008152	GO:0016747	GO:0016068	GO:0051536	GO:0005515	GO:0005576	GO:0004872	GO:0005488	GO:0007155	GO:0007160	GO:0007229	GO:0008305	GO:0005525	GO:0005874	GO:0007017	GO:0005199	GO:0009277
2.0_INSECT_GG3J73P03F262G	GO:0008152	GO:0016747	GO:0009055	GO:0051536	GO:0005576	GO:0005515	GO:0005525	GO:0005874	GO:0007017
2.0_INSECT_GG3J73P03F26D9	GO:0008152	GO:0016747	GO:0009055	GO:0005576	GO:0005515
2.0_INSECT_GG3J73P03F26EK	GO:0005576
2.0_INSECT_GG3J73P03F26R4	GO:0005515	GO:0005576	GO:0008152	GO:0016747	GO:0009055	GO:0051536	GO:0004872	GO:0005488	GO:0007155	GO:0007160	GO:0007229	GO:0008305
2.0_INSECT_GG3J73P03F26RE	GO:0005576	GO:0005515
2.0_INSECT_GG3J73P03F271Y	GO:0005576	GO:0005515
2.0_INSECT_GG3J73P03F27LH	GO:0009055	GO:0008152	GO:0016747	GO:0004872	GO:0005488	GO:0007155	GO:0007160	GO:0007229	GO:0008305	GO:0005576	GO:0005515	GO:0051536	GO:0006952	GO:0009755
2.0_INSECT_GG3J73P03F27MZ	GO:0009055	GO:0051536	GO:0005515	GO:0008152	GO:0016747	GO:0005576	GO:0016068	GO:0004872	GO:0005488	GO:0007155	GO:0007160	GO:0007229	GO:0008305	GO:0005525	GO:0005874	GO:0007017	GO:0006952
2.0_INSECT_GG3J73P03F27V4	GO:0005576	GO:0005515	GO:0004872	GO:0005488	GO:0007155	GO:0007160	GO:0007229	GO:0008305	GO:0009055	GO:0008152	GO:0016747	GO:0051536	GO:0006952	GO:0005525	GO:0005874	GO:0007017
2.0_INSECT_GG3J73P03F288K	GO:0009055	GO:0005576
2.0_INSECT_GG3J73P03F28EF	GO:0009055
2.0_INSECT_GG3J73P03F2905	GO:0009055	GO:0008152	GO:0016747	GO:0005515	GO:0005576
2.0_INSECT_GG3J73P03F292D	GO:0009055	GO:0008152	GO:0016747	GO:0005515	GO:0051536	GO:0005576	GO:0006952
2.0_INSECT_GG3J73P03F29G9	GO:0008152	GO:0016747	GO:0009055	GO:0005515
2.0_INSECT_GG3J73P03F2AOT	GO:0005576	GO:0008152	GO:0016747	GO:0009055	GO:0005515	GO:0051536	GO:0005525	GO:0005874	GO:0007017	GO:0004872	GO:0005488	GO:0007155	GO:0007160	GO:0007229	GO:0008305	GO:0009405	GO:0009755	GO:0006952	GO:0005199	GO:0009277
2.0_INSECT_GG3J73P03F2AXR	GO:0009055	GO:0005576	GO:0005515
2.0_INSECT_GG3J73P03F2CFJ	GO:0005515	GO:0009055	GO:0051536	GO:0005576	GO:0006952	GO:0008152	GO:0016747	GO:0016068	GO:0005199	GO:0009277	GO:0004872	GO:0005488	GO:0007155	GO:0007160	GO:0007229	GO:0008305	GO:0005525	GO:0005874	GO:0007017	GO:0009755
2.0_INSECT_GG3J73P03F2D5B	GO:0009055	GO:0051536	GO:0005515
2.0_INSECT_GG3J73P03F2EZ3	GO:0009055	GO:0051536	GO:0005515	GO:0004872	GO:0005488	GO:0007155	GO:0007160	GO:0007229	GO:0008305	GO:0005576	GO:0006952	GO:0008152	GO:0016747	GO:0016068
2.0_INSECT_GG3J73P03F2F3B	GO:0008152	GO:0016747	GO:0009055	GO:0005515
2.0_INSECT_GG3J73P03F2GJR	GO:0005576	GO:0008152	GO:0016747	GO:0009055	GO:0005525	GO:0005874	GO:0007017	GO:0051536	GO:0005515
2.0_INSECT_GG3J73P03F2GN3	GO:0005576	GO:0008152	GO:0016747	GO:0005515	GO:0009055	GO:0051536	GO:0005525	GO:0005874	GO:0007017	GO:0016068	GO:0006952	GO:0004872	GO:0005488	GO:0007155	GO:0007160	GO:0007229	GO:0008305	GO:0005199	GO:0009277
2.0_INSECT_GG3J73P03F2GSR	GO:0009055	GO:0005525	GO:0005874	GO:0007017	GO:0005576	GO:0005515	GO:0051536	GO:0008152	GO:0016747	GO:0004872	GO:0005488	GO:0007155	GO:0007160	GO:0007229	GO:0008305	GO:0006952
2.0_INSECT_GG3J73P03F2H5N	GO:0009055	GO:0051536	GO:0005576	GO:0005515	GO:0008152	GO:0016747	GO:0005525	GO:0005874	GO:0007017	GO:0006952	GO:0004872	GO:0005488	GO:0007155	GO:0007160	GO:0007229	GO:0008305	GO:0016068
2.0_INSECT_GG3J73P03F2HRT	GO:0009055	GO:0005576	GO:0005515	GO:0005525	GO:0005874	GO:0007017	GO:0008152	GO:0016747	GO:0004872	GO:0005488	GO:0007155	GO:0007160	GO:0007229	GO:0008305	GO:0006952	GO:0051536
2.0_INSECT_GG3J73P03F2IHV	GO:0009055
2.0_INSECT_GG3J73P03F2IIH	GO:0009055	GO:0051536	GO:0005515	GO:0008152	GO:0016747	GO:0005576
2.0_INSECT_GG3J73P03F2INL	GO:0008152	GO:0016747	GO:0009055	GO:0005515	GO:0051536	GO:0005576	GO:0005199	GO:0009277	GO:0005525	GO:0005874	GO:0007017	GO:0004872	GO:0005488	GO:0007155	GO:0007160	GO:0007229	GO:0008305	GO:0006952
2.0_INSECT_GG3J73P03F2JHB	GO:0009055	GO:0016068
2.0_INSECT_GG3J73P03F2K2E	GO:0008152	GO:0016747	GO:0005576	GO:0005515	GO:0009055	GO:0051536	GO:0005525	GO:0005874	GO:0007017	GO:0004872	GO:0005488	GO:0007155	GO:0007160	GO:0007229	GO:0008305
2.0_INSECT_GG3J73P03F2KPN	GO:0008152	GO:0016747
2.0_INSECT_GG3J73P03F2LB3	GO:0008152	GO:0016747	GO:0009055	GO:0005576
2.0_INSECT_GG3J73P03F2M54	GO:0005576	GO:0005515	GO:0009055	GO:0005525	GO:0005874	GO:0007017	GO:0008152	GO:0016747
2.0_INSECT_GG3J73P03F2M5R	GO:0009055
2.0_INSECT_GG3J73P03F2MI1	GO:0005525	GO:0005874	GO:0007017	GO:0005515	GO:0009055	GO:0005576	GO:0006952
2.0_INSECT_GG3J73P03F2N7V	GO:0009055
2.0_INSECT_GG3J73P03F2NAA	GO:0005515	GO:0008152	GO:0016747	GO:0009055	GO:0005576	GO:0051536	GO:0016068	GO:0004872	GO:0005488	GO:0007155	GO:0007160	GO:0007229	GO:0008305
2.0_INSECT_GG3J73P03F2NME	GO:0005576	GO:0009055	GO:0051536	GO:0016068	GO:0005515	GO:0008152	GO:0016747	GO:0005525	GO:0005874	GO:0007017	GO:0006952	GO:0001558	GO:0005520
2.0_INSECT_GG3J73P03F2NNB	GO:0009055	GO:0051536	GO:0005515	GO:0005576	GO:0006952	GO:0004872	GO:0005488	GO:0007155	GO:0007160	GO:0007229	GO:0008305	GO:0009755	GO:0008152	GO:0016747
2.0_INSECT_GG3J73P03F2OCU	GO:0008152	GO:0016747	GO:0009055	GO:0016068	GO:0005576	GO:0005515	GO:0004872	GO:0005488	GO:0007155	GO:0007160	GO:0007229	GO:0008305	GO:0006952	GO:0051536
2.0_INSECT_GG3J73P03F2OUD	GO:0009055	GO:0008152	GO:0016747	GO:0005576	GO:0005515	GO:0051536	GO:0005525	GO:0005874	GO:0007017	GO:0004872	GO:0005488	GO:0007155	GO:0007160	GO:0007229	GO:0008305	GO:0006952
2.0_INSECT_GG3J73P03F2P4M	GO:0009055	GO:0005576	GO:0005515	GO:0006952	GO:0008152	GO:0016747	GO:0051536	GO:0004872	GO:0005488	GO:0007155	GO:0007160	GO:0007229	GO:0008305
2.0_INSECT_GG3J73P03F2Q0S	GO:0008152	GO:0016747	GO:0009055	GO:0051536	GO:0005576	GO:0005515	GO:0005525	GO:0005874	GO:0007017
2.0_INSECT_GG3J73P03F2QD5	GO:0008152	GO:0016747	GO:0009055	GO:0004872	GO:0005488	GO:0007155	GO:0007160	GO:0007229	GO:0008305	GO:0005576	GO:0006952	GO:0005515	GO:0042309	GO:0050825	GO:0050826	GO:0051536
2.0_INSECT_GG3J73P03F2R7N	GO:0009055	GO:0005515	GO:0004872	GO:0005488	GO:0007155	GO:0007160	GO:0007229	GO:0008305	GO:0008152	GO:0016747	GO:0051536	GO:0005576	GO:0006952	GO:0046872
2.0_INSECT_GG3J73P03F2RWQ	GO:0009055	GO:0005199	GO:0009277
2.0_INSECT_GG3J73P03F2T04	GO:0009055	GO:0005515
2.0_INSECT_GG3J73P03F2TIO	GO:0009055	GO:0005576	GO:0005515	GO:0004872	GO:0005488	GO:0007155	GO:0007160	GO:0007229	GO:0008305	GO:0006952	GO:0005525	GO:0005874	GO:0007017	GO:0016068	GO:0008152	GO:0016747	GO:0051536
2.0_INSECT_GG3J73P03F2TUV	GO:0009055	GO:0005525	GO:0005874	GO:0007017	GO:0005515	GO:0005576	GO:0006952
2.0_INSECT_GG3J73P03F2TXB	GO:0008152	GO:0016747	GO:0009055	GO:0051536	GO:0005576	GO:0005515
2.0_INSECT_GG3J73P03F2U5Q	GO:0005576	GO:0009055	GO:0005515	GO:0008152	GO:0016747	GO:0006952	GO:0004872	GO:0005488	GO:0007155	GO:0007160	GO:0007229	GO:0008305
2.0_INSECT_GG3J73P03F2UD7	GO:0009055
2.0_INSECT_GG3J73P03F2V51	GO:0008152	GO:0016747	GO:0009055	GO:0051536	GO:0005576	GO:0005515	GO:0005525	GO:0005874	GO:0007017	GO:0006952	GO:0004872	GO:0005488	GO:0007155	GO:0007160	GO:0007229	GO:0008305
2.0_INSECT_GG3J73P03F2VD2	GO:0009055	GO:0008152	GO:0016747	GO:0005515	GO:0051536	GO:0005576	GO:0006952	GO:0005199	GO:0009277	GO:0005525	GO:0005874	GO:0007017	GO:0046872	GO:0004872	GO:0005488	GO:0007155	GO:0007160	GO:0007229	GO:0008305
2.0_INSECT_GG3J73P03F2VRW	GO:0009055	GO:0005515	GO:0051536	GO:0004872	GO:0005488	GO:0007155	GO:0007160	GO:0007229	GO:0008305	GO:0005576	GO:0006952
2.0_INSECT_GG3J73P03F2W54	GO:0009055	GO:0005515	GO:0008152	GO:0016747
2.0_INSECT_GG3J73P03F2WQF	GO:0008152	GO:0016747	GO:0009055	GO:0005576	GO:0005515
2.0_INSECT_GG3J73P03F2XI7	GO:0009055	GO:0051536	GO:0005576	GO:0005515	GO:0008152	GO:0016747	GO:0006952	GO:0005525	GO:0005874	GO:0007017	GO:0016068	GO:0004872	GO:0005488	GO:0007155	GO:0007160	GO:0007229	GO:0008305
2.0_INSECT_GG3J73P03F2XO1	GO:0009055	GO:0051536	GO:0005576	GO:0005515	GO:0009405	GO:0008152	GO:0016747	GO:0004872	GO:0005488	GO:0007155	GO:0007160	GO:0007229	GO:0008305	GO:0006952	GO:0005199	GO:0009277
2.0_INSECT_GG3J73P03F2Y19	GO:0009055	GO:0005525	GO:0005874	GO:0007017	GO:0008152	GO:0016747	GO:0005576	GO:0005515	GO:0009405	GO:0006952	GO:0051536	GO:0005199	GO:0009277	GO:0009755
2.0_INSECT_GG3J73P03F2Y2H	GO:0009055	GO:0008152	GO:0016747	GO:0051536	GO:0005525	GO:0005874	GO:0007017	GO:0005515	GO:0005576	GO:0006952	GO:0005199	GO:0009277
2.0_INSECT_GG3J73P03F2Y9K	GO:0008152	GO:0016747	GO:0009055	GO:0005576	GO:0005515	GO:0051536	GO:0006952	GO:0005525	GO:0005874	GO:0007017	GO:0004872	GO:0005488	GO:0007155	GO:0007160	GO:0007229	GO:0008305
2.0_INSECT_GG3J73P03F2YAG	GO:0005576	GO:0008152	GO:0016747	GO:0009055	GO:0005515	GO:0006952
2.0_INSECT_GG3J73P03F2YEJ	GO:0009055	GO:0005576	GO:0005515	GO:0006952	GO:0008152	GO:0016747	GO:0051536	GO:0005525	GO:0005874	GO:0007017
2.0_INSECT_GG3J73P03F2Z5K	GO:0004872	GO:0005488	GO:0007155	GO:0007160	GO:0007229	GO:0008305	GO:0009055
2.0_INSECT_GG3J73P03F2ZSB	GO:0009055	GO:0051536
2.0_INSECT_GG3J73P03F2ZWZ	GO:0005515
2.0_INSECT_GG3J73P03F30AM	GO:0009055	GO:0005576	GO:0005515
2.0_INSECT_GG3J73P03F30UL	GO:0009055	GO:0008152	GO:0016747	GO:0005515	GO:0051536	GO:0005576	GO:0006952	GO:0004872	GO:0005488	GO:0007155	GO:0007160	GO:0007229	GO:0008305
2.0_INSECT_GG3J73P03F30WQ	GO:0009055	GO:0005576	GO:0006952	GO:0005515	GO:0008152	GO:0016747	GO:0051536	GO:0004872	GO:0005488	GO:0007155	GO:0007160	GO:0007229	GO:0008305	GO:0005525	GO:0005874	GO:0007017
2.0_INSECT_GG3J73P03F314U	GO:0005576	GO:0005515	GO:0009055	GO:0008152	GO:0016747	GO:0005525	GO:0005874	GO:0007017	GO:0004872	GO:0005488	GO:0007155	GO:0007160	GO:0007229	GO:0008305	GO:0006952	GO:0051536	GO:0009755
2.0_INSECT_GG3J73P03F31L1	GO:0008152	GO:0016747	GO:0009055	GO:0005576	GO:0005515	GO:0051536	GO:0004872	GO:0005488	GO:0007155	GO:0007160	GO:0007229	GO:0008305	GO:0006952
2.0_INSECT_GG3J73P03F31OQ	GO:0009055	GO:0005199	GO:0009277	GO:0005576	GO:0005515	GO:0051536	GO:0008152	GO:0016747	GO:0004872	GO:0005488	GO:0007155	GO:0007160	GO:0007229	GO:0008305	GO:0005525	GO:0005874	GO:0007017
2.0_INSECT_GG3J73P03F3GH4	GO:0009055	GO:0051536	GO:0005576	GO:0005515
2.0_INSECT_GG3J73P03F32ZJ	GO:0009055	GO:0005515	GO:0005576	GO:0009405	GO:0004872	GO:0005488	GO:0007155	GO:0007160	GO:0007229	GO:0008305	GO:0005525	GO:0005874	GO:0007017	GO:0008152	GO:0016747	GO:0051536	GO:0001558	GO:0005520	GO:0006952
2.0_INSECT_GG3J73P03F33HS	GO:0009055	GO:0051536	GO:0005525	GO:0005874	GO:0007017	GO:0005515	GO:0005576	GO:0006952	GO:0004872	GO:0005488	GO:0007155	GO:0007160	GO:0007229	GO:0008305	GO:0008152	GO:0016747
2.0_INSECT_GG3J73P03F33KY	GO:0009055	GO:0005576	GO:0006952	GO:0005515	GO:0008152	GO:0016747	GO:0004872	GO:0005488	GO:0007155	GO:0007160	GO:0007229	GO:0008305	GO:0042309	GO:0050825	GO:0050826
2.0_INSECT_GG3J73P03F33P0	GO:0009055	GO:0005525	GO:0005874	GO:0007017	GO:0005515	GO:0005576	GO:0006952
2.0_INSECT_GG3J73P03F33QR	GO:0009055	GO:0051536	GO:0004872	GO:0005488	GO:0007155	GO:0007160	GO:0007229	GO:0008305	GO:0005576	GO:0005515	GO:0008152	GO:0016747	GO:0006952	GO:0046872
2.0_INSECT_GG3J73P03F34ZL	GO:0009055	GO:0005576	GO:0005515	GO:0051536	GO:0008152	GO:0016747	GO:0006952	GO:0004872	GO:0005488	GO:0007155	GO:0007160	GO:0007229	GO:0008305
2.0_INSECT_GG3J73P03F35CI	GO:0009055
2.0_INSECT_GG3J73P03F35ZA	GO:0008152	GO:0016747	GO:0009055
2.0_INSECT_GG3J73P03F36PX	GO:0009055	GO:0051536	GO:0004872	GO:0005488	GO:0007155	GO:0007160	GO:0007229	GO:0008305	GO:0005515	GO:0005576	GO:0008152	GO:0016747	GO:0006952
2.0_INSECT_GG3J73P03F36Q1	GO:0008152	GO:0016747	GO:0009055
2.0_INSECT_GG3J73P03F377N	GO:0009055	GO:0005515
2.0_INSECT_GG3J73P03F37OY	GO:0009055	GO:0005576	GO:0005515	GO:0051536	GO:0004872	GO:0005488	GO:0007155	GO:0007160	GO:0007229	GO:0008305	GO:0008152	GO:0016747	GO:0006952	GO:0005525	GO:0005874	GO:0007017
2.0_INSECT_GG3J73P03F37QT	GO:0008152	GO:0016747	GO:0009055	GO:0005576	GO:0006952	GO:0005515	GO:0051536	GO:0005525	GO:0005874	GO:0007017
2.0_INSECT_GG3J73P03F38GE	GO:0009055	GO:0005576	GO:0006952	GO:0005515
2.0_INSECT_GG3J73P03F39G4	GO:0009055	GO:0005525	GO:0005874	GO:0007017	GO:0005576	GO:0005515
2.0_INSECT_GG3J73P03F39TV	GO:0009055	GO:0051536	GO:0005515	GO:0004872	GO:0005488	GO:0007155	GO:0007160	GO:0007229	GO:0008305	GO:0005525	GO:0005874	GO:0007017	GO:0005576	GO:0006952	GO:0008152	GO:0016747
2.0_INSECT_GG3J73P03F3A39	GO:0009055	GO:0005515	GO:0004872	GO:0005488	GO:0007155	GO:0007160	GO:0007229	GO:0008305	GO:0005576	GO:0006952	GO:0008152	GO:0016747
2.0_INSECT_GG3J73P03F3A6U	GO:0009055	GO:0005515	GO:0008152	GO:0016747	GO:0051536	GO:0004872	GO:0005488	GO:0007155	GO:0007160	GO:0007229	GO:0008305	GO:0005576	GO:0006952	GO:0046872	GO:0003676	GO:0008270
2.0_INSECT_GG3J73P03F3AOS	GO:0009055	GO:0005576	GO:0005515	GO:0051536	GO:0008152	GO:0016747	GO:0004872	GO:0005488	GO:0007155	GO:0007160	GO:0007229	GO:0008305	GO:0006952
2.0_INSECT_GG3J73P03F3B4M	GO:0009055	GO:0051536	GO:0005515
2.0_INSECT_GG3J73P03F3BWW	GO:0009055	GO:0051536
2.0_INSECT_GG3J73P03F3DA2	GO:0009055	GO:0051536	GO:0005576	GO:0006952	GO:0005515
2.0_INSECT_GG3J73P03F3DEN	GO:0008152	GO:0016747	GO:0009055	GO:0005576	GO:0005515
2.0_INSECT_GG3J73P03F3DHI	GO:0009055	GO:0005576	GO:0005515
2.0_INSECT_GG3J73P03F3DIK	GO:0009055	GO:0008152	GO:0016747	GO:0005576	GO:0005515	GO:0051536	GO:0004872	GO:0005488	GO:0007155	GO:0007160	GO:0007229	GO:0008305
2.0_INSECT_GG3J73P03F3DQ9	GO:0009055	GO:0005576	GO:0005515	GO:0008152	GO:0016747	GO:0051536	GO:0006952
2.0_INSECT_GG3J73P03F3EYI	GO:0009055	GO:0051536	GO:0005515	GO:0008152	GO:0016747	GO:0005576	GO:0004872	GO:0005488	GO:0007155	GO:0007160	GO:0007229	GO:0008305	GO:0006952
2.0_INSECT_GG3J73P03F3EZD	GO:0009055	GO:0005576	GO:0005515
2.0_INSECT_GG3J73P03F3F2U	GO:0009055	GO:0005576	GO:0005515
2.0_INSECT_GG3J73P03F3FBY	GO:0008152	GO:0016747	GO:0005515	GO:0009055	GO:0005576	GO:0006952	GO:0051536	GO:0016068
2.0_INSECT_GG3J73P03F3FRV	GO:0009055	GO:0051536	GO:0005515	GO:0004872	GO:0005488	GO:0007155	GO:0007160	GO:0007229	GO:0008305	GO:0005576	GO:0006952	GO:0008152	GO:0016747	GO:0016068
2.0_INSECT_GG3J73P03F3G3E	GO:0009055	GO:0005515
2.0_INSECT_GG3J73P03F3GTT	GO:0008152	GO:0016747	GO:0005576	GO:0006952
2.0_INSECT_GG3J73P03F3H6Z	GO:0005515	GO:0009055	GO:0008152	GO:0016747	GO:0051536	GO:0004872	GO:0005488	GO:0007155	GO:0007160	GO:0007229	GO:0008305
2.0_INSECT_GG3J73P03F3IAH	GO:0008152	GO:0016747	GO:0005515	GO:0009055	GO:0051536	GO:0005576	GO:0006952
2.0_INSECT_GG3J73P03F3IED	GO:0009055	GO:0005515	GO:0005576	GO:0004872	GO:0005488	GO:0007155	GO:0007160	GO:0007229	GO:0008305	GO:0051536	GO:0006952	GO:0008152	GO:0016747
2.0_INSECT_GG3J73P03F3IFQ	GO:0008152	GO:0016747	GO:0009055	GO:0051536	GO:0004872	GO:0005488	GO:0007155	GO:0007160	GO:0007229	GO:0008305	GO:0005576	GO:0005515	GO:0006952	GO:0046872
2.0_INSECT_GG3J73P03F3J1Z	GO:0005515	GO:0009055
2.0_INSECT_GG3J73P03F3JOW	GO:0009055	GO:0051536	GO:0005525	GO:0005874	GO:0007017	GO:0004872	GO:0005488	GO:0007155	GO:0007160	GO:0007229	GO:0008305	GO:0005515	GO:0008152	GO:0016747	GO:0005576
2.0_INSECT_GG3J73P03F3JW7	GO:0009055	GO:0005576	GO:0008152	GO:0016747	GO:0004872	GO:0005488	GO:0007155	GO:0007160	GO:0007229	GO:0008305	GO:0005515	GO:0051536	GO:0005525	GO:0005874	GO:0007017	GO:0006952
2.0_INSECT_GG3J73P03F3KRV	GO:0005576	GO:0005515	GO:0008152	GO:0016747	GO:0009055	GO:0051536	GO:0005525	GO:0005874	GO:0007017	GO:0004872	GO:0005488	GO:0007155	GO:0007160	GO:0007229	GO:0008305
2.0_INSECT_GG3J73P03F3L53	GO:0009055	GO:0005576	GO:0008152	GO:0016747	GO:0051536	GO:0005515	GO:0004252	GO:0006508	GO:0006952	GO:0005525	GO:0005874	GO:0007017
2.0_INSECT_GG3J73P03F3LDF	GO:0009055	GO:0005515	GO:0005576	GO:0051536	GO:0004872	GO:0005488	GO:0007155	GO:0007160	GO:0007229	GO:0008305	GO:0006952	GO:0008152	GO:0016747
2.0_INSECT_GG3J73P03F3LJN	GO:0008152	GO:0016747	GO:0009055	GO:0004872	GO:0005488	GO:0007155	GO:0007160	GO:0007229	GO:0008305	GO:0005515
2.0_INSECT_GG3J73P03F3MLF	GO:0009055	GO:0005515
2.0_INSECT_GG3J73P03F3MOE	GO:0009055	GO:0051536	GO:0005576	GO:0005515	GO:0008152	GO:0016747	GO:0004872	GO:0005488	GO:0007155	GO:0007160	GO:0007229	GO:0008305	GO:0004252	GO:0006508	GO:0005525	GO:0005874	GO:0007017	GO:0006952
2.0_INSECT_GG3J73P03F3MQA	GO:0009055	GO:0005515	GO:0051536	GO:0005576	GO:0006952
2.0_INSECT_GG3J73P03F3MXF	GO:0009055	GO:0051536	GO:0004872	GO:0005488	GO:0007155	GO:0007160	GO:0007229	GO:0008305	GO:0005576	GO:0005515
2.0_INSECT_GG3J73P03F3NDZ	GO:0005576	GO:0005515
2.0_INSECT_GG3J73P03F3OBC	GO:0009055	GO:0005515	GO:0051536	GO:0005576	GO:0001558	GO:0005520	GO:0008152	GO:0016747	GO:0004872	GO:0005488	GO:0007155	GO:0007160	GO:0007229	GO:0008305	GO:0006952	GO:0005525	GO:0005874	GO:0007017
2.0_INSECT_GG3J73P03F3OTY	GO:0008152	GO:0016747	GO:0009055	GO:0004872	GO:0005488	GO:0007155	GO:0007160	GO:0007229	GO:0008305	GO:0005576
2.0_INSECT_GG3J73P03F3PEI	GO:0009055	GO:0051536	GO:0005515	GO:0008152	GO:0016747	GO:0005576	GO:0004872	GO:0005488	GO:0007155	GO:0007160	GO:0007229	GO:0008305	GO:0006952	GO:0005044	GO:0016020	GO:0005525	GO:0005874	GO:0007017
2.0_INSECT_GG3J73P03F3PEU	GO:0008152	GO:0016747	GO:0009055	GO:0005515	GO:0004872	GO:0005488	GO:0007155	GO:0007160	GO:0007229	GO:0008305	GO:0005576	GO:0051536
2.0_INSECT_GG3J73P03F3PJD	GO:0005515
2.0_INSECT_GG3J73P03F3PST	GO:0009055	GO:0005576	GO:0005515	GO:0008152	GO:0016747
2.0_INSECT_GG3J73P03F3QHW	GO:0009055
2.0_INSECT_GG3J73P03F3SAI	GO:0008152	GO:0016747	GO:0009055	GO:0051536
2.0_INSECT_GG3J73P03F3SVM	GO:0009055	GO:0051536	GO:0004872	GO:0005488	GO:0007155	GO:0007160	GO:0007229	GO:0008305	GO:0005576	GO:0006952	GO:0005515	GO:0008152	GO:0016747	GO:0005525	GO:0005874	GO:0007017
2.0_INSECT_GG3J73P03F3T09	GO:0009055	GO:0051536	GO:0005515	GO:0005576	GO:0006952	GO:0016068	GO:0008152	GO:0016747
2.0_INSECT_GG3J73P03F3U6Q	GO:0008152	GO:0016747	GO:0009055	GO:0005576	GO:0005515	GO:0004872	GO:0005488	GO:0007155	GO:0007160	GO:0007229	GO:0008305	GO:0005525	GO:0005874	GO:0007017	GO:0051536	GO:0046872	GO:0006952
2.0_INSECT_GG3J73P03F3V6C	GO:0009055	GO:0005576	GO:0005525	GO:0005874	GO:0007017	GO:0008152	GO:0016747	GO:0005515	GO:0051536	GO:0006952	GO:0004872	GO:0005488	GO:0007155	GO:0007160	GO:0007229	GO:0008305	GO:0009755
2.0_INSECT_GG3J73P03F3VHJ	GO:0046872	GO:0009055	GO:0005576	GO:0005515	GO:0016068	GO:0051536	GO:0004872	GO:0005488	GO:0007155	GO:0007160	GO:0007229	GO:0008305	GO:0008152	GO:0016747	GO:0005525	GO:0005874	GO:0007017
2.0_INSECT_GG3J73P03F3VQ8	GO:0008152	GO:0016747	GO:0009055	GO:0005515	GO:0005576	GO:0006952
2.0_INSECT_GG3J73P03F3VSP	GO:0009055	GO:0004872	GO:0005488	GO:0007155	GO:0007160	GO:0007229	GO:0008305	GO:0005515	GO:0005576	GO:0005525	GO:0005874	GO:0007017	GO:0051536	GO:0008152	GO:0016747
2.0_INSECT_GG3J73P03F3VU4	GO:0009055	GO:0004872	GO:0005488	GO:0007155	GO:0007160	GO:0007229	GO:0008305	GO:0051536	GO:0005515	GO:0005576	GO:0009405	GO:0008152	GO:0016747	GO:0006952
2.0_INSECT_GG3J73P03F3W0W	GO:0008152	GO:0016747	GO:0005515	GO:0009055	GO:0005576	GO:0006952	GO:0051536	GO:0004872	GO:0005488	GO:0007155	GO:0007160	GO:0007229	GO:0008305	GO:0005199	GO:0009277	GO:0005525	GO:0005874	GO:0007017
2.0_INSECT_GG3J73P03F3X5U	GO:0008152	GO:0016747	GO:0009055	GO:0004872	GO:0005488	GO:0007155	GO:0007160	GO:0007229	GO:0008305	GO:0005576	GO:0005515	GO:0051536
2.0_INSECT_GG3J73P03F3Y0U	GO:0009055	GO:0051536	GO:0005515
2.0_INSECT_GG3J73P03F3YPZ	GO:0009055	GO:0004872	GO:0005488	GO:0007155	GO:0007160	GO:0007229	GO:0008305	GO:0005515
2.0_INSECT_GG3J73P03F3YWH	GO:0009055	GO:0005576	GO:0006952	GO:0005515	GO:0004872	GO:0005488	GO:0007155	GO:0007160	GO:0007229	GO:0008305	GO:0051536	GO:0008152	GO:0016747	GO:0005525	GO:0005874	GO:0007017
2.0_INSECT_GG3J73P03F3Z1Q	GO:0009055	GO:0004872	GO:0005488	GO:0007155	GO:0007160	GO:0007229	GO:0008305	GO:0005515	GO:0008152	GO:0016747	GO:0051536	GO:0005576	GO:0006952	GO:0046872
2.0_INSECT_GG3J73P03F3Z8A	GO:0008152	GO:0016747	GO:0009055	GO:0005515
2.0_INSECT_GG3J73P03F3Z9J	GO:0004872	GO:0005488	GO:0007155	GO:0007160	GO:0007229	GO:0008305	GO:0008152	GO:0016747	GO:0005515
2.0_INSECT_GG3J73P03F3ZAN	GO:0009055	GO:0005515	GO:0008152	GO:0016747	GO:0051536	GO:0004872	GO:0005488	GO:0007155	GO:0007160	GO:0007229	GO:0008305	GO:0005576	GO:0005199	GO:0009277
2.0_INSECT_GG3J73P03F3ZLY	GO:0005576	GO:0009055	GO:0016068	GO:0005525	GO:0005874	GO:0007017	GO:0006952	GO:0005515	GO:0008152	GO:0016747	GO:0051536	GO:0004872	GO:0005488	GO:0007155	GO:0007160	GO:0007229	GO:0008305
2.0_INSECT_GG3J73P03F401K	GO:0008152	GO:0016747	GO:0042309	GO:0050825	GO:0050826	GO:0005576	GO:0006952	GO:0005515	GO:0009055	GO:0004872	GO:0005488	GO:0007155	GO:0007160	GO:0007229	GO:0008305	GO:0051536	GO:0009755
2.0_INSECT_GG3J73P03F403R	GO:0009055	GO:0051536	GO:0004872	GO:0005488	GO:0007155	GO:0007160	GO:0007229	GO:0008305	GO:0005515	GO:0046872	GO:0005576
2.0_INSECT_GG3J73P03F4049	GO:0009055	GO:0005515	GO:0005525	GO:0005874	GO:0007017	GO:0004872	GO:0005488	GO:0007155	GO:0007160	GO:0007229	GO:0008305	GO:0005576	GO:0006952	GO:0009755	GO:0008152	GO:0016747	GO:0051536	GO:0046872
2.0_INSECT_GG3J73P03F42QW	GO:0005515	GO:0008152	GO:0016747	GO:0009055	GO:0005576	GO:0051536	GO:0004872	GO:0005488	GO:0007155	GO:0007160	GO:0007229	GO:0008305
2.0_INSECT_GG3J73P03F4337	GO:0008152	GO:0016747	GO:0005515	GO:0009055	GO:0051536	GO:0004872	GO:0005488	GO:0007155	GO:0007160	GO:0007229	GO:0008305	GO:0005576	GO:0016068
2.0_INSECT_GG3J73P03F435E	GO:0008152	GO:0016747	GO:0005515
2.0_INSECT_GG3J73P03F43CB	GO:0008152	GO:0016747	GO:0009055	GO:0005576	GO:0051536	GO:0004872	GO:0005488	GO:0007155	GO:0007160	GO:0007229	GO:0008305	GO:0005515	GO:0006952	GO:0005525	GO:0005874	GO:0007017
2.0_INSECT_GG3J73P03F43CF	GO:0009055	GO:0005515	GO:0005576	GO:0006952	GO:0051536	GO:0005525	GO:0005874	GO:0007017	GO:0004872	GO:0005488	GO:0007155	GO:0007160	GO:0007229	GO:0008305	GO:0008152	GO:0016747	GO:0005199	GO:0009277
2.0_INSECT_GG3J73P03F43IH	GO:0009055	GO:0005576	GO:0005515
2.0_INSECT_GG3J73P03F43M0	GO:0008152	GO:0016747	GO:0009055	GO:0051536	GO:0005576	GO:0006952	GO:0005515
2.0_INSECT_GG3J73P03F43NC	GO:0008152	GO:0016747	GO:0009055	GO:0005515	GO:0051536	GO:0005525	GO:0005874	GO:0007017
2.0_INSECT_GG3J73P03F44AG	GO:0008152	GO:0016747	GO:0009055
2.0_INSECT_GG3J73P03F44I4	GO:0009055	GO:0005515	GO:0005576	GO:0006952	GO:0051536	GO:0008152	GO:0016747
2.0_INSECT_GG3J73P03F44OC	GO:0009055	GO:0008152	GO:0016747	GO:0005515	GO:0005576	GO:0004872	GO:0005488	GO:0007155	GO:0007160	GO:0007229	GO:0008305	GO:0005525	GO:0005874	GO:0007017	GO:0006952	GO:0051536
2.0_INSECT_GG3J73P03F45Z4	GO:0009055
2.0_INSECT_GG3J73P03F46FO	GO:0008152	GO:0016747	GO:0009055	GO:0051536	GO:0005576	GO:0005515	GO:0006952	GO:0005525	GO:0005874	GO:0007017	GO:0004872	GO:0005488	GO:0007155	GO:0007160	GO:0007229	GO:0008305
2.0_INSECT_GG3J73P03F46KU	GO:0009055	GO:0008152	GO:0016747	GO:0005576	GO:0051536	GO:0006952	GO:0005515	GO:0004872	GO:0005488	GO:0007155	GO:0007160	GO:0007229	GO:0008305
2.0_INSECT_GG3J73P03F46PF	GO:0005515	GO:0008152	GO:0016747	GO:0005525	GO:0005874	GO:0007017	GO:0005576	GO:0009055	GO:0051536	GO:0004872	GO:0005488	GO:0007155	GO:0007160	GO:0007229	GO:0008305
2.0_INSECT_GG3J73P03F474D	GO:0009055	GO:0005576	GO:0005515	GO:0051536	GO:0006952	GO:0008152	GO:0016747	GO:0004872	GO:0005488	GO:0007155	GO:0007160	GO:0007229	GO:0008305	GO:0005525	GO:0005874	GO:0007017
2.0_INSECT_GG3J73P03F47E7	GO:0009055	GO:0008152	GO:0016747	GO:0005515	GO:0005576	GO:0006952
2.0_INSECT_GG3J73P03F492V	GO:0008152	GO:0016747	GO:0009055	GO:0051536	GO:0005576	GO:0006952	GO:0005515
2.0_INSECT_GG3J73P03F4AP6	GO:0009055	GO:0005576	GO:0005515	GO:0046872	GO:0051536	GO:0005199	GO:0009277	GO:0008152	GO:0016747	GO:0004872	GO:0005488	GO:0007155	GO:0007160	GO:0007229	GO:0008305	GO:0006952	GO:0005525	GO:0005874	GO:0007017
2.0_INSECT_GG3J73P03F4APY	GO:0005515	GO:0008152	GO:0016747	GO:0009055	GO:0005576	GO:0004872	GO:0005488	GO:0007155	GO:0007160	GO:0007229	GO:0008305	GO:0005525	GO:0005874	GO:0007017	GO:0051536	GO:0006952	GO:0016068
2.0_INSECT_GG3J73P03F4ATM	GO:0008152	GO:0016747	GO:0009055	GO:0051536	GO:0005515	GO:0005576	GO:0005525	GO:0005874	GO:0007017	GO:0004872	GO:0005488	GO:0007155	GO:0007160	GO:0007229	GO:0008305	GO:0006952
2.0_INSECT_GG3J73P03F4AVY	GO:0009055	GO:0005576	GO:0006952	GO:0005515	GO:0051536	GO:0008152	GO:0016747	GO:0004872	GO:0005488	GO:0007155	GO:0007160	GO:0007229	GO:0008305
2.0_INSECT_GG3J73P03F4BCT	GO:0008152	GO:0016747	GO:0005525	GO:0005874	GO:0007017
2.0_INSECT_GG3J73P03F4CMN	GO:0005199	GO:0009277	GO:0005576	GO:0005515	GO:0008152	GO:0016747	GO:0009055	GO:0051536	GO:0005525	GO:0005874	GO:0007017	GO:0004872	GO:0005488	GO:0007155	GO:0007160	GO:0007229	GO:0008305	GO:0001558	GO:0005520	GO:0006952
2.0_INSECT_GG3J73P03F4CZC	GO:0046872	GO:0008152	GO:0016747	GO:0004872	GO:0005488	GO:0007155	GO:0007160	GO:0007229	GO:0008305	GO:0005576	GO:0005515	GO:0009405	GO:0009055	GO:0005525	GO:0005874	GO:0007017	GO:0051536	GO:0006952
2.0_INSECT_GG3J73P03F4DOA	GO:0005515	GO:0009055	GO:0005576	GO:0051536	GO:0008152	GO:0016747	GO:0005199	GO:0009277	GO:0004872	GO:0005488	GO:0007155	GO:0007160	GO:0007229	GO:0008305	GO:0005525	GO:0005874	GO:0007017
2.0_INSECT_GG3J73P03F4EI5	GO:0009055	GO:0051536	GO:0005515	GO:0005576	GO:0006952
2.0_INSECT_GG3J73P03F4GCF	GO:0009055	GO:0005515	GO:0008152	GO:0016747	GO:0051536	GO:0005576	GO:0005525	GO:0005874	GO:0007017	GO:0004872	GO:0005488	GO:0007155	GO:0007160	GO:0007229	GO:0008305
2.0_INSECT_GG3J73P03F4GSS	GO:0008152	GO:0016747	GO:0009055	GO:0005515	GO:0051536	GO:0005576	GO:0004872	GO:0005488	GO:0007155	GO:0007160	GO:0007229	GO:0008305	GO:0005525	GO:0005874	GO:0007017	GO:0006952	GO:0046872
2.0_INSECT_GG3J73P03F4HJ4	GO:0008152	GO:0016747	GO:0016068	GO:0005576	GO:0009055	GO:0005515	GO:0005199	GO:0009277	GO:0004872	GO:0005488	GO:0007155	GO:0007160	GO:0007229	GO:0008305	GO:0051536	GO:0006952	GO:0005525	GO:0005874	GO:0007017	GO:0046872
2.0_INSECT_GG3J73P03F4HNI	GO:0008152	GO:0016747	GO:0009055	GO:0005515	GO:0051536	GO:0005576	GO:0004872	GO:0005488	GO:0007155	GO:0007160	GO:0007229	GO:0008305	GO:0005525	GO:0005874	GO:0007017	GO:0006952	GO:0009755
2.0_INSECT_GG3J73P03F4I2V	GO:0009055	GO:0051536	GO:0005576	GO:0005515	GO:0004872	GO:0005488	GO:0007155	GO:0007160	GO:0007229	GO:0008305	GO:0008152	GO:0016747
2.0_INSECT_GG3J73P03F4I7P	GO:0009055	GO:0008152	GO:0016747	GO:0005576	GO:0005515	GO:0051536	GO:0004872	GO:0005488	GO:0007155	GO:0007160	GO:0007229	GO:0008305	GO:0006952	GO:0005525	GO:0005874	GO:0007017
2.0_INSECT_GG3J73P03F4ICO	GO:0009055	GO:0051536	GO:0008152	GO:0016747	GO:0005576	GO:0005515	GO:0004872	GO:0005488	GO:0007155	GO:0007160	GO:0007229	GO:0008305	GO:0006952	GO:0005525	GO:0005874	GO:0007017	GO:0016068
2.0_INSECT_GG3J73P03F4IE5	GO:0009055	GO:0051536	GO:0004872	GO:0005488	GO:0007155	GO:0007160	GO:0007229	GO:0008305	GO:0005576	GO:0005515	GO:0008152	GO:0016747	GO:0006952	GO:0009755	GO:0005525	GO:0005874	GO:0007017
2.0_INSECT_GG3J73P03F4ISJ	GO:0008152	GO:0016747	GO:0009055	GO:0005576	GO:0016068	GO:0005515	GO:0051536	GO:0009755	GO:0042309	GO:0050825	GO:0050826	GO:0005199	GO:0009277	GO:0005525	GO:0005874	GO:0007017
2.0_INSECT_GG3J73P03F4IXJ	GO:0005515	GO:0008152	GO:0016747
2.0_INSECT_GG3J73P03F4J4H	GO:0009055	GO:0005576	GO:0005515	GO:0008152	GO:0016747	GO:0004872	GO:0005488	GO:0007155	GO:0007160	GO:0007229	GO:0008305	GO:0051536	GO:0042309	GO:0050825	GO:0050826	GO:0006952
2.0_INSECT_GG3J73P03F4J6L	GO:0008152	GO:0016747	GO:0009055	GO:0005576	GO:0005515	GO:0051536	GO:0004872	GO:0005488	GO:0007155	GO:0007160	GO:0007229	GO:0008305	GO:0006952	GO:0046872	GO:0005525	GO:0005874	GO:0007017
2.0_INSECT_GG3J73P03F4JEC	GO:0009055	GO:0051536	GO:0004872	GO:0005488	GO:0007155	GO:0007160	GO:0007229	GO:0008305	GO:0005576	GO:0006952	GO:0005515	GO:0009755	GO:0009405	GO:0005525	GO:0005874	GO:0007017	GO:0008152	GO:0016747
2.0_INSECT_GG3J73P03F4JFQ	GO:0009055	GO:0005576	GO:0006952
2.0_INSECT_GG3J73P03F4K80	GO:0009055	GO:0051536	GO:0005576	GO:0005515
2.0_INSECT_GG3J73P03F4KB0	GO:0009055	GO:0008152	GO:0016747	GO:0051536	GO:0005576	GO:0005515	GO:0005525	GO:0005874	GO:0007017	GO:0004872	GO:0005488	GO:0007155	GO:0007160	GO:0007229	GO:0008305	GO:0006952
2.0_INSECT_GG3J73P03F4KHX	GO:0005515	GO:0009055	GO:0051536	GO:0004872	GO:0005488	GO:0007155	GO:0007160	GO:0007229	GO:0008305	GO:0005576	GO:0008152	GO:0016747	GO:0005525	GO:0005874	GO:0007017	GO:0046872	GO:0001558	GO:0005520	GO:0006952
2.0_INSECT_GG3J73P03F4KLS	GO:0009055	GO:0005515
2.0_INSECT_GG3J73P03F4LJ7	GO:0009055	GO:0005576
2.0_INSECT_GG3J73P03F4LQB	GO:0009055	GO:0008152	GO:0016747	GO:0051536
2.0_INSECT_GG3J73P03F4M4R	GO:0008152	GO:0016747	GO:0009055	GO:0051536	GO:0005576	GO:0005515	GO:0006952	GO:0005525	GO:0005874	GO:0007017
2.0_INSECT_GG3J73P03F4MJ2	GO:0008152	GO:0016747	GO:0009055	GO:0005576	GO:0006952	GO:0005515	GO:0051536	GO:0004872	GO:0005488	GO:0007155	GO:0007160	GO:0007229	GO:0008305	GO:0004252	GO:0006508
2.0_INSECT_GG3J73P03F4NU5	GO:0008152	GO:0016747	GO:0005576	GO:0009055	GO:0005515	GO:0003676	GO:0008270	GO:0004872	GO:0005488	GO:0007155	GO:0007160	GO:0007229	GO:0008305
2.0_INSECT_GG3J73P03F4QCO	GO:0005515
2.0_INSECT_GG3J73P03F4QYV	GO:0005576
2.0_INSECT_GG3J73P03F4R0B	GO:0009055
2.0_INSECT_GG3J73P03F4RCD	GO:0009055	GO:0004872	GO:0005488	GO:0007155	GO:0007160	GO:0007229	GO:0008305	GO:0005576	GO:0006952	GO:0005515	GO:0051536	GO:0008152	GO:0016747	GO:0005525	GO:0005874	GO:0007017
2.0_INSECT_GG3J73P03F4RDL	GO:0009055	GO:0004872	GO:0005488	GO:0007155	GO:0007160	GO:0007229	GO:0008305	GO:0005515	GO:0051536	GO:0008152	GO:0016747	GO:0005576
2.0_INSECT_GG3J73P03F4RXQ	GO:0009055	GO:0051536	GO:0005576	GO:0005515	GO:0008152	GO:0016747	GO:0004872	GO:0005488	GO:0007155	GO:0007160	GO:0007229	GO:0008305	GO:0005525	GO:0005874	GO:0007017
2.0_INSECT_GG3J73P03F4SNX	GO:0008152	GO:0016747	GO:0009055	GO:0051536	GO:0004872	GO:0005488	GO:0007155	GO:0007160	GO:0007229	GO:0008305	GO:0005515	GO:0005576	GO:0006952	GO:0005525	GO:0005874	GO:0007017	GO:0009755
2.0_INSECT_GG3J73P03F4SOQ	GO:0008152	GO:0016747	GO:0009055	GO:0051536	GO:0005576	GO:0005515	GO:0046872	GO:0001558	GO:0005520	GO:0006952
2.0_INSECT_GG3J73P03F4T0B	GO:0008152	GO:0016747	GO:0009055	GO:0005515
2.0_INSECT_GG3J73P03F4T3H	GO:0009055	GO:0051536	GO:0005576	GO:0005515
2.0_INSECT_GG3J73P03F4TNM	GO:0008152	GO:0016747	GO:0009055	GO:0005576
2.0_INSECT_GG3J73P03F4TVU	GO:0008152	GO:0016747	GO:0009055	GO:0051536	GO:0004872	GO:0005488	GO:0007155	GO:0007160	GO:0007229	GO:0008305	GO:0005515
2.0_INSECT_GG3J73P03F4U5A	GO:0008152	GO:0016747	GO:0009055	GO:0005515	GO:0005576	GO:0051536	GO:0006952	GO:0004872	GO:0005488	GO:0007155	GO:0007160	GO:0007229	GO:0008305	GO:0005525	GO:0005874	GO:0007017
2.0_INSECT_GG3J73P03F4UYE	GO:0005576
2.0_INSECT_GG3J73P03F4VK5	GO:0005576	GO:0006952	GO:0005515	GO:0009055	GO:0008152	GO:0016747	GO:0051536	GO:0016068	GO:0005525	GO:0005874	GO:0007017
2.0_INSECT_GG3J73P03F4WT3	GO:0009055	GO:0051536	GO:0005576	GO:0005515	GO:0005525	GO:0005874	GO:0007017	GO:0008152	GO:0016747	GO:0006952	GO:0004872	GO:0005488	GO:0007155	GO:0007160	GO:0007229	GO:0008305	GO:0016068	GO:0005199	GO:0009277
2.0_INSECT_GG3J73P03F4X1E	GO:0005515	GO:0009055	GO:0005576	GO:0006952	GO:0046872	GO:0051536	GO:0004872	GO:0005488	GO:0007155	GO:0007160	GO:0007229	GO:0008305	GO:0008152	GO:0016747	GO:0005525	GO:0005874	GO:0007017	GO:0004252	GO:0006508
2.0_INSECT_GG3J73P03F4X4X	GO:0009055	GO:0004872	GO:0005488	GO:0007155	GO:0007160	GO:0007229	GO:0008305	GO:0005576	GO:0005515
2.0_INSECT_GG3J73P03F4XI1	GO:0009055
2.0_INSECT_GG3J73P03F4Y7U	GO:0005515	GO:0005576	GO:0005525	GO:0005874	GO:0007017	GO:0008152	GO:0016747	GO:0009055	GO:0051536	GO:0004872	GO:0005488	GO:0007155	GO:0007160	GO:0007229	GO:0008305	GO:0006952
2.0_INSECT_GG3J73P03F4Z1K	GO:0009055	GO:0005576	GO:0005515	GO:0008152	GO:0016747	GO:0051536	GO:0006952	GO:0004872	GO:0005488	GO:0007155	GO:0007160	GO:0007229	GO:0008305	GO:0005525	GO:0005874	GO:0007017
2.0_INSECT_GG3J73P03F4ZLM	GO:0009055	GO:0008152	GO:0016747
2.0_INSECT_GG3J73P03F50CG	GO:0009055	GO:0051536	GO:0005525	GO:0005874	GO:0007017	GO:0005576	GO:0006952	GO:0005515	GO:0008152	GO:0016747	GO:0004872	GO:0005488	GO:0007155	GO:0007160	GO:0007229	GO:0008305
2.0_INSECT_GG3J73P03F50N5	GO:0009055	GO:0008152	GO:0016747	GO:0005515	GO:0004872	GO:0005488	GO:0007155	GO:0007160	GO:0007229	GO:0008305	GO:0051536	GO:0005525	GO:0005874	GO:0007017	GO:0005576	GO:0016068	GO:0006952
2.0_INSECT_GG3J73P03F50OF	GO:0009055	GO:0051536	GO:0005515	GO:0008152	GO:0016747	GO:0005576	GO:0005525	GO:0005874	GO:0007017	GO:0004872	GO:0005488	GO:0007155	GO:0007160	GO:0007229	GO:0008305	GO:0006952
2.0_INSECT_GG3J73P03F51PN	GO:0009055	GO:0005525	GO:0005874	GO:0007017	GO:0005515
2.0_INSECT_GG3J73P03F51ZI	GO:0009055	GO:0005576	GO:0006952	GO:0008152	GO:0016747	GO:0005515	GO:0051536	GO:0004872	GO:0005488	GO:0007155	GO:0007160	GO:0007229	GO:0008305	GO:0016068	GO:0005525	GO:0005874	GO:0007017	GO:0009405	GO:0005199	GO:0009277
2.0_INSECT_GG3J73P03F522S	GO:0009055	GO:0008152	GO:0016747	GO:0005515	GO:0051536	GO:0005199	GO:0009277	GO:0005576	GO:0006952	GO:0004872	GO:0005488	GO:0007155	GO:0007160	GO:0007229	GO:0008305	GO:0005525	GO:0005874	GO:0007017
2.0_INSECT_GG3J73P03F52BE	GO:0009055	GO:0005576	GO:0051536
2.0_INSECT_GG3J73P03F52G0	GO:0046872	GO:0008152	GO:0016747	GO:0005515
2.0_INSECT_GG3J73P03F53VO	GO:0005515	GO:0008152	GO:0016747	GO:0009055	GO:0005576	GO:0005525	GO:0005874	GO:0007017	GO:0004872	GO:0005488	GO:0007155	GO:0007160	GO:0007229	GO:0008305	GO:0006952	GO:0051536
2.0_INSECT_GG3J73P03F549Z	GO:0009055	GO:0005576	GO:0006952	GO:0051536	GO:0005515	GO:0008152	GO:0016747	GO:0004872	GO:0005488	GO:0007155	GO:0007160	GO:0007229	GO:0008305	GO:0005525	GO:0005874	GO:0007017	GO:0009755
2.0_INSECT_GG3J73P03F55RD	GO:0005576	GO:0005515	GO:0009055
2.0_INSECT_GG3J73P03F55TC	GO:0009055	GO:0008152	GO:0016747	GO:0005576	GO:0005515
2.0_INSECT_GG3J73P03F55WX	GO:0009055	GO:0005515	GO:0005576	GO:0006952	GO:0008152	GO:0016747	GO:0051536	GO:0004872	GO:0005488	GO:0007155	GO:0007160	GO:0007229	GO:0008305	GO:0005525	GO:0005874	GO:0007017
2.0_INSECT_GG3J73P03F5655	GO:0004872	GO:0005488	GO:0007155	GO:0007160	GO:0007229	GO:0008305	GO:0005515	GO:0005576	GO:0006952	GO:0009055	GO:0005525	GO:0005874	GO:0007017	GO:0051536	GO:0008152	GO:0016747
2.0_INSECT_GG3J73P03F565Y	GO:0008152	GO:0016747	GO:0009055	GO:0005515
2.0_INSECT_GG3J73P03F5727	GO:0009055
2.0_INSECT_GG3J73P03F576U	GO:0009055	GO:0005576	GO:0006952	GO:0004872	GO:0005488	GO:0007155	GO:0007160	GO:0007229	GO:0008305	GO:0005515	GO:0008152	GO:0016747	GO:0051536	GO:0005525	GO:0005874	GO:0007017
2.0_INSECT_GG3J73P03F5793	GO:0009055	GO:0005576	GO:0005515	GO:0008152	GO:0016747	GO:0004872	GO:0005488	GO:0007155	GO:0007160	GO:0007229	GO:0008305	GO:0051536	GO:0006952	GO:0005525	GO:0005874	GO:0007017
2.0_INSECT_GG3J73P03F58Z2	GO:0009055	GO:0004872	GO:0005488	GO:0007155	GO:0007160	GO:0007229	GO:0008305	GO:0005576	GO:0005515
2.0_INSECT_GG3J73P03F593J	GO:0008152	GO:0016747	GO:0009055	GO:0005576	GO:0006952	GO:0005515	GO:0051536	GO:0004872	GO:0005488	GO:0007155	GO:0007160	GO:0007229	GO:0008305
2.0_INSECT_GG3J73P03F59L5	GO:0009055	GO:0051536	GO:0004872	GO:0005488	GO:0007155	GO:0007160	GO:0007229	GO:0008305	GO:0005515
2.0_INSECT_GG3J73P03F5BIX	GO:0008152	GO:0016747	GO:0009055	GO:0005515	GO:0051536	GO:0004872	GO:0005488	GO:0007155	GO:0007160	GO:0007229	GO:0008305	GO:0005576	GO:0005525	GO:0005874	GO:0007017	GO:0006952
2.0_INSECT_GG3J73P03F5BR0	GO:0009055	GO:0005515	GO:0042309	GO:0050825	GO:0050826	GO:0008152	GO:0016747	GO:0005576	GO:0005199	GO:0009277	GO:0051536	GO:0006952
2.0_INSECT_GG3J73P03F5BRS	GO:0008152	GO:0016747	GO:0009055
2.0_INSECT_GG3J73P03F5BWA	GO:0008152	GO:0016747	GO:0009055	GO:0051536	GO:0005515	GO:0005576	GO:0006952	GO:0005525	GO:0005874	GO:0007017	GO:0004872	GO:0005488	GO:0007155	GO:0007160	GO:0007229	GO:0008305
2.0_INSECT_GG3J73P03F5C37	GO:0008152	GO:0016747	GO:0005515	GO:0009055	GO:0005576	GO:0051536	GO:0004872	GO:0005488	GO:0007155	GO:0007160	GO:0007229	GO:0008305	GO:0006952	GO:0016068	GO:0005525	GO:0005874	GO:0007017
2.0_INSECT_GG3J73P03F5CHO	GO:0009055	GO:0005515	GO:0051536	GO:0005576	GO:0006952	GO:0004872	GO:0005488	GO:0007155	GO:0007160	GO:0007229	GO:0008305	GO:0008152	GO:0016747	GO:0003735	GO:0005622	GO:0005840	GO:0006412
2.0_INSECT_GG3J73P03F5CQU	GO:0009055	GO:0051536	GO:0005576	GO:0006952	GO:0008152	GO:0016747	GO:0005515	GO:0004872	GO:0005488	GO:0007155	GO:0007160	GO:0007229	GO:0008305	GO:0005525	GO:0005874	GO:0007017
2.0_INSECT_GG3J73P03F5D22	GO:0008152	GO:0016747	GO:0009055	GO:0005515	GO:0051536	GO:0004872	GO:0005488	GO:0007155	GO:0007160	GO:0007229	GO:0008305	GO:0005576	GO:0006952	GO:0005525	GO:0005874	GO:0007017	GO:0005199	GO:0009277
2.0_INSECT_GG3J73P03F5DD6	GO:0009055	GO:0005576	GO:0006952	GO:0005515	GO:0008152	GO:0016747	GO:0051536	GO:0004872	GO:0005488	GO:0007155	GO:0007160	GO:0007229	GO:0008305
2.0_INSECT_GG3J73P03F5DPH	GO:0005515	GO:0008152	GO:0016747	GO:0005525	GO:0005874	GO:0007017
2.0_INSECT_GG3J73P03F5F82	GO:0009055	GO:0004872	GO:0005488	GO:0007155	GO:0007160	GO:0007229	GO:0008305	GO:0005515	GO:0008152	GO:0016747	GO:0051536
2.0_INSECT_GG3J73P03F5GBD	GO:0005515	GO:0009055	GO:0005576	GO:0005525	GO:0005874	GO:0007017
2.0_INSECT_GG3J73P03F5GMC	GO:0004872	GO:0005488	GO:0007155	GO:0007160	GO:0007229	GO:0008305	GO:0008152	GO:0016747	GO:0009055	GO:0005576	GO:0005515
2.0_INSECT_GG3J73P03F5HTO	GO:0004872	GO:0005488	GO:0007155	GO:0007160	GO:0007229	GO:0008305	GO:0009055	GO:0005576
2.0_INSECT_GG3J73P03F5JFH	GO:0009055	GO:0051536	GO:0005576	GO:0006952	GO:0005515
2.0_INSECT_GG3J73P03F5JVG	GO:0009055
2.0_INSECT_GG3J73P03F5K26	GO:0009055	GO:0051536	GO:0005525	GO:0005874	GO:0007017	GO:0005515	GO:0008152	GO:0016747	GO:0005576	GO:0004872	GO:0005488	GO:0007155	GO:0007160	GO:0007229	GO:0008305	GO:0006952	GO:0005199	GO:0009277
2.0_INSECT_GG3J73P03F5KV6	GO:0009055	GO:0005515
2.0_INSECT_GG3J73P03F5KZ3	GO:0008152	GO:0016747	GO:0005576	GO:0009055	GO:0005515	GO:0004872	GO:0005488	GO:0007155	GO:0007160	GO:0007229	GO:0008305	GO:0006952	GO:0051536	GO:0005525	GO:0005874	GO:0007017
2.0_INSECT_GG3J73P03F5L9L	GO:0005515	GO:0009055	GO:0051536	GO:0005576	GO:0008152	GO:0016747
2.0_INSECT_GG3J73P03F5M1A	GO:0005576	GO:0009055	GO:0051536	GO:0005515	GO:0008152	GO:0016747
2.0_INSECT_GG3J73P03F5M3S	GO:0009055	GO:0005515	GO:0008152	GO:0016747	GO:0051536	GO:0005576	GO:0006952	GO:0004872	GO:0005488	GO:0007155	GO:0007160	GO:0007229	GO:0008305
2.0_INSECT_GG3J73P03F5MNH	GO:0008152	GO:0016747	GO:0009055	GO:0051536	GO:0005576	GO:0005515	GO:0004872	GO:0005488	GO:0007155	GO:0007160	GO:0007229	GO:0008305	GO:0005525	GO:0005874	GO:0007017	GO:0006952	GO:0004252	GO:0006508
2.0_INSECT_GG3J73P03F5MUU	GO:0009055	GO:0005515	GO:0005576	GO:0006952	GO:0008152	GO:0016747	GO:0005525	GO:0005874	GO:0007017	GO:0051536	GO:0016068
2.0_INSECT_GG3J73P03F5NGM	GO:0009055	GO:0005515
2.0_INSECT_GG3J73P03F5NJK	GO:0008152	GO:0016747	GO:0005515	GO:0009055	GO:0005525	GO:0005874	GO:0007017	GO:0005576	GO:0051536	GO:0004872	GO:0005488	GO:0007155	GO:0007160	GO:0007229	GO:0008305
2.0_INSECT_GG3J73P03F5NJO	GO:0005515
2.0_INSECT_GG3J73P03F5NPQ	GO:0009055	GO:0051536	GO:0005576	GO:0005515	GO:0008152	GO:0016747	GO:0004872	GO:0005488	GO:0007155	GO:0007160	GO:0007229	GO:0008305	GO:0006952	GO:0009755	GO:0005525	GO:0005874	GO:0007017
2.0_INSECT_GG3J73P03F5OY5	GO:0008152	GO:0016747	GO:0009055	GO:0051536	GO:0005576	GO:0006952	GO:0005515	GO:0004872	GO:0005488	GO:0007155	GO:0007160	GO:0007229	GO:0008305	GO:0005525	GO:0005874	GO:0007017
2.0_INSECT_GG3J73P03F5PXH	GO:0009055
2.0_INSECT_GG3J73P03F5PZH	GO:0009055	GO:0051536	GO:0004872	GO:0005488	GO:0007155	GO:0007160	GO:0007229	GO:0008305	GO:0005576	GO:0005515	GO:0006952
2.0_INSECT_GG3J73P03F5QA7	GO:0005576	GO:0005515	GO:0008152	GO:0016747	GO:0009055	GO:0005525	GO:0005874	GO:0007017	GO:0004872	GO:0005488	GO:0007155	GO:0007160	GO:0007229	GO:0008305	GO:0006952	GO:0051536
2.0_INSECT_GG3J73P03F5QD5	GO:0009055	GO:0005515	GO:0005576	GO:0008152	GO:0016747	GO:0006952	GO:0046872	GO:0051536	GO:0004872	GO:0005488	GO:0007155	GO:0007160	GO:0007229	GO:0008305	GO:0016068	GO:0005525	GO:0005874	GO:0007017
2.0_INSECT_GG3J73P03F5QI5	GO:0009055
2.0_INSECT_GG3J73P03F5QPS	GO:0009055	GO:0005576	GO:0006952	GO:0005515	GO:0051536	GO:0004872	GO:0005488	GO:0007155	GO:0007160	GO:0007229	GO:0008305	GO:0005525	GO:0005874	GO:0007017	GO:0008152	GO:0016747	GO:0005199	GO:0009277	GO:0004252	GO:0006508
2.0_INSECT_GG3J73P03F5RGC	GO:0046872	GO:0009055	GO:0051536	GO:0005576	GO:0005515
2.0_INSECT_GG3J73P03F5RMW	GO:0009055	GO:0051536	GO:0005515	GO:0008152	GO:0016747
2.0_INSECT_GG3J73P03F5RSI	GO:0009055	GO:0005515
2.0_INSECT_GG3J73P03F5SAG	GO:0004872	GO:0005488	GO:0007155	GO:0007160	GO:0007229	GO:0008305	GO:0005576	GO:0005515	GO:0008152	GO:0016747	GO:0009055	GO:0051536	GO:0006952	GO:0005525	GO:0005874	GO:0007017
2.0_INSECT_GG3J73P03F5SRC	GO:0008152	GO:0016747	GO:0005576	GO:0009055	GO:0051536	GO:0005515
2.0_INSECT_GG3J73P03F5SWF	GO:0009055
2.0_INSECT_GG3J73P03F5T4X	GO:0009055	GO:0005576	GO:0008152	GO:0016747	GO:0005515	GO:0051536	GO:0006952	GO:0004872	GO:0005488	GO:0007155	GO:0007160	GO:0007229	GO:0008305
2.0_INSECT_GG3J73P03F5THU	GO:0009055
2.0_INSECT_GG3J73P03F5UB5	GO:0009055	GO:0004872	GO:0005488	GO:0007155	GO:0007160	GO:0007229	GO:0008305	GO:0005576	GO:0005515
2.0_INSECT_GG3J73P03F5V3P	GO:0009055	GO:0051536
2.0_INSECT_GG3J73P03F5V9T	GO:0009055	GO:0005515	GO:0051536	GO:0005576	GO:0006952	GO:0008152	GO:0016747
2.0_INSECT_GG3J73P03F5VK8	GO:0005515	GO:0008152	GO:0016747	GO:0009055
2.0_INSECT_GG3J73P03F5VUP	GO:0005515
2.0_INSECT_GG3J73P03F5W3K	GO:0009055	GO:0051536	GO:0005525	GO:0005874	GO:0007017	GO:0004872	GO:0005488	GO:0007155	GO:0007160	GO:0007229	GO:0008305	GO:0005199	GO:0009277	GO:0005515	GO:0005576
2.0_INSECT_GG3J73P03F5WAV	GO:0005515
2.0_INSECT_GG3J73P03F5WR2	GO:0009055	GO:0051536	GO:0005515	GO:0005525	GO:0005874	GO:0007017	GO:0005576	GO:0004872	GO:0005488	GO:0007155	GO:0007160	GO:0007229	GO:0008305	GO:0008152	GO:0016747	GO:0006952	GO:0016068
2.0_INSECT_GG3J73P03F5XHV	GO:0005515	GO:0009055	GO:0051536	GO:0005576	GO:0008152	GO:0016747	GO:0006952	GO:0005525	GO:0005874	GO:0007017	GO:0004872	GO:0005488	GO:0007155	GO:0007160	GO:0007229	GO:0008305	GO:0042309	GO:0050825	GO:0050826	GO:0009755
2.0_INSECT_GG3J73P03F5XX9	GO:0009055	GO:0051536	GO:0005576	GO:0006952	GO:0005515	GO:0008152	GO:0016747
2.0_INSECT_GG3J73P03F5XXQ	GO:0009055	GO:0005525	GO:0005874	GO:0007017	GO:0008152	GO:0016747	GO:0051536	GO:0005576	GO:0005515	GO:0006952	GO:0004872	GO:0005488	GO:0007155	GO:0007160	GO:0007229	GO:0008305	GO:0046872
2.0_INSECT_GG3J73P03F5YHV	GO:0005576	GO:0006952	GO:0005515	GO:0009755	GO:0009055	GO:0008152	GO:0016747	GO:0051536	GO:0005199	GO:0009277	GO:0005525	GO:0005874	GO:0007017	GO:0004872	GO:0005488	GO:0007155	GO:0007160	GO:0007229	GO:0008305
2.0_INSECT_GG3J73P03F5YO4	GO:0008152	GO:0016747	GO:0009055	GO:0051536	GO:0005515	GO:0005576	GO:0006952	GO:0005525	GO:0005874	GO:0007017
2.0_INSECT_GG3J73P03F5YVF	GO:0009055	GO:0005576	GO:0005515	GO:0051536	GO:0008152	GO:0016747	GO:0005525	GO:0005874	GO:0007017	GO:0006952
2.0_INSECT_GG3J73P03F5Z7X	GO:0008152	GO:0016747	GO:0009055	GO:0051536	GO:0005515	GO:0004872	GO:0005488	GO:0007155	GO:0007160	GO:0007229	GO:0008305
2.0_INSECT_GG3J73P03F5ZAL	GO:0009055	GO:0005576	GO:0005515	GO:0006952	GO:0008152	GO:0016747
2.0_INSECT_GG3J73P03F5ZMO	GO:0009055	GO:0008152	GO:0016747	GO:0005576	GO:0005515	GO:0016068	GO:0005525	GO:0005874	GO:0007017	GO:0004872	GO:0005488	GO:0007155	GO:0007160	GO:0007229	GO:0008305	GO:0051536	GO:0006952	GO:0042309	GO:0050825	GO:0050826
2.0_INSECT_GG3J73P03F5ZT5	GO:0009055	GO:0005199	GO:0009277	GO:0005515	GO:0051536	GO:0005576	GO:0008152	GO:0016747	GO:0046872	GO:0006952	GO:0005525	GO:0005874	GO:0007017	GO:0004872	GO:0005488	GO:0007155	GO:0007160	GO:0007229	GO:0008305	GO:0016068
2.0_INSECT_GG3J73P03F5ZTI	GO:0009055	GO:0008152	GO:0016747	GO:0005515
2.0_INSECT_GG3J73P03F60VP	GO:0009055	GO:0051536	GO:0004872	GO:0005488	GO:0007155	GO:0007160	GO:0007229	GO:0008305	GO:0005576	GO:0005515	GO:0008152	GO:0016747	GO:0016068	GO:0005199	GO:0009277	GO:0006952	GO:0005525	GO:0005874	GO:0007017
2.0_INSECT_GG3J73P03F614D	GO:0008152	GO:0016747	GO:0009055	GO:0005576	GO:0005525	GO:0005874	GO:0007017	GO:0005515	GO:0006952	GO:0051536	GO:0046872
2.0_INSECT_GG3J73P03F61U4	GO:0009055	GO:0005576
2.0_INSECT_GG3J73P03F61ZZ	GO:0005515	GO:0008152	GO:0016747
2.0_INSECT_GG3J73P03F640D	GO:0009055	GO:0051536	GO:0005576
2.0_INSECT_GG3J73P03F648A	GO:0008152	GO:0016747	GO:0009055	GO:0005576	GO:0004872	GO:0005488	GO:0007155	GO:0007160	GO:0007229	GO:0008305	GO:0005515	GO:0051536	GO:0006952
2.0_INSECT_GG3J73P03F649W	GO:0009055	GO:0051536	GO:0005515	GO:0004872	GO:0005488	GO:0007155	GO:0007160	GO:0007229	GO:0008305	GO:0005576	GO:0008152	GO:0016747	GO:0005525	GO:0005874	GO:0007017	GO:0006952
2.0_INSECT_GG3J73P03F64RI	GO:0046872	GO:0004872	GO:0005488	GO:0007155	GO:0007160	GO:0007229	GO:0008305	GO:0005576	GO:0005515	GO:0009055	GO:0005525	GO:0005874	GO:0007017
2.0_INSECT_GG3J73P03F65WV	GO:0009055	GO:0051536	GO:0005576	GO:0006952	GO:0005515	GO:0016068	GO:0008152	GO:0016747	GO:0005525	GO:0005874	GO:0007017	GO:0004872	GO:0005488	GO:0007155	GO:0007160	GO:0007229	GO:0008305	GO:0009405	GO:0009755	GO:0004252	GO:0006508
2.0_INSECT_GG3J73P03F6637	GO:0008152	GO:0016747	GO:0005525	GO:0005874	GO:0007017	GO:0005515	GO:0009055	GO:0051536	GO:0005576	GO:0004872	GO:0005488	GO:0007155	GO:0007160	GO:0007229	GO:0008305	GO:0006952
2.0_INSECT_GG3J73P03F66RN	GO:0009055
2.0_INSECT_GG3J73P03F66VB	GO:0008152	GO:0016747	GO:0009055	GO:0005525	GO:0005874	GO:0007017	GO:0005576	GO:0006952	GO:0005515	GO:0051536	GO:0005199	GO:0009277
2.0_INSECT_GG3J73P03F67OD	GO:0009055	GO:0005515
2.0_INSECT_GG3J73P03F6838	GO:0008152	GO:0016747	GO:0009055	GO:0005515
2.0_INSECT_GG3J73P03F68O0	GO:0009055	GO:0051536	GO:0005515
2.0_INSECT_GG3J73P03F694O	GO:0009055	GO:0008152	GO:0016747	GO:0005515
2.0_INSECT_GG3J73P03F6985	GO:0009055	GO:0051536	GO:0005515	GO:0004872	GO:0005488	GO:0007155	GO:0007160	GO:0007229	GO:0008305	GO:0005576	GO:0016068	GO:0008152	GO:0016747	GO:0005525	GO:0005874	GO:0007017	GO:0006952
2.0_INSECT_GG3J73P03F6AJG	GO:0008152	GO:0016747	GO:0009055	GO:0051536	GO:0005515	GO:0004872	GO:0005488	GO:0007155	GO:0007160	GO:0007229	GO:0008305	GO:0005576	GO:0006952
2.0_INSECT_GG3J73P03F6C8U	GO:0008152	GO:0016747	GO:0009055	GO:0005576	GO:0005525	GO:0005874	GO:0007017	GO:0005199	GO:0009277	GO:0005515	GO:0051536	GO:0004872	GO:0005488	GO:0007155	GO:0007160	GO:0007229	GO:0008305	GO:0006952
2.0_INSECT_GG3J73P03F6CA0	GO:0005515
2.0_INSECT_GG3J73P03F6CPC	GO:0008152	GO:0016747	GO:0009055	GO:0005576	GO:0005515	GO:0051536
2.0_INSECT_GG3J73P03F6CPG	GO:0009055	GO:0004872	GO:0005488	GO:0007155	GO:0007160	GO:0007229	GO:0008305	GO:0005576	GO:0006952	GO:0005515	GO:0005199	GO:0009277	GO:0051536	GO:0005525	GO:0005874	GO:0007017	GO:0008152	GO:0016747
2.0_INSECT_GG3J73P03F6DA2	GO:0009055	GO:0051536	GO:0004872	GO:0005488	GO:0007155	GO:0007160	GO:0007229	GO:0008305	GO:0005576	GO:0005515	GO:0005525	GO:0005874	GO:0007017	GO:0008152	GO:0016747
2.0_INSECT_GG3J73P03F6E90	GO:0005515	GO:0008152	GO:0016747	GO:0009055	GO:0004872	GO:0005488	GO:0007155	GO:0007160	GO:0007229	GO:0008305	GO:0005576	GO:0006952	GO:0005525	GO:0005874	GO:0007017	GO:0051536
2.0_INSECT_GG3J73P03F6EBB	GO:0008152	GO:0016747	GO:0005576	GO:0005515	GO:0005525	GO:0005874	GO:0007017	GO:0009055	GO:0004872	GO:0005488	GO:0007155	GO:0007160	GO:0007229	GO:0008305	GO:0006952	GO:0051536
2.0_INSECT_GG3J73P03F6EBN	GO:0008152	GO:0016747	GO:0009055	GO:0005576	GO:0006952	GO:0005515	GO:0051536	GO:0004872	GO:0005488	GO:0007155	GO:0007160	GO:0007229	GO:0008305	GO:0009755	GO:0005525	GO:0005874	GO:0007017
2.0_INSECT_GG3J73P03F6EJY	GO:0009055	GO:0004872	GO:0005488	GO:0007155	GO:0007160	GO:0007229	GO:0008305	GO:0005515	GO:0008152	GO:0016747	GO:0005525	GO:0005874	GO:0007017	GO:0005576	GO:0006952	GO:0001558	GO:0005520	GO:0051536
2.0_INSECT_GG3J73P03F6FZ3	GO:0009055	GO:0005576	GO:0005515	GO:0051536	GO:0008152	GO:0016747	GO:0006952	GO:0005525	GO:0005874	GO:0007017	GO:0004872	GO:0005488	GO:0007155	GO:0007160	GO:0007229	GO:0008305
2.0_INSECT_GG3J73P03F6FZH	GO:0009055	GO:0008152	GO:0016747	GO:0005525	GO:0005874	GO:0007017	GO:0005576	GO:0006952	GO:0005515	GO:0051536	GO:0004872	GO:0005488	GO:0007155	GO:0007160	GO:0007229	GO:0008305
2.0_INSECT_GG3J73P03F6GQ0	GO:0009055	GO:0051536	GO:0004872	GO:0005488	GO:0007155	GO:0007160	GO:0007229	GO:0008305	GO:0005515	GO:0005576
2.0_INSECT_GG3J73P03F6GR7	GO:0009055	GO:0051536	GO:0005576	GO:0006952
2.0_INSECT_GG3J73P03F6HDK	GO:0009055	GO:0005515	GO:0042309	GO:0050825	GO:0050826	GO:0005525	GO:0005874	GO:0007017	GO:0051536	GO:0008152	GO:0016747	GO:0004872	GO:0005488	GO:0007155	GO:0007160	GO:0007229	GO:0008305	GO:0005576	GO:0046872	GO:0006952
2.0_INSECT_GG3J73P03F6HIY	GO:0005525	GO:0005874	GO:0007017	GO:0009055	GO:0051536	GO:0005515	GO:0008152	GO:0016747	GO:0005576
2.0_INSECT_GG3J73P03F6I11	GO:0009055	GO:0005515
2.0_INSECT_GG3J73P03F6I4M	GO:0005515	GO:0009055	GO:0051536	GO:0005576	GO:0008152	GO:0016747	GO:0006952	GO:0004872	GO:0005488	GO:0007155	GO:0007160	GO:0007229	GO:0008305	GO:0016068
2.0_INSECT_GG3J73P03F6J1B	GO:0005576	GO:0009055
2.0_INSECT_GG3J73P03F6JJA	GO:0005576	GO:0005515	GO:0009055	GO:0008152	GO:0016747	GO:0005525	GO:0005874	GO:0007017
2.0_INSECT_GG3J73P03F6LB3	GO:0009055	GO:0004872	GO:0005488	GO:0007155	GO:0007160	GO:0007229	GO:0008305	GO:0005576	GO:0006952	GO:0005515
2.0_INSECT_GG3J73P03F6LHT	GO:0008152	GO:0016747	GO:0009055	GO:0005576	GO:0005515	GO:0051536	GO:0006952	GO:0005525	GO:0005874	GO:0007017	GO:0004872	GO:0005488	GO:0007155	GO:0007160	GO:0007229	GO:0008305
2.0_INSECT_GG3J73P03F6MGS	GO:0009055
2.0_INSECT_GG3J73P03F6NBL	GO:0005515
2.0_INSECT_GG3J73P03F6NR9	GO:0008152	GO:0016747	GO:0009055	GO:0051536	GO:0005515
2.0_INSECT_GG3J73P03F6NX1	GO:0008152	GO:0016747	GO:0009055	GO:0051536	GO:0005515	GO:0005576	GO:0006952	GO:0004872	GO:0005488	GO:0007155	GO:0007160	GO:0007229	GO:0008305	GO:0001558	GO:0005520	GO:0005525	GO:0005874	GO:0007017	GO:0009755
2.0_INSECT_GG3J73P03F6OLV	GO:0008152	GO:0016747	GO:0009055	GO:0051536	GO:0004872	GO:0005488	GO:0007155	GO:0007160	GO:0007229	GO:0008305	GO:0005576	GO:0005515	GO:0009755	GO:0006952	GO:0005525	GO:0005874	GO:0007017
2.0_INSECT_GG3J73P03F6OQ8	GO:0009055	GO:0051536	GO:0005515	GO:0005576
2.0_INSECT_GG3J73P03F6P2U	GO:0016068	GO:0009055	GO:0005515	GO:0005576	GO:0008152	GO:0016747	GO:0004872	GO:0005488	GO:0007155	GO:0007160	GO:0007229	GO:0008305	GO:0051536	GO:0005525	GO:0005874	GO:0007017	GO:0006952	GO:0009755
2.0_INSECT_GG3J73P03F6Q3Z	GO:0008152	GO:0016747
2.0_INSECT_GG3J73P03F6QGM	GO:0008152	GO:0016747	GO:0009055	GO:0005515
2.0_INSECT_GG3J73P03F6QSJ	GO:0008152	GO:0016747	GO:0009055	GO:0005576	GO:0051536
2.0_INSECT_GG3J73P03F6QSQ	GO:0009055	GO:0005515	GO:0008152	GO:0016747	GO:0005525	GO:0005874	GO:0007017	GO:0004872	GO:0005488	GO:0007155	GO:0007160	GO:0007229	GO:0008305	GO:0005576	GO:0006952	GO:0016068	GO:0051536	GO:0046872
2.0_INSECT_GG3J73P03F6R9L	GO:0009055	GO:0005576
2.0_INSECT_GG3J73P03F6RD7	GO:0008152	GO:0016747	GO:0009055	GO:0005576	GO:0005515	GO:0051536	GO:0006952	GO:0016068	GO:0009755	GO:0042309	GO:0050825	GO:0050826	GO:0004872	GO:0005488	GO:0007155	GO:0007160	GO:0007229	GO:0008305
2.0_INSECT_GG3J73P03F6RR2	GO:0005515	GO:0009055	GO:0051536	GO:0005576	GO:0006952	GO:0005525	GO:0005874	GO:0007017
2.0_INSECT_GG3J73P03F6S7R	GO:0005515	GO:0009055	GO:0005576	GO:0008152	GO:0016747	GO:0005525	GO:0005874	GO:0007017	GO:0051536	GO:0004872	GO:0005488	GO:0007155	GO:0007160	GO:0007229	GO:0008305	GO:0004252	GO:0006508	GO:0006952	GO:0016068
2.0_INSECT_GG3J73P03F6SOS	GO:0009055	GO:0005576
2.0_INSECT_GG3J73P03F6TB4	GO:0008152	GO:0016747	GO:0009055	GO:0005515	GO:0005576	GO:0051536	GO:0005525	GO:0005874	GO:0007017	GO:0006952	GO:0004872	GO:0005488	GO:0007155	GO:0007160	GO:0007229	GO:0008305
2.0_INSECT_GG3J73P03F6TG3	GO:0005515	GO:0009055	GO:0005576	GO:0006952	GO:0004872	GO:0005488	GO:0007155	GO:0007160	GO:0007229	GO:0008305	GO:0051536	GO:0008152	GO:0016747	GO:0005525	GO:0005874	GO:0007017
2.0_INSECT_GG3J73P03F6TI4	GO:0009055	GO:0008152	GO:0016747	GO:0005576	GO:0005515	GO:0004872	GO:0005488	GO:0007155	GO:0007160	GO:0007229	GO:0008305
2.0_INSECT_GG3J73P03F6U04	GO:0005576	GO:0005515	GO:0009055	GO:0006952
2.0_INSECT_GG3J73P03F6UVY	GO:0008152	GO:0016747	GO:0005515	GO:0009055	GO:0004872	GO:0005488	GO:0007155	GO:0007160	GO:0007229	GO:0008305	GO:0005576	GO:0051536	GO:0005525	GO:0005874	GO:0007017
2.0_INSECT_GG3J73P03F6V06	GO:0009055
2.0_INSECT_GG3J73P03F6VEH	GO:0009055	GO:0005515
2.0_INSECT_GG3J73P03F6VPM	GO:0009055	GO:0005576	GO:0006952	GO:0005515	GO:0008152	GO:0016747	GO:0004872	GO:0005488	GO:0007155	GO:0007160	GO:0007229	GO:0008305	GO:0016068	GO:0051536	GO:0009755	GO:0005525	GO:0005874	GO:0007017
2.0_INSECT_GG3J73P03F6W7I	GO:0004872	GO:0005488	GO:0007155	GO:0007160	GO:0007229	GO:0008305	GO:0005576	GO:0006952	GO:0005515	GO:0009055	GO:0008152	GO:0016747	GO:0051536	GO:0005525	GO:0005874	GO:0007017
2.0_INSECT_GG3J73P03F6YAB	GO:0009055	GO:0051536	GO:0005525	GO:0005874	GO:0007017	GO:0005515	GO:0005576	GO:0004872	GO:0005488	GO:0007155	GO:0007160	GO:0007229	GO:0008305
2.0_INSECT_GG3J73P03F6YQB	GO:0008152	GO:0016747	GO:0009055	GO:0005199	GO:0009277	GO:0005576	GO:0005515	GO:0051536	GO:0004872	GO:0005488	GO:0007155	GO:0007160	GO:0007229	GO:0008305
2.0_INSECT_GG3J73P03F6YYJ	GO:0008152	GO:0016747	GO:0009055	GO:0051536	GO:0005576	GO:0005515	GO:0005525	GO:0005874	GO:0007017	GO:0006952	GO:0004872	GO:0005488	GO:0007155	GO:0007160	GO:0007229	GO:0008305	GO:0046872
2.0_INSECT_GG3J73P03F6ZL5	GO:0009055	GO:0051536	GO:0005515	GO:0005576	GO:0008152	GO:0016747
2.0_INSECT_GG3J73P03F6ZPB	GO:0005515	GO:0009055	GO:0005576	GO:0051536	GO:0008152	GO:0016747	GO:0004872	GO:0005488	GO:0007155	GO:0007160	GO:0007229	GO:0008305	GO:0006952	GO:0005525	GO:0005874	GO:0007017	GO:0046872
2.0_INSECT_GG3J73P03F6ZXN	GO:0008152	GO:0016747	GO:0009055	GO:0005576	GO:0006952	GO:0005515	GO:0051536	GO:0042309	GO:0050825	GO:0050826	GO:0005525	GO:0005874	GO:0007017	GO:0046872	GO:0004872	GO:0005488	GO:0007155	GO:0007160	GO:0007229	GO:0008305
2.0_INSECT_GG3J73P03F70EV	GO:0009055	GO:0051536	GO:0005515	GO:0005576	GO:0006952	GO:0008152	GO:0016747	GO:0004872	GO:0005488	GO:0007155	GO:0007160	GO:0007229	GO:0008305
2.0_INSECT_GG3J73P03F70QI	GO:0009055	GO:0005576	GO:0006952	GO:0005515
2.0_INSECT_GG3J73P03F71XO	GO:0005515	GO:0008152	GO:0016747	GO:0009055
2.0_INSECT_GG3J73P03F72NQ	GO:0009055	GO:0005515	GO:0008152	GO:0016747	GO:0005576	GO:0051536	GO:0005525	GO:0005874	GO:0007017	GO:0006952
2.0_INSECT_GG3J73P03F72RJ	GO:0008152	GO:0016747	GO:0009055	GO:0005515	GO:0005199	GO:0009277	GO:0051536	GO:0005576	GO:0006952	GO:0005525	GO:0005874	GO:0007017	GO:0004872	GO:0005488	GO:0007155	GO:0007160	GO:0007229	GO:0008305
2.0_INSECT_GG3J73P03F73VQ	GO:0009055
2.0_INSECT_GG3J73P03F73ZW	GO:0008152	GO:0016747	GO:0009055	GO:0005576	GO:0005515	GO:0051536	GO:0006952	GO:0009755
2.0_INSECT_GG3J73P03F7536	GO:0009055	GO:0005515	GO:0008152	GO:0016747	GO:0051536	GO:0005576	GO:0004872	GO:0005488	GO:0007155	GO:0007160	GO:0007229	GO:0008305	GO:0005525	GO:0005874	GO:0007017	GO:0006952
2.0_INSECT_GG3J73P03F759Y	GO:0009055	GO:0051536	GO:0005515	GO:0005576	GO:0008152	GO:0016747	GO:0004872	GO:0005488	GO:0007155	GO:0007160	GO:0007229	GO:0008305	GO:0006952
2.0_INSECT_GG3J73P03F75ZC	GO:0009055	GO:0005576	GO:0005515	GO:0051536	GO:0006952	GO:0008152	GO:0016747	GO:0004872	GO:0005488	GO:0007155	GO:0007160	GO:0007229	GO:0008305	GO:0005525	GO:0005874	GO:0007017
2.0_INSECT_GG3J73P03F76BR	GO:0009055	GO:0051536	GO:0005515
2.0_INSECT_GG3J73P03F76HS	GO:0009055
2.0_INSECT_GG3J73P03F76NQ	GO:0005199	GO:0009277	GO:0005515	GO:0009055	GO:0004872	GO:0005488	GO:0007155	GO:0007160	GO:0007229	GO:0008305	GO:0005576	GO:0008152	GO:0016747	GO:0006952	GO:0051536	GO:0046872	GO:0005525	GO:0005874	GO:0007017
2.0_INSECT_GG3J73P03F76Q4	GO:0009055	GO:0051536	GO:0005576	GO:0005515	GO:0008152	GO:0016747
2.0_INSECT_GG3J73P03F76T3	GO:0008152	GO:0016747	GO:0009055	GO:0005515	GO:0005576	GO:0051536	GO:0005525	GO:0005874	GO:0007017	GO:0004872	GO:0005488	GO:0007155	GO:0007160	GO:0007229	GO:0008305
2.0_INSECT_GG3J73P03F77IJ	GO:0009055	GO:0005576	GO:0005515	GO:0005199	GO:0009277
2.0_INSECT_GG3J73P03F77XK	GO:0009055	GO:0005576	GO:0005515	GO:0051536	GO:0008152	GO:0016747	GO:0009755
2.0_INSECT_GG3J73P03F78K4	GO:0009055
2.0_INSECT_GG3J73P03F78XI	GO:0009055	GO:0005515	GO:0005199	GO:0009277	GO:0046872	GO:0005576	GO:0005525	GO:0005874	GO:0007017	GO:0004872	GO:0005488	GO:0007155	GO:0007160	GO:0007229	GO:0008305	GO:0008152	GO:0016747
2.0_INSECT_GG3J73P03F7927	GO:0009055	GO:0005576	GO:0005515	GO:0006952	GO:0051536	GO:0008152	GO:0016747	GO:0046872	GO:0005525	GO:0005874	GO:0007017
2.0_INSECT_GG3J73P03F794K	GO:0005576	GO:0005515
2.0_INSECT_GG3J73P03F7ACJ	GO:0009055	GO:0051536	GO:0005576	GO:0005515
2.0_INSECT_GG3J73P03F7AN9	GO:0009055	GO:0051536	GO:0005576	GO:0006952	GO:0005515	GO:0008152	GO:0016747	GO:0005525	GO:0005874	GO:0007017	GO:0046872	GO:0004872	GO:0005488	GO:0007155	GO:0007160	GO:0007229	GO:0008305
2.0_INSECT_GG3J73P03F7B06	GO:0009055	GO:0005515	GO:0008152	GO:0016747	GO:0005576	GO:0006952	GO:0004872	GO:0005488	GO:0007155	GO:0007160	GO:0007229	GO:0008305	GO:0051536	GO:0005525	GO:0005874	GO:0007017	GO:0016068
2.0_INSECT_GG3J73P03F7BA7	GO:0009055	GO:0004872	GO:0005488	GO:0007155	GO:0007160	GO:0007229	GO:0008305	GO:0005515	GO:0008152	GO:0016747	GO:0005525	GO:0005874	GO:0007017	GO:0005576	GO:0051536	GO:0006952
2.0_INSECT_GG3J73P03F7BGR	GO:0008152	GO:0016747	GO:0009055	GO:0051536	GO:0005576	GO:0005515	GO:0006952
2.0_INSECT_GG3J73P03F7BYG	GO:0008152	GO:0016747	GO:0009055	GO:0005515	GO:0005525	GO:0005874	GO:0007017	GO:0004872	GO:0005488	GO:0007155	GO:0007160	GO:0007229	GO:0008305	GO:0016068	GO:0051536	GO:0005576	GO:0006952
2.0_INSECT_GG3J73P03F7D71	GO:0009055	GO:0051536	GO:0005525	GO:0005874	GO:0007017	GO:0005576	GO:0005515	GO:0008152	GO:0016747	GO:0006952	GO:0004872	GO:0005488	GO:0007155	GO:0007160	GO:0007229	GO:0008305	GO:0046872	GO:0016068
2.0_INSECT_GG3J73P03F7DH6	GO:0008152	GO:0016747	GO:0009055	GO:0051536	GO:0005515	GO:0005576	GO:0046872	GO:0005525	GO:0005874	GO:0007017	GO:0004872	GO:0005488	GO:0007155	GO:0007160	GO:0007229	GO:0008305	GO:0005199	GO:0009277
2.0_INSECT_GG3J73P03F7DIY	GO:0008152	GO:0016747	GO:0009055	GO:0004872	GO:0005488	GO:0007155	GO:0007160	GO:0007229	GO:0008305	GO:0005576	GO:0005515	GO:0051536	GO:0001558	GO:0005520	GO:0005525	GO:0005874	GO:0007017	GO:0006952
2.0_INSECT_GG3J73P03F7DO0	GO:0005576	GO:0009755	GO:0009055	GO:0051536	GO:0006952	GO:0005515	GO:0008152	GO:0016747	GO:0005525	GO:0005874	GO:0007017	GO:0004872	GO:0005488	GO:0007155	GO:0007160	GO:0007229	GO:0008305
2.0_INSECT_GG3J73P03F7E2J	GO:0009055	GO:0005576	GO:0051536	GO:0005515	GO:0008152	GO:0016747	GO:0006952	GO:0005525	GO:0005874	GO:0007017	GO:0046872	GO:0004872	GO:0005488	GO:0007155	GO:0007160	GO:0007229	GO:0008305	GO:0001558	GO:0005520
2.0_INSECT_GG3J73P03F7ECZ	GO:0009055	GO:0051536	GO:0005515	GO:0005576	GO:0008152	GO:0016747	GO:0004872	GO:0005488	GO:0007155	GO:0007160	GO:0007229	GO:0008305	GO:0005525	GO:0005874	GO:0007017	GO:0006952
2.0_INSECT_GG3J73P03F7IHH	GO:0008152	GO:0016747	GO:0009055	GO:0051536	GO:0005576	GO:0005515
2.0_INSECT_GG3J73P03F7J5E	GO:0005515	GO:0009055	GO:0005576	GO:0006952	GO:0008152	GO:0016747
2.0_INSECT_GG3J73P03F7JBU	GO:0009055	GO:0005576
2.0_INSECT_GG3J73P03F7JD3	GO:0009055	GO:0051536	GO:0008152	GO:0016747	GO:0005576	GO:0006952	GO:0005515	GO:0004872	GO:0005488	GO:0007155	GO:0007160	GO:0007229	GO:0008305	GO:0005525	GO:0005874	GO:0007017
2.0_INSECT_GG3J73P03F7JMA	GO:0009055	GO:0051536	GO:0005576	GO:0005515
2.0_INSECT_GG3J73P03F7JQ3	GO:0009055	GO:0008152	GO:0016747	GO:0005576	GO:0006952	GO:0004872	GO:0005488	GO:0007155	GO:0007160	GO:0007229	GO:0008305	GO:0005515	GO:0051536
2.0_INSECT_GG3J73P03F7K4B	GO:0008152	GO:0016747	GO:0009055	GO:0051536	GO:0005576	GO:0005515	GO:0006952	GO:0005525	GO:0005874	GO:0007017
2.0_INSECT_GG3J73P03F7KEG	GO:0008152	GO:0016747	GO:0009055
2.0_INSECT_GG3J73P03F7KMQ	GO:0008152	GO:0016747	GO:0009055	GO:0005515	GO:0005525	GO:0005874	GO:0007017	GO:0005576	GO:0004872	GO:0005488	GO:0007155	GO:0007160	GO:0007229	GO:0008305	GO:0051536
2.0_INSECT_GG3J73P03F7KT3	GO:0009055	GO:0051536	GO:0005515	GO:0005576	GO:0004872	GO:0005488	GO:0007155	GO:0007160	GO:0007229	GO:0008305	GO:0006952	GO:0008152	GO:0016747	GO:0009755
2.0_INSECT_GG3J73P03F7LBD	GO:0009055	GO:0005576	GO:0008152	GO:0016747
2.0_INSECT_GG3J73P03F7LT7	GO:0009055	GO:0005576	GO:0005515	GO:0051536	GO:0005525	GO:0005874	GO:0007017	GO:0004872	GO:0005488	GO:0007155	GO:0007160	GO:0007229	GO:0008305	GO:0008152	GO:0016747	GO:0006952
2.0_INSECT_GG3J73P03F7MF4	GO:0009055	GO:0051536	GO:0005576	GO:0008152	GO:0016747	GO:0005515	GO:0005525	GO:0005874	GO:0007017	GO:0004872	GO:0005488	GO:0007155	GO:0007160	GO:0007229	GO:0008305	GO:0006952
2.0_INSECT_GG3J73P03F7MU0	GO:0009055	GO:0051536	GO:0005515	GO:0005576
2.0_INSECT_GG3J73P03F7N1K	GO:0009055	GO:0005515	GO:0005576	GO:0008152	GO:0016747	GO:0005525	GO:0005874	GO:0007017	GO:0051536	GO:0006952	GO:0046872	GO:0004872	GO:0005488	GO:0007155	GO:0007160	GO:0007229	GO:0008305
2.0_INSECT_GG3J73P03F7N2E	GO:0009055	GO:0005515	GO:0008152	GO:0016747	GO:0005576	GO:0051536	GO:0009755	GO:0006952	GO:0004872	GO:0005488	GO:0007155	GO:0007160	GO:0007229	GO:0008305
2.0_INSECT_GG3J73P03F7N9Q	GO:0008152	GO:0016747	GO:0005576	GO:0005515	GO:0009055	GO:0006952	GO:0004872	GO:0005488	GO:0007155	GO:0007160	GO:0007229	GO:0008305	GO:0051536	GO:0005525	GO:0005874	GO:0007017
2.0_INSECT_GG3J73P03F7OBP	GO:0005576	GO:0005515	GO:0009055	GO:0051536	GO:0004872	GO:0005488	GO:0007155	GO:0007160	GO:0007229	GO:0008305	GO:0006952	GO:0008152	GO:0016747	GO:0005525	GO:0005874	GO:0007017
2.0_INSECT_GG3J73P03F7OFW	GO:0004252	GO:0006508	GO:0009055	GO:0005576	GO:0005515	GO:0051536	GO:0008152	GO:0016747	GO:0006952	GO:0009755	GO:0005525	GO:0005874	GO:0007017
2.0_INSECT_GG3J73P03F7OI9	GO:0009055	GO:0005515	GO:0005576	GO:0008152	GO:0016747	GO:0005525	GO:0005874	GO:0007017	GO:0004872	GO:0005488	GO:0007155	GO:0007160	GO:0007229	GO:0008305	GO:0051536
2.0_INSECT_GG3J73P03F7OO8	GO:0009055	GO:0051536	GO:0005576	GO:0006952	GO:0005515	GO:0008152	GO:0016747
2.0_INSECT_GG3J73P03F7OOX	GO:0009055	GO:0005576	GO:0005515	GO:0006952	GO:0016068	GO:0008152	GO:0016747	GO:0051536	GO:0004872	GO:0005488	GO:0007155	GO:0007160	GO:0007229	GO:0008305	GO:0046872	GO:0042309	GO:0050825	GO:0050826
2.0_INSECT_GG3J73P03F7OPW	GO:0009055	GO:0005515	GO:0008152	GO:0016747	GO:0005525	GO:0005874	GO:0007017	GO:0005576	GO:0004872	GO:0005488	GO:0007155	GO:0007160	GO:0007229	GO:0008305	GO:0051536	GO:0006952	GO:0016068
2.0_INSECT_GG3J73P03F7Q3L	GO:0009055	GO:0005515
2.0_INSECT_GG3J73P03F7Q63	GO:0008152	GO:0016747	GO:0009055	GO:0004872	GO:0005488	GO:0007155	GO:0007160	GO:0007229	GO:0008305	GO:0005576	GO:0005515
2.0_INSECT_GG3J73P03F7QJK	GO:0005576	GO:0009055	GO:0004872	GO:0005488	GO:0007155	GO:0007160	GO:0007229	GO:0008305	GO:0005515	GO:0008152	GO:0016747	GO:0051536	GO:0006952
2.0_INSECT_GG3J73P03F7QT5	GO:0009055	GO:0004872	GO:0005488	GO:0007155	GO:0007160	GO:0007229	GO:0008305	GO:0005515	GO:0005576	GO:0051536	GO:0006952	GO:0005525	GO:0005874	GO:0007017	GO:0008152	GO:0016747
2.0_INSECT_GG3J73P03F7R4O	GO:0008152	GO:0016747
2.0_INSECT_GG3J73P03F7RH8	GO:0008152	GO:0016747	GO:0005515	GO:0009055	GO:0005576	GO:0016068	GO:0051536	GO:0004872	GO:0005488	GO:0007155	GO:0007160	GO:0007229	GO:0008305	GO:0006952
2.0_INSECT_GG3J73P03F7RNQ	GO:0008152	GO:0016747	GO:0009055	GO:0004872	GO:0005488	GO:0007155	GO:0007160	GO:0007229	GO:0008305	GO:0005515	GO:0005576
2.0_INSECT_GG3J73P03F7RVX	GO:0009055	GO:0005576	GO:0005515
2.0_INSECT_GG3J73P03F7S33	GO:0008152	GO:0016747	GO:0009055	GO:0005576	GO:0006952	GO:0005515	GO:0005525	GO:0005874	GO:0007017	GO:0051536	GO:0004872	GO:0005488	GO:0007155	GO:0007160	GO:0007229	GO:0008305
2.0_INSECT_GG3J73P03F7SWI	GO:0008152	GO:0016747	GO:0009055
2.0_INSECT_GG3J73P03F7U5D	GO:0009055	GO:0008152	GO:0016747	GO:0005515	GO:0005576	GO:0004872	GO:0005488	GO:0007155	GO:0007160	GO:0007229	GO:0008305	GO:0051536	GO:0005525	GO:0005874	GO:0007017	GO:0042309	GO:0050825	GO:0050826	GO:0006952
2.0_INSECT_GG3J73P03F7U7A	GO:0009055	GO:0005576	GO:0006952	GO:0005515	GO:0051536	GO:0004872	GO:0005488	GO:0007155	GO:0007160	GO:0007229	GO:0008305	GO:0008152	GO:0016747	GO:0016068
2.0_INSECT_GG3J73P03F7UA9	GO:0009055
2.0_INSECT_GG3J73P03F7V1H	GO:0009055	GO:0005515
2.0_INSECT_GG3J73P03F7V7W	GO:0008152	GO:0016747	GO:0009055	GO:0005576	GO:0006952	GO:0005515	GO:0005199	GO:0009277	GO:0051536	GO:0004872	GO:0005488	GO:0007155	GO:0007160	GO:0007229	GO:0008305
2.0_INSECT_GG3J73P03F7VJ0	GO:0009055	GO:0005515
2.0_INSECT_GG3J73P03F7VNT	GO:0009055	GO:0051536	GO:0004872	GO:0005488	GO:0007155	GO:0007160	GO:0007229	GO:0008305	GO:0005576	GO:0005515	GO:0046872
2.0_INSECT_GG3J73P03F7W9O	GO:0009055	GO:0004872	GO:0005488	GO:0007155	GO:0007160	GO:0007229	GO:0008305	GO:0005515	GO:0008152	GO:0016747	GO:0005576	GO:0051536	GO:0006952	GO:0005525	GO:0005874	GO:0007017
2.0_INSECT_GG3J73P03F7WFM	GO:0016068	GO:0009055	GO:0051536
2.0_INSECT_GG3J73P03F7WG3	GO:0005576	GO:0005515	GO:0009055	GO:0051536	GO:0006952	GO:0008152	GO:0016747	GO:0005525	GO:0005874	GO:0007017	GO:0004872	GO:0005488	GO:0007155	GO:0007160	GO:0007229	GO:0008305
2.0_INSECT_GG3J73P03F7WKT	GO:0005515	GO:0009055	GO:0005576	GO:0004872	GO:0005488	GO:0007155	GO:0007160	GO:0007229	GO:0008305	GO:0006952	GO:0005525	GO:0005874	GO:0007017	GO:0046872	GO:0051536	GO:0008152	GO:0016747
2.0_INSECT_GG3J73P03F7WZF	GO:0009055	GO:0005515	GO:0004872	GO:0005488	GO:0007155	GO:0007160	GO:0007229	GO:0008305	GO:0005576	GO:0008152	GO:0016747	GO:0005525	GO:0005874	GO:0007017	GO:0051536	GO:0006952
2.0_INSECT_GG3J73P03F7YEI	GO:0008152	GO:0016747	GO:0005576	GO:0009055	GO:0005515	GO:0006952
2.0_INSECT_GG3J73P03F7YIL	GO:0008152	GO:0016747	GO:0009055	GO:0004872	GO:0005488	GO:0007155	GO:0007160	GO:0007229	GO:0008305	GO:0005576	GO:0005515	GO:0051536	GO:0005525	GO:0005874	GO:0007017	GO:0009755	GO:0003735	GO:0005622	GO:0005840	GO:0006412
2.0_INSECT_GG3J73P03F7Z3O	GO:0005576	GO:0006952	GO:0009055	GO:0005525	GO:0005874	GO:0007017	GO:0005515	GO:0051536	GO:0008152	GO:0016747
2.0_INSECT_GG3J73P03F7Z90	GO:0009055	GO:0005515	GO:0008152	GO:0016747	GO:0051536	GO:0004872	GO:0005488	GO:0007155	GO:0007160	GO:0007229	GO:0008305	GO:0005576	GO:0005525	GO:0005874	GO:0007017
2.0_INSECT_GG3J73P03F802L	GO:0005515
2.0_INSECT_GG3J73P03F80PF	GO:0009055	GO:0005515	GO:0005576
2.0_INSECT_GG3J73P03F80ZA	GO:0008152	GO:0016747	GO:0009055	GO:0051536	GO:0005515	GO:0005576
2.0_INSECT_GG3J73P03F81H9	GO:0008152	GO:0016747	GO:0009055	GO:0005576	GO:0005515	GO:0005525	GO:0005874	GO:0007017
2.0_INSECT_GG3J73P03F8248	GO:0009055	GO:0008152	GO:0016747	GO:0005576	GO:0005515	GO:0051536	GO:0016068	GO:0004252	GO:0006508	GO:0005525	GO:0005874	GO:0007017
2.0_INSECT_GG3J73P03F82CU	GO:0005515	GO:0009055	GO:0051536	GO:0005525	GO:0005874	GO:0007017	GO:0005576
2.0_INSECT_GG3J73P03F82PC	GO:0008152	GO:0016747	GO:0009055	GO:0051536	GO:0005576	GO:0005515
2.0_INSECT_GG3J73P03F82W7	GO:0009055	GO:0005576
2.0_INSECT_GG3J73P03F83JM	GO:0008152	GO:0016747	GO:0004872	GO:0005488	GO:0007155	GO:0007160	GO:0007229	GO:0008305	GO:0005515
2.0_INSECT_GG3J73P03F840T	GO:0009055	GO:0005515
2.0_INSECT_GG3J73P03F842P	GO:0005515	GO:0009055	GO:0051536
2.0_INSECT_GG3J73P03F84ZT	GO:0009055	GO:0008152	GO:0016747	GO:0005515	GO:0005576	GO:0004872	GO:0005488	GO:0007155	GO:0007160	GO:0007229	GO:0008305	GO:0051536	GO:0006952
2.0_INSECT_GG3J73P03F86FF	GO:0005515
2.0_INSECT_GG3J73P03F86PN	GO:0005525	GO:0005874	GO:0007017	GO:0008152	GO:0016747	GO:0009055	GO:0005576	GO:0005515	GO:0006952	GO:0004872	GO:0005488	GO:0007155	GO:0007160	GO:0007229	GO:0008305	GO:0004252	GO:0006508	GO:0051536	GO:0009755
2.0_INSECT_GG3J73P03F86ZR	GO:0009055	GO:0051536	GO:0005576	GO:0006952	GO:0005515	GO:0008152	GO:0016747	GO:0005525	GO:0005874	GO:0007017	GO:0046872
2.0_INSECT_GG3J73P03F872F	GO:0009055	GO:0005576	GO:0051536	GO:0005515	GO:0004872	GO:0005488	GO:0007155	GO:0007160	GO:0007229	GO:0008305	GO:0006952	GO:0009755	GO:0008152	GO:0016747	GO:0005525	GO:0005874	GO:0007017
2.0_INSECT_GG3J73P03F87I5	GO:0008152	GO:0016747	GO:0009055	GO:0051536	GO:0005525	GO:0005874	GO:0007017	GO:0005576	GO:0004872	GO:0005488	GO:0007155	GO:0007160	GO:0007229	GO:0008305	GO:0005515	GO:0006952
2.0_INSECT_GG3J73P03F87OB	GO:0005515
2.0_INSECT_GG3J73P03F87S6	GO:0008152	GO:0016747	GO:0009055	GO:0004872	GO:0005488	GO:0007155	GO:0007160	GO:0007229	GO:0008305	GO:0005576	GO:0005515	GO:0051536	GO:0046872
2.0_INSECT_GG3J73P03F8835	GO:0005576
2.0_INSECT_GG3J73P03F88PJ	GO:0009055	GO:0005515	GO:0008152	GO:0016747	GO:0005576	GO:0006952
2.0_INSECT_GG3J73P03F88W2	GO:0008152	GO:0016747
2.0_INSECT_GG3J73P03F88YI	GO:0008152	GO:0016747	GO:0009055	GO:0005576
2.0_INSECT_GG3J73P03F892P	GO:0005515	GO:0005525	GO:0005874	GO:0007017	GO:0005576	GO:0008152	GO:0016747	GO:0009055	GO:0051536	GO:0006952	GO:0004872	GO:0005488	GO:0007155	GO:0007160	GO:0007229	GO:0008305	GO:0005199	GO:0009277
2.0_INSECT_GG3J73P03F897H	GO:0005515	GO:0009055	GO:0005576	GO:0008152	GO:0016747	GO:0005525	GO:0005874	GO:0007017	GO:0004872	GO:0005488	GO:0007155	GO:0007160	GO:0007229	GO:0008305
2.0_INSECT_GG3J73P03F89R1	GO:0005515	GO:0009055	GO:0005576	GO:0051536	GO:0008152	GO:0016747	GO:0005525	GO:0005874	GO:0007017	GO:0009405	GO:0004872	GO:0005488	GO:0007155	GO:0007160	GO:0007229	GO:0008305	GO:0005199	GO:0009277	GO:0006952
2.0_INSECT_GG3J73P03F89UV	GO:0008152	GO:0016747	GO:0005576	GO:0009055	GO:0005515	GO:0051536	GO:0004872	GO:0005488	GO:0007155	GO:0007160	GO:0007229	GO:0008305	GO:0006952	GO:0005199	GO:0009277	GO:0005525	GO:0005874	GO:0007017
2.0_INSECT_GG3J73P03F8ACB	GO:0009055	GO:0051536	GO:0005576	GO:0005515	GO:0009755	GO:0008152	GO:0016747	GO:0005199	GO:0009277	GO:0004872	GO:0005488	GO:0007155	GO:0007160	GO:0007229	GO:0008305	GO:0006952
2.0_INSECT_GG3J73P03F8BRF	GO:0008152	GO:0016747	GO:0009055	GO:0005525	GO:0005874	GO:0007017	GO:0005576	GO:0005515	GO:0004872	GO:0005488	GO:0007155	GO:0007160	GO:0007229	GO:0008305	GO:0051536	GO:0006952
2.0_INSECT_GG3J73P03F8CCJ	GO:0005525	GO:0005874	GO:0007017	GO:0005576	GO:0005515	GO:0008152	GO:0016747	GO:0009055	GO:0051536	GO:0016068	GO:0006952	GO:0004872	GO:0005488	GO:0007155	GO:0007160	GO:0007229	GO:0008305
2.0_INSECT_GG3J73P03F8CTT	GO:0009055
2.0_INSECT_GG3J73P03F8D33	GO:0009055	GO:0005515	GO:0005576	GO:0008152	GO:0016747	GO:0051536	GO:0005525	GO:0005874	GO:0007017
2.0_INSECT_GG3J73P03F8DBF	GO:0005576	GO:0005515	GO:0009055	GO:0051536	GO:0006952	GO:0008152	GO:0016747	GO:0004872	GO:0005488	GO:0007155	GO:0007160	GO:0007229	GO:0008305
2.0_INSECT_GG3J73P03F8DE0	GO:0008152	GO:0016747
2.0_INSECT_GG3J73P03F8EFR	GO:0005515	GO:0009055	GO:0005525	GO:0005874	GO:0007017	GO:0004872	GO:0005488	GO:0007155	GO:0007160	GO:0007229	GO:0008305	GO:0005576	GO:0006952	GO:0051536	GO:0009755	GO:0008152	GO:0016747
2.0_INSECT_GG3J73P03F8EH7	GO:0009055	GO:0051536	GO:0005515	GO:0008152	GO:0016747	GO:0005576	GO:0005525	GO:0005874	GO:0007017	GO:0004872	GO:0005488	GO:0007155	GO:0007160	GO:0007229	GO:0008305	GO:0006952
2.0_INSECT_GG3J73P03F8EVF	GO:0009055
2.0_INSECT_GG3J73P03F8EYC	GO:0009055	GO:0051536	GO:0005576	GO:0005515
2.0_INSECT_GG3J73P03F8G32	GO:0008152	GO:0016747	GO:0009055	GO:0005515	GO:0005525	GO:0005874	GO:0007017	GO:0005576	GO:0051536	GO:0006952	GO:0004872	GO:0005488	GO:0007155	GO:0007160	GO:0007229	GO:0008305
2.0_INSECT_GG3J73P03F8GVW	GO:0009055	GO:0051536	GO:0005576	GO:0005515	GO:0004872	GO:0005488	GO:0007155	GO:0007160	GO:0007229	GO:0008305	GO:0005525	GO:0005874	GO:0007017	GO:0008152	GO:0016747	GO:0005199	GO:0009277	GO:0006952
2.0_INSECT_GG3J73P03F8GWQ	GO:0005576	GO:0009055	GO:0005515
2.0_INSECT_GG3J73P03F8H2N	GO:0009055
2.0_INSECT_GG3J73P03F8HAW	GO:0005576	GO:0005515
2.0_INSECT_GG3J73P03F8I2Z	GO:0008152	GO:0016747	GO:0009055
2.0_INSECT_GG3J73P03F8IC9	GO:0009055	GO:0004872	GO:0005488	GO:0007155	GO:0007160	GO:0007229	GO:0008305	GO:0005515
2.0_INSECT_GG3J73P03F8J19	GO:0005515	GO:0009055	GO:0005576	GO:0008152	GO:0016747	GO:0004872	GO:0005488	GO:0007155	GO:0007160	GO:0007229	GO:0008305	GO:0006952	GO:0051536	GO:0005525	GO:0005874	GO:0007017	GO:0005199	GO:0009277	GO:0016068	GO:0046872
2.0_INSECT_GG3J73P03F8J6M	GO:0009055	GO:0005515
2.0_INSECT_GG3J73P03F8KQX	GO:0005576	GO:0009055	GO:0006952	GO:0005515	GO:0008152	GO:0016747	GO:0051536	GO:0004872	GO:0005488	GO:0007155	GO:0007160	GO:0007229	GO:0008305
2.0_INSECT_GG3J73P03F8L92	GO:0016068	GO:0008152	GO:0016747	GO:0009055	GO:0005515
2.0_INSECT_GG3J73P03F8LTX	GO:0009055	GO:0005576	GO:0006952	GO:0005515	GO:0005525	GO:0005874	GO:0007017	GO:0051536	GO:0008152	GO:0016747	GO:0004872	GO:0005488	GO:0007155	GO:0007160	GO:0007229	GO:0008305
2.0_INSECT_GG3J73P03F8M55	GO:0005576	GO:0005515	GO:0008152	GO:0016747	GO:0016068	GO:0009055	GO:0051536	GO:0005525	GO:0005874	GO:0007017	GO:0006952	GO:0005199	GO:0009277	GO:0004872	GO:0005488	GO:0007155	GO:0007160	GO:0007229	GO:0008305
2.0_INSECT_GG3J73P03F8NZW	GO:0009055	GO:0051536	GO:0005576	GO:0005515	GO:0006952	GO:0008152	GO:0016747	GO:0004872	GO:0005488	GO:0007155	GO:0007160	GO:0007229	GO:0008305	GO:0016068
2.0_INSECT_GG3J73P03F8O4Z	GO:0009055	GO:0051536	GO:0046872	GO:0008152	GO:0016747
2.0_INSECT_GG3J73P03F8OEN	GO:0004872	GO:0005488	GO:0007155	GO:0007160	GO:0007229	GO:0008305
2.0_INSECT_GG3J73P03F8OK6	GO:0005515	GO:0009055	GO:0051536	GO:0005576	GO:0008152	GO:0016747	GO:0004872	GO:0005488	GO:0007155	GO:0007160	GO:0007229	GO:0008305	GO:0006952
2.0_INSECT_GG3J73P03F8OLX	GO:0009055	GO:0005576	GO:0005515	GO:0008152	GO:0016747	GO:0051536	GO:0046872	GO:0006952	GO:0005525	GO:0005874	GO:0007017
2.0_INSECT_GG3J73P03F8P23	GO:0009055	GO:0004872	GO:0005488	GO:0007155	GO:0007160	GO:0007229	GO:0008305	GO:0005515	GO:0008152	GO:0016747	GO:0005525	GO:0005874	GO:0007017	GO:0005576	GO:0051536	GO:0006952
2.0_INSECT_GG3J73P03F8P6Y	GO:0009055	GO:0005515
2.0_INSECT_GG3J73P03F8PCZ	GO:0008152	GO:0016747	GO:0009055
2.0_INSECT_GG3J73P03F8PF3	GO:0009055	GO:0005525	GO:0005874	GO:0007017	GO:0005576
2.0_INSECT_GG3J73P03F8PKO	GO:0005515	GO:0008152	GO:0016747	GO:0009055	GO:0005576	GO:0009755	GO:0051536	GO:0004872	GO:0005488	GO:0007155	GO:0007160	GO:0007229	GO:0008305	GO:0006952	GO:0005525	GO:0005874	GO:0007017	GO:0005199	GO:0009277	GO:0046872
2.0_INSECT_GG3J73P03F8PQK	GO:0009055	GO:0051536	GO:0005576	GO:0008152	GO:0016747	GO:0016068
2.0_INSECT_GG3J73P03F8PRI	GO:0008152	GO:0016747	GO:0009055	GO:0051536	GO:0005576	GO:0005515
2.0_INSECT_GG3J73P03F8QAG	GO:0009055	GO:0005576	GO:0005525	GO:0005874	GO:0007017	GO:0005515
2.0_INSECT_GG3J73P03F8QE5	GO:0005515	GO:0009055	GO:0005576	GO:0008152	GO:0016747	GO:0051536	GO:0006952	GO:0004872	GO:0005488	GO:0007155	GO:0007160	GO:0007229	GO:0008305	GO:0005525	GO:0005874	GO:0007017
2.0_INSECT_GG3J73P03F8QQ3	GO:0009055	GO:0005515	GO:0008152	GO:0016747	GO:0005576	GO:0051536	GO:0046872
2.0_INSECT_GG3J73P03F8QQL	GO:0008152	GO:0016747	GO:0009055	GO:0051536	GO:0004872	GO:0005488	GO:0007155	GO:0007160	GO:0007229	GO:0008305	GO:0005576	GO:0005515	GO:0005525	GO:0005874	GO:0007017	GO:0006952
2.0_INSECT_GG3J73P03F8RT9	GO:0009055	GO:0051536	GO:0004872	GO:0005488	GO:0007155	GO:0007160	GO:0007229	GO:0008305	GO:0005515	GO:0005576	GO:0008152	GO:0016747	GO:0005525	GO:0005874	GO:0007017	GO:0005199	GO:0009277
2.0_INSECT_GG3J73P03F8S2O	GO:0004872	GO:0005488	GO:0007155	GO:0007160	GO:0007229	GO:0008305	GO:0005515	GO:0008152	GO:0016747	GO:0009055	GO:0005576	GO:0005525	GO:0005874	GO:0007017	GO:0051536	GO:0006952
2.0_INSECT_GG3J73P03F8TEQ	GO:0009055	GO:0005515
2.0_INSECT_GG3J73P03F8TH2	GO:0009055	GO:0005515	GO:0008152	GO:0016747	GO:0005576	GO:0006952	GO:0016068	GO:0051536	GO:0009755	GO:0005199	GO:0009277	GO:0004872	GO:0005488	GO:0007155	GO:0007160	GO:0007229	GO:0008305
2.0_INSECT_GG3J73P03F8U7C	GO:0005576	GO:0005515	GO:0009055
2.0_INSECT_GG3J73P03F8V4U	GO:0005576	GO:0006952	GO:0005515	GO:0009055	GO:0008152	GO:0016747
2.0_INSECT_GG3J73P03F8VD8	GO:0009055	GO:0005576	GO:0051536	GO:0005515	GO:0008152	GO:0016747	GO:0006952	GO:0005525	GO:0005874	GO:0007017	GO:0004872	GO:0005488	GO:0007155	GO:0007160	GO:0007229	GO:0008305	GO:0005199	GO:0009277	GO:0046872	GO:0016068
2.0_INSECT_GG3J73P03F8VYB	GO:0009055	GO:0005576	GO:0005515	GO:0051536	GO:0004872	GO:0005488	GO:0007155	GO:0007160	GO:0007229	GO:0008305	GO:0006952	GO:0009755	GO:0016068	GO:0008152	GO:0016747
2.0_INSECT_GG3J73P03F8VZQ	GO:0009055	GO:0051536	GO:0005576	GO:0005515	GO:0046872	GO:0008152	GO:0016747	GO:0004872	GO:0005488	GO:0007155	GO:0007160	GO:0007229	GO:0008305	GO:0005525	GO:0005874	GO:0007017	GO:0006952
2.0_INSECT_GG3J73P03F8WWK	GO:0005525	GO:0005874	GO:0007017
2.0_INSECT_GG3J73P03F8XHP	GO:0009055
2.0_INSECT_GG3J73P03F8YJ9	GO:0005515	GO:0009055	GO:0005576	GO:0008152	GO:0016747	GO:0016068	GO:0051536
2.0_INSECT_GG3J73P03F90CC	GO:0008152	GO:0016747	GO:0009055	GO:0004872	GO:0005488	GO:0007155	GO:0007160	GO:0007229	GO:0008305	GO:0005576	GO:0005515	GO:0051536	GO:0006952	GO:0016068	GO:0042309	GO:0050825	GO:0050826
2.0_INSECT_GG3J73P03F90WG	GO:0008152	GO:0016747
2.0_INSECT_GG3J73P03F910I	GO:0008152	GO:0016747	GO:0005576	GO:0006952	GO:0005515	GO:0009055	GO:0051536	GO:0004872	GO:0005488	GO:0007155	GO:0007160	GO:0007229	GO:0008305
2.0_INSECT_GG3J73P03F91WU	GO:0009055	GO:0051536	GO:0005515
2.0_INSECT_GG3J73P03F92XD	GO:0005515
2.0_INSECT_GG3J73P03F93BG	GO:0009055	GO:0005576	GO:0006952	GO:0005515
2.0_INSECT_GG3J73P03F93BK	GO:0008152	GO:0016747	GO:0009055	GO:0005576	GO:0005515	GO:0009405	GO:0051536	GO:0004872	GO:0005488	GO:0007155	GO:0007160	GO:0007229	GO:0008305	GO:0006952
2.0_INSECT_GG3J73P03F94IE	GO:0009055	GO:0005515	GO:0005199	GO:0009277	GO:0005576
2.0_INSECT_GG3J73P03F94Q1	GO:0005515	GO:0008152	GO:0016747	GO:0009055	GO:0005576	GO:0004872	GO:0005488	GO:0007155	GO:0007160	GO:0007229	GO:0008305	GO:0051536	GO:0016068	GO:0006952	GO:0005525	GO:0005874	GO:0007017	GO:0005199	GO:0009277
2.0_INSECT_GG3J73P03F954E	GO:0009055	GO:0005576	GO:0005515	GO:0008152	GO:0016747	GO:0004872	GO:0005488	GO:0007155	GO:0007160	GO:0007229	GO:0008305	GO:0005525	GO:0005874	GO:0007017	GO:0051536
2.0_INSECT_GG3J73P03F9657	GO:0009055	GO:0051536	GO:0005576	GO:0005515	GO:0005525	GO:0005874	GO:0007017	GO:0008152	GO:0016747	GO:0006952	GO:0016068	GO:0004872	GO:0005488	GO:0007155	GO:0007160	GO:0007229	GO:0008305
2.0_INSECT_GG3J73P03F96MO	GO:0009055	GO:0051536	GO:0005576	GO:0005515	GO:0042309	GO:0050825	GO:0050826	GO:0008152	GO:0016747
2.0_INSECT_GG3J73P03F96NJ	GO:0008152	GO:0016747	GO:0009055	GO:0005525	GO:0005874	GO:0007017	GO:0005576	GO:0005515
2.0_INSECT_GG3J73P03F96RI	GO:0009055	GO:0051536	GO:0004872	GO:0005488	GO:0007155	GO:0007160	GO:0007229	GO:0008305	GO:0005576	GO:0005515	GO:0008152	GO:0016747	GO:0006952
2.0_INSECT_GG3J73P03F978A	GO:0009055	GO:0051536	GO:0005576	GO:0006952	GO:0005515
2.0_INSECT_GG3J73P03F97KM	GO:0009055	GO:0005515	GO:0008152	GO:0016747	GO:0004872	GO:0005488	GO:0007155	GO:0007160	GO:0007229	GO:0008305	GO:0005525	GO:0005874	GO:0007017	GO:0005576	GO:0051536	GO:0006952	GO:0046872
2.0_INSECT_GG3J73P03F97PT	GO:0009055	GO:0005576	GO:0051536	GO:0004872	GO:0005488	GO:0007155	GO:0007160	GO:0007229	GO:0008305	GO:0005515	GO:0008152	GO:0016747	GO:0005525	GO:0005874	GO:0007017	GO:0016068
2.0_INSECT_GG3J73P03F98VW	GO:0008152	GO:0016747
2.0_INSECT_GG3J73P03F9940	GO:0009055	GO:0051536	GO:0004872	GO:0005488	GO:0007155	GO:0007160	GO:0007229	GO:0008305	GO:0005515
2.0_INSECT_GG3J73P03F99K8	GO:0009055	GO:0005576	GO:0006952	GO:0005515	GO:0008152	GO:0016747	GO:0004872	GO:0005488	GO:0007155	GO:0007160	GO:0007229	GO:0008305
2.0_INSECT_GG3J73P03F99ZA	GO:0008152	GO:0016747	GO:0009055	GO:0005515	GO:0051536	GO:0005576	GO:0004872	GO:0005488	GO:0007155	GO:0007160	GO:0007229	GO:0008305	GO:0006952	GO:0003735	GO:0005622	GO:0005840	GO:0006412	GO:0003676	GO:0008270	GO:0005525	GO:0005874	GO:0007017
2.0_INSECT_GG3J73P03F9A8U	GO:0009055
2.0_INSECT_GG3J73P03F9AOF	GO:0008152	GO:0016747	GO:0009055	GO:0005525	GO:0005874	GO:0007017	GO:0051536	GO:0005576	GO:0005515	GO:0006952	GO:0004872	GO:0005488	GO:0007155	GO:0007160	GO:0007229	GO:0008305	GO:0046872	GO:0016068	GO:0009755
2.0_INSECT_GG3J73P03F9APE	GO:0009055	GO:0005576	GO:0005515
2.0_INSECT_GG3J73P03F9B4G	GO:0009055	GO:0051536	GO:0005576	GO:0006952	GO:0005515	GO:0008152	GO:0016747
2.0_INSECT_GG3J73P03F9BEP	GO:0009055	GO:0051536	GO:0005525	GO:0005874	GO:0007017	GO:0005515	GO:0008152	GO:0016747	GO:0005576	GO:0006952	GO:0004872	GO:0005488	GO:0007155	GO:0007160	GO:0007229	GO:0008305
2.0_INSECT_GG3J73P03F9BNC	GO:0009055	GO:0004872	GO:0005488	GO:0007155	GO:0007160	GO:0007229	GO:0008305	GO:0005576	GO:0005515
2.0_INSECT_GG3J73P03F9CBR	GO:0008152	GO:0016747	GO:0009055	GO:0051536	GO:0005515	GO:0004872	GO:0005488	GO:0007155	GO:0007160	GO:0007229	GO:0008305	GO:0005576	GO:0016068	GO:0005525	GO:0005874	GO:0007017
2.0_INSECT_GG3J73P03F9DAZ	GO:0009055	GO:0051536	GO:0005515	GO:0008152	GO:0016747	GO:0005576	GO:0005525	GO:0005874	GO:0007017	GO:0004872	GO:0005488	GO:0007155	GO:0007160	GO:0007229	GO:0008305	GO:0006952
2.0_INSECT_GG3J73P03F9DV7	GO:0009055	GO:0051536	GO:0005576	GO:0008152	GO:0016747	GO:0005515	GO:0005525	GO:0005874	GO:0007017	GO:0042309	GO:0050825	GO:0050826
2.0_INSECT_GG3J73P03F9GC7	GO:0008152	GO:0016747	GO:0009055	GO:0005576	GO:0005515	GO:0016068
2.0_INSECT_GG3J73P03F9GJF	GO:0008152	GO:0016747	GO:0005515	GO:0009055	GO:0051536	GO:0005576	GO:0004872	GO:0005488	GO:0007155	GO:0007160	GO:0007229	GO:0008305	GO:0005199	GO:0009277
2.0_INSECT_GG3J73P03F9H82	GO:0009055	GO:0005515	GO:0005576	GO:0004872	GO:0005488	GO:0007155	GO:0007160	GO:0007229	GO:0008305	GO:0051536	GO:0008152	GO:0016747
2.0_INSECT_GG3J73P03F9HBD	GO:0009055	GO:0005515	GO:0005525	GO:0005874	GO:0007017	GO:0004872	GO:0005488	GO:0007155	GO:0007160	GO:0007229	GO:0008305	GO:0005576	GO:0008152	GO:0016747	GO:0051536	GO:0046872	GO:0006952	GO:0016068
2.0_INSECT_GG3J73P03F9HKN	GO:0009055	GO:0008152	GO:0016747	GO:0051536	GO:0005576	GO:0005515	GO:0006952	GO:0004872	GO:0005488	GO:0007155	GO:0007160	GO:0007229	GO:0008305	GO:0046872
2.0_INSECT_GG3J73P03F9IEL	GO:0009055	GO:0005576	GO:0006952	GO:0005515	GO:0008152	GO:0016747	GO:0051536	GO:0004872	GO:0005488	GO:0007155	GO:0007160	GO:0007229	GO:0008305	GO:0005199	GO:0009277
2.0_INSECT_GG3J73P03F9IWI	GO:0009055	GO:0051536	GO:0008152	GO:0016747
2.0_INSECT_GG3J73P03F9IX7	GO:0009055	GO:0005576	GO:0005515
2.0_INSECT_GG3J73P03F9JFN	GO:0008152	GO:0016747	GO:0009055	GO:0005515	GO:0051536
2.0_INSECT_GG3J73P03F9K6N	GO:0008152	GO:0016747	GO:0009055	GO:0051536	GO:0005576	GO:0005515	GO:0042309	GO:0050825	GO:0050826	GO:0005525	GO:0005874	GO:0007017
2.0_INSECT_GG3J73P03F9KA2	GO:0009055	GO:0005515	GO:0008152	GO:0016747	GO:0005576
2.0_INSECT_GG3J73P03F9KCW	GO:0009055	GO:0005576	GO:0005515	GO:0051536
2.0_INSECT_GG3J73P03F9KFQ	GO:0009055	GO:0005515
2.0_INSECT_GG3J73P03F9L1O	GO:0009055	GO:0005515	GO:0005576	GO:0051536	GO:0008152	GO:0016747	GO:0046872	GO:0004252	GO:0006508
2.0_INSECT_GG3J73P03F9LXV	GO:0008152	GO:0016747	GO:0005576	GO:0009055	GO:0051536	GO:0005515	GO:0006952	GO:0004872	GO:0005488	GO:0007155	GO:0007160	GO:0007229	GO:0008305	GO:0005525	GO:0005874	GO:0007017	GO:0046872	GO:0009755
2.0_INSECT_GG3J73P03F9LYH	GO:0008152	GO:0016747
2.0_INSECT_GG3J73P03F9M6D	GO:0008152	GO:0016747	GO:0009055
2.0_INSECT_GG3J73P03F9N48	GO:0009055	GO:0051536	GO:0005515	GO:0005576	GO:0006952	GO:0005525	GO:0005874	GO:0007017	GO:0008152	GO:0016747	GO:0004872	GO:0005488	GO:0007155	GO:0007160	GO:0007229	GO:0008305
2.0_INSECT_GG3J73P03F9N5B	GO:0009055	GO:0005576	GO:0005515	GO:0008152	GO:0016747	GO:0005525	GO:0005874	GO:0007017	GO:0051536	GO:0004872	GO:0005488	GO:0007155	GO:0007160	GO:0007229	GO:0008305	GO:0006952
2.0_INSECT_GG3J73P03F9NET	GO:0009055	GO:0005525	GO:0005874	GO:0007017	GO:0051536	GO:0005515	GO:0008152	GO:0016747	GO:0005576	GO:0009405	GO:0004872	GO:0005488	GO:0007155	GO:0007160	GO:0007229	GO:0008305	GO:0006952
2.0_INSECT_GG3J73P03F9NQ9	GO:0008152	GO:0016747	GO:0009055
2.0_INSECT_GG3J73P03F9NZS	GO:0009055	GO:0005515	GO:0005199	GO:0009277	GO:0005576	GO:0051536	GO:0005525	GO:0005874	GO:0007017	GO:0009755	GO:0004872	GO:0005488	GO:0007155	GO:0007160	GO:0007229	GO:0008305	GO:0006952	GO:0008152	GO:0016747	GO:0016068
2.0_INSECT_GG3J73P03F9O1J	GO:0009055	GO:0004872	GO:0005488	GO:0007155	GO:0007160	GO:0007229	GO:0008305	GO:0005576	GO:0005515	GO:0051536	GO:0006952	GO:0008152	GO:0016747	GO:0005525	GO:0005874	GO:0007017	GO:0009755	GO:0042309	GO:0050825	GO:0050826	GO:0016068	GO:0005199	GO:0009277
2.0_INSECT_GG3J73P03F9OHM	GO:0008152	GO:0016747	GO:0005525	GO:0005874	GO:0007017	GO:0005576	GO:0005515	GO:0009055	GO:0051536	GO:0006952
2.0_INSECT_GG3J73P03F9OVX	GO:0008152	GO:0016747	GO:0009055	GO:0005515	GO:0005576	GO:0006952	GO:0009755	GO:0051536	GO:0004872	GO:0005488	GO:0007155	GO:0007160	GO:0007229	GO:0008305	GO:0005525	GO:0005874	GO:0007017
2.0_INSECT_GG3J73P03F9PD3	GO:0009055
2.0_INSECT_GG3J73P03F9PXQ	GO:0008152	GO:0016747	GO:0009055	GO:0005515
2.0_INSECT_GG3J73P03F9PY9	GO:0008152	GO:0016747	GO:0009055	GO:0005576	GO:0006952	GO:0005515	GO:0005525	GO:0005874	GO:0007017	GO:0051536
2.0_INSECT_GG3J73P03F9Q5P	GO:0008152	GO:0016747
2.0_INSECT_GG3J73P03F9QBI	GO:0008152	GO:0016747	GO:0005576	GO:0004872	GO:0005488	GO:0007155	GO:0007160	GO:0007229	GO:0008305	GO:0001558	GO:0005520	GO:0009055	GO:0051536	GO:0005515	GO:0006952
2.0_INSECT_GG3J73P03F9QD6	GO:0008152	GO:0016747	GO:0005515	GO:0004872	GO:0005488	GO:0007155	GO:0007160	GO:0007229	GO:0008305	GO:0009055	GO:0005576	GO:0051536	GO:0006952
2.0_INSECT_GG3J73P03F9QD8	GO:0005576	GO:0005515
2.0_INSECT_GG3J73P03F9QJ3	GO:0009055	GO:0005515	GO:0005576	GO:0006952	GO:0008152	GO:0016747	GO:0051536	GO:0004872	GO:0005488	GO:0007155	GO:0007160	GO:0007229	GO:0008305	GO:0005199	GO:0009277	GO:0046872	GO:0005525	GO:0005874	GO:0007017
2.0_INSECT_GG3J73P03F9QKJ	GO:0009055	GO:0005515	GO:0005525	GO:0005874	GO:0007017	GO:0008152	GO:0016747	GO:0005576	GO:0004872	GO:0005488	GO:0007155	GO:0007160	GO:0007229	GO:0008305	GO:0006952	GO:0051536	GO:0009755	GO:0046872
2.0_INSECT_GG3J73P03F9RFC	GO:0008152	GO:0016747	GO:0009055	GO:0051536	GO:0005515	GO:0005525	GO:0005874	GO:0007017	GO:0004872	GO:0005488	GO:0007155	GO:0007160	GO:0007229	GO:0008305	GO:0005576
2.0_INSECT_GG3J73P03F9RIU	GO:0009055	GO:0005576	GO:0005515	GO:0004872	GO:0005488	GO:0007155	GO:0007160	GO:0007229	GO:0008305	GO:0008152	GO:0016747
2.0_INSECT_GG3J73P03F9RMQ	GO:0009055	GO:0008152	GO:0016747	GO:0051536	GO:0005515	GO:0005576	GO:0006952	GO:0004872	GO:0005488	GO:0007155	GO:0007160	GO:0007229	GO:0008305	GO:0005525	GO:0005874	GO:0007017
2.0_INSECT_GG3J73P03F9RQX	GO:0009055	GO:0005576	GO:0006952	GO:0016068	GO:0005515	GO:0051536	GO:0008152	GO:0016747	GO:0004872	GO:0005488	GO:0007155	GO:0007160	GO:0007229	GO:0008305
2.0_INSECT_GG3J73P03F9SUH	GO:0008152	GO:0016747	GO:0009055	GO:0005515	GO:0005525	GO:0005874	GO:0007017	GO:0005576	GO:0006952
2.0_INSECT_GG3J73P03F9TX5	GO:0009055	GO:0005576	GO:0008152	GO:0016747	GO:0005515	GO:0051536	GO:0004872	GO:0005488	GO:0007155	GO:0007160	GO:0007229	GO:0008305
2.0_INSECT_GG3J73P03F9U5F	GO:0009055	GO:0051536	GO:0005515	GO:0008152	GO:0016747
2.0_INSECT_GG3J73P03F9V7Y	GO:0009055	GO:0005515	GO:0008152	GO:0016747	GO:0004872	GO:0005488	GO:0007155	GO:0007160	GO:0007229	GO:0008305	GO:0005576	GO:0051536
2.0_INSECT_GG3J73P03F9W37	GO:0009055	GO:0005515	GO:0005576	GO:0008152	GO:0016747	GO:0005525	GO:0005874	GO:0007017	GO:0004872	GO:0005488	GO:0007155	GO:0007160	GO:0007229	GO:0008305	GO:0051536
2.0_INSECT_GG3J73P03F9W4O	GO:0009055	GO:0005576	GO:0005515
2.0_INSECT_GG3J73P03F9W7E	GO:0008152	GO:0016747	GO:0005576
2.0_INSECT_GG3J73P03F9W7N	GO:0009055	GO:0005525	GO:0005874	GO:0007017	GO:0005576	GO:0005515
2.0_INSECT_GG3J73P03F9WKE	GO:0009055	GO:0005515	GO:0051536	GO:0005525	GO:0005874	GO:0007017	GO:0008152	GO:0016747	GO:0005576	GO:0006952	GO:0004872	GO:0005488	GO:0007155	GO:0007160	GO:0007229	GO:0008305	GO:0042309	GO:0050825	GO:0050826
2.0_INSECT_GG3J73P03F9WLP	GO:0008152	GO:0016747	GO:0009055	GO:0004872	GO:0005488	GO:0007155	GO:0007160	GO:0007229	GO:0008305	GO:0005576	GO:0005515	GO:0005199	GO:0009277	GO:0051536	GO:0005525	GO:0005874	GO:0007017
2.0_INSECT_GG3J73P03F9X5B	GO:0009055
2.0_INSECT_GG3J73P03F9XA7	GO:0009055	GO:0005576	GO:0005515	GO:0008152	GO:0016747
2.0_INSECT_GG3J73P03F9XP6	GO:0009055	GO:0005576	GO:0005515	GO:0005525	GO:0005874	GO:0007017	GO:0008152	GO:0016747	GO:0016068	GO:0051536
2.0_INSECT_GG3J73P03F9Y8E	GO:0009055	GO:0051536	GO:0005576	GO:0005515	GO:0004872	GO:0005488	GO:0007155	GO:0007160	GO:0007229	GO:0008305	GO:0006952	GO:0008152	GO:0016747	GO:0016068
2.0_INSECT_GG3J73P03F9ZE0	GO:0009055	GO:0005576
2.0_INSECT_GG3J73P03FE3K3	GO:0004872	GO:0005488	GO:0007155	GO:0007160	GO:0007229	GO:0008305	GO:0005576	GO:0005515	GO:0009055	GO:0051536	GO:0005525	GO:0005874	GO:0007017	GO:0005199	GO:0009277	GO:0008152	GO:0016747	GO:0006952
2.0_INSECT_GG3J73P03FE3MX	GO:0009055	GO:0051536	GO:0005525	GO:0005874	GO:0007017	GO:0005515	GO:0005576	GO:0008152	GO:0016747	GO:0004872	GO:0005488	GO:0007155	GO:0007160	GO:0007229	GO:0008305	GO:0006952	GO:0009755
2.0_INSECT_GG3J73P03FE6OO	GO:0008152	GO:0016747	GO:0009055	GO:0005525	GO:0005874	GO:0007017	GO:0005515	GO:0005576	GO:0009405	GO:0016068	GO:0051536	GO:0006952	GO:0004872	GO:0005488	GO:0007155	GO:0007160	GO:0007229	GO:0008305
2.0_INSECT_GG3J73P03FE840	GO:0005576	GO:0009055	GO:0005515
2.0_INSECT_GG3J73P03FE8RY	GO:0009055	GO:0005576	GO:0005515
2.0_INSECT_GG3J73P03FE8WN	GO:0009055	GO:0051536	GO:0005576	GO:0005515	GO:0008152	GO:0016747	GO:0004872	GO:0005488	GO:0007155	GO:0007160	GO:0007229	GO:0008305	GO:0006952	GO:0005525	GO:0005874	GO:0007017	GO:0016068
2.0_INSECT_GG3J73P03FE9PR	GO:0009055	GO:0005576	GO:0005515
2.0_INSECT_GG3J73P03FF167	GO:0009055	GO:0005515	GO:0008152	GO:0016747	GO:0005576	GO:0005199	GO:0009277	GO:0006952	GO:0009405
2.0_INSECT_GG3J73P03FF1CL	GO:0009055	GO:0005515	GO:0008152	GO:0016747	GO:0005576	GO:0006952	GO:0051536	GO:0004252	GO:0006508	GO:0005525	GO:0005874	GO:0007017
2.0_INSECT_GG3J73P03FF1NY	GO:0009055
2.0_INSECT_GG3J73P03FF29M	GO:0009055	GO:0005515
2.0_INSECT_GG3J73P03FF2HQ	GO:0009055	GO:0005576	GO:0005515	GO:0046872	GO:0004872	GO:0005488	GO:0007155	GO:0007160	GO:0007229	GO:0008305	GO:0006952	GO:0008152	GO:0016747	GO:0005525	GO:0005874	GO:0007017
2.0_INSECT_GG3J73P03FF2TS	GO:0009055	GO:0005515
2.0_INSECT_GG3J73P03FF3HL	GO:0009055	GO:0051536	GO:0005576	GO:0005515
2.0_INSECT_GG3J73P03FF4M6	GO:0005576	GO:0005515	GO:0009055	GO:0051536	GO:0006952	GO:0008152	GO:0016747	GO:0004872	GO:0005488	GO:0007155	GO:0007160	GO:0007229	GO:0008305	GO:0005525	GO:0005874	GO:0007017
2.0_INSECT_GG3J73P03FF4SV	GO:0009055	GO:0008152	GO:0016747	GO:0005576	GO:0005515	GO:0004872	GO:0005488	GO:0007155	GO:0007160	GO:0007229	GO:0008305	GO:0006952	GO:0005525	GO:0005874	GO:0007017	GO:0051536
2.0_INSECT_GG3J73P03FF5CU	GO:0009055	GO:0005576	GO:0005515	GO:0008152	GO:0016747	GO:0004872	GO:0005488	GO:0007155	GO:0007160	GO:0007229	GO:0008305	GO:0009755	GO:0051536	GO:0006952	GO:0005525	GO:0005874	GO:0007017	GO:0009405
2.0_INSECT_GG3J73P03FF6KR	GO:0009055	GO:0005515	GO:0008152	GO:0016747	GO:0005576	GO:0051536	GO:0004872	GO:0005488	GO:0007155	GO:0007160	GO:0007229	GO:0008305	GO:0005525	GO:0005874	GO:0007017
2.0_INSECT_GG3J73P03FF6QJ	GO:0009055	GO:0051536	GO:0005576	GO:0005515	GO:0008152	GO:0016747	GO:0006952	GO:0004872	GO:0005488	GO:0007155	GO:0007160	GO:0007229	GO:0008305	GO:0009405
2.0_INSECT_GG3J73P03FF6QT	GO:0009055	GO:0005576	GO:0005515	GO:0008152	GO:0016747	GO:0051536	GO:0004872	GO:0005488	GO:0007155	GO:0007160	GO:0007229	GO:0008305	GO:0006952	GO:0005525	GO:0005874	GO:0007017
2.0_INSECT_GG3J73P03FF7EK	GO:0008152	GO:0016747	GO:0009055	GO:0005515	GO:0051536	GO:0005576	GO:0006952	GO:0004872	GO:0005488	GO:0007155	GO:0007160	GO:0007229	GO:0008305
2.0_INSECT_GG3J73P03FF7I2	GO:0009055	GO:0051536	GO:0005576	GO:0005515	GO:0006952	GO:0005525	GO:0005874	GO:0007017	GO:0008152	GO:0016747	GO:0005199	GO:0009277
2.0_INSECT_GG3J73P03FF7O1	GO:0005576	GO:0009055	GO:0006952	GO:0005515	GO:0008152	GO:0016747
2.0_INSECT_GG3J73P03FF8PC	GO:0009055	GO:0005576	GO:0006952	GO:0008152	GO:0016747	GO:0051536	GO:0005515	GO:0042309	GO:0050825	GO:0050826
2.0_INSECT_GG3J73P03FF9EM	GO:0009055	GO:0005576	GO:0005515
2.0_INSECT_GG3J73P03FF9X3	GO:0008152	GO:0016747	GO:0009055	GO:0005576	GO:0005515	GO:0051536	GO:0005525	GO:0005874	GO:0007017	GO:0004872	GO:0005488	GO:0007155	GO:0007160	GO:0007229	GO:0008305	GO:0006952
2.0_INSECT_GG3J73P03FFB2N	GO:0009055	GO:0005515	GO:0051536	GO:0005576	GO:0004872	GO:0005488	GO:0007155	GO:0007160	GO:0007229	GO:0008305	GO:0005199	GO:0009277	GO:0008152	GO:0016747	GO:0006952	GO:0005525	GO:0005874	GO:0007017
2.0_INSECT_GG3J73P03FFB8F	GO:0009055	GO:0005525	GO:0005874	GO:0007017	GO:0005515	GO:0008152	GO:0016747	GO:0005576	GO:0006952	GO:0051536	GO:0004872	GO:0005488	GO:0007155	GO:0007160	GO:0007229	GO:0008305	GO:0005199	GO:0009277
2.0_INSECT_GG3J73P03FFC3M	GO:0008152	GO:0016747	GO:0009055	GO:0005525	GO:0005874	GO:0007017	GO:0005576	GO:0006952	GO:0005515	GO:0051536	GO:0046872	GO:0009755
2.0_INSECT_GG3J73P03FFDGH	GO:0008152	GO:0016747	GO:0005515	GO:0009055	GO:0051536	GO:0005525	GO:0005874	GO:0007017	GO:0005199	GO:0009277	GO:0005576	GO:0004872	GO:0005488	GO:0007155	GO:0007160	GO:0007229	GO:0008305	GO:0042309	GO:0050825	GO:0050826	GO:0006952	GO:0046872
2.0_INSECT_GG3J73P03FFDIH	GO:0005515	GO:0009055	GO:0005576	GO:0008152	GO:0016747	GO:0051536	GO:0004872	GO:0005488	GO:0007155	GO:0007160	GO:0007229	GO:0008305	GO:0006952
2.0_INSECT_GG3J73P03FFEY1	GO:0005515
2.0_INSECT_GG3J73P03FFF04	GO:0009055	GO:0005525	GO:0005874	GO:0007017	GO:0005576	GO:0005515	GO:0008152	GO:0016747	GO:0006952	GO:0051536	GO:0004872	GO:0005488	GO:0007155	GO:0007160	GO:0007229	GO:0008305
2.0_INSECT_GG3J73P03FFH8F	GO:0009055	GO:0005515	GO:0005576	GO:0006952	GO:0004872	GO:0005488	GO:0007155	GO:0007160	GO:0007229	GO:0008305	GO:0008152	GO:0016747	GO:0051536	GO:0005525	GO:0005874	GO:0007017
2.0_INSECT_GG3J73P03FFH8W	GO:0009055	GO:0008152	GO:0016747	GO:0005515	GO:0005576	GO:0016068	GO:0051536	GO:0006952
2.0_INSECT_GG3J73P03FFHH1	GO:0008152	GO:0016747	GO:0009055	GO:0051536	GO:0005576	GO:0005515	GO:0016068	GO:0046872	GO:0006952
2.0_INSECT_GG3J73P03FFHPQ	GO:0005515	GO:0005525	GO:0005874	GO:0007017	GO:0009055	GO:0005576	GO:0008152	GO:0016747	GO:0051536	GO:0006952
2.0_INSECT_GG3J73P03FFJAS	GO:0009055	GO:0008152	GO:0016747	GO:0005576	GO:0005515	GO:0051536	GO:0006952	GO:0005525	GO:0005874	GO:0007017	GO:0004872	GO:0005488	GO:0007155	GO:0007160	GO:0007229	GO:0008305
2.0_INSECT_GG3J73P03FFJGZ	GO:0016068	GO:0008152	GO:0016747	GO:0009055	GO:0051536	GO:0005515	GO:0005576	GO:0005525	GO:0005874	GO:0007017
2.0_INSECT_GG3J73P03FFK41	GO:0009055	GO:0005515	GO:0008152	GO:0016747	GO:0051536	GO:0005576	GO:0004872	GO:0005488	GO:0007155	GO:0007160	GO:0007229	GO:0008305
2.0_INSECT_GG3J73P03FFKOX	GO:0009055	GO:0008152	GO:0016747	GO:0051536	GO:0005515	GO:0005525	GO:0005874	GO:0007017	GO:0005576	GO:0004872	GO:0005488	GO:0007155	GO:0007160	GO:0007229	GO:0008305	GO:0006952	GO:0016068
2.0_INSECT_GG3J73P03FFKX6	GO:0009055	GO:0005525	GO:0005874	GO:0007017	GO:0005576	GO:0005515	GO:0008152	GO:0016747	GO:0051536	GO:0006952	GO:0004872	GO:0005488	GO:0007155	GO:0007160	GO:0007229	GO:0008305	GO:0046872
2.0_INSECT_GG3J73P03FFLM8	GO:0005515	GO:0009055	GO:0005576	GO:0004872	GO:0005488	GO:0007155	GO:0007160	GO:0007229	GO:0008305
2.0_INSECT_GG3J73P03FFLSI	GO:0008152	GO:0016747	GO:0009055	GO:0005576	GO:0005515	GO:0005525	GO:0005874	GO:0007017	GO:0006952	GO:0051536	GO:0016068	GO:0004872	GO:0005488	GO:0007155	GO:0007160	GO:0007229	GO:0008305
2.0_INSECT_GG3J73P03FFN5H	GO:0008152	GO:0016747	GO:0009055	GO:0051536	GO:0005515	GO:0005576	GO:0005199	GO:0009277	GO:0004872	GO:0005488	GO:0007155	GO:0007160	GO:0007229	GO:0008305
2.0_INSECT_GG3J73P03FFOAC	GO:0005515	GO:0009055
2.0_INSECT_GG3J73P03FFOG5	GO:0009055	GO:0008152	GO:0016747	GO:0005515	GO:0005576	GO:0051536	GO:0006952	GO:0005525	GO:0005874	GO:0007017	GO:0004872	GO:0005488	GO:0007155	GO:0007160	GO:0007229	GO:0008305
2.0_INSECT_GG3J73P03FFOXK	GO:0009055	GO:0005515	GO:0046872	GO:0051536
2.0_INSECT_GG3J73P03FFPW3	GO:0009055	GO:0051536	GO:0005576	GO:0005515	GO:0008152	GO:0016747	GO:0004872	GO:0005488	GO:0007155	GO:0007160	GO:0007229	GO:0008305	GO:0006952	GO:0009755
2.0_INSECT_GG3J73P03FFQ02	GO:0005515	GO:0009055	GO:0051536	GO:0005576	GO:0009755	GO:0008152	GO:0016747	GO:0004872	GO:0005488	GO:0007155	GO:0007160	GO:0007229	GO:0008305	GO:0046872	GO:0006952	GO:0042309	GO:0050825	GO:0050826
2.0_INSECT_GG3J73P03FFQ4O	GO:0009055	GO:0051536	GO:0005576	GO:0006952	GO:0005515	GO:0008152	GO:0016747	GO:0005525	GO:0005874	GO:0007017
2.0_INSECT_GG3J73P03FFQO8	GO:0009055	GO:0008152	GO:0016747	GO:0005576
2.0_INSECT_GG3J73P03FFQPN	GO:0009055	GO:0005199	GO:0009277	GO:0005515	GO:0008152	GO:0016747	GO:0005525	GO:0005874	GO:0007017	GO:0005576
2.0_INSECT_GG3J73P03FFQXL	GO:0005525	GO:0005874	GO:0007017	GO:0009055	GO:0005576	GO:0006952	GO:0005515	GO:0051536	GO:0008152	GO:0016747
2.0_INSECT_GG3J73P03FFRJW	GO:0009055	GO:0005515
2.0_INSECT_GG3J73P03FFS0K	GO:0009055	GO:0005525	GO:0005874	GO:0007017
2.0_INSECT_GG3J73P03FFS1U	GO:0009055	GO:0005515	GO:0005199	GO:0009277	GO:0008152	GO:0016747	GO:0004872	GO:0005488	GO:0007155	GO:0007160	GO:0007229	GO:0008305	GO:0051536	GO:0005576	GO:0005525	GO:0005874	GO:0007017	GO:0006952	GO:0042309	GO:0050825	GO:0050826
2.0_INSECT_GG3J73P03FFSQB	GO:0009055	GO:0005515	GO:0008152	GO:0016747	GO:0051536	GO:0005576	GO:0006952	GO:0004872	GO:0005488	GO:0007155	GO:0007160	GO:0007229	GO:0008305	GO:0016068
2.0_INSECT_GG3J73P03FFSSX	GO:0008152	GO:0016747	GO:0009055	GO:0005515
2.0_INSECT_GG3J73P03FFT0K	GO:0008152	GO:0016747	GO:0009055	GO:0005576	GO:0005515	GO:0005525	GO:0005874	GO:0007017	GO:0051536	GO:0006952
2.0_INSECT_GG3J73P03FFTMR	GO:0009055	GO:0051536	GO:0004872	GO:0005488	GO:0007155	GO:0007160	GO:0007229	GO:0008305	GO:0005576	GO:0005515	GO:0008152	GO:0016747	GO:0006952	GO:0016068
2.0_INSECT_GG3J73P03FFTO7	GO:0009055	GO:0051536	GO:0004872	GO:0005488	GO:0007155	GO:0007160	GO:0007229	GO:0008305	GO:0005576	GO:0006952	GO:0005515	GO:0008152	GO:0016747	GO:0009755
2.0_INSECT_GG3J73P03FFUEX	GO:0009055	GO:0005515	GO:0005576
2.0_INSECT_GG3J73P03FFV9Z	GO:0005576	GO:0006952	GO:0005515	GO:0009405	GO:0008152	GO:0016747	GO:0009055	GO:0004872	GO:0005488	GO:0007155	GO:0007160	GO:0007229	GO:0008305	GO:0051536
2.0_INSECT_GG3J73P03FFW85	GO:0009055	GO:0008152	GO:0016747	GO:0005525	GO:0005874	GO:0007017	GO:0005515	GO:0051536	GO:0005576	GO:0006952
2.0_INSECT_GG3J73P03FFW9D	GO:0009055	GO:0005525	GO:0005874	GO:0007017	GO:0005515	GO:0005576	GO:0009755	GO:0051536	GO:0004252	GO:0006508	GO:0008152	GO:0016747	GO:0006952	GO:0016068	GO:0004872	GO:0005488	GO:0007155	GO:0007160	GO:0007229	GO:0008305
2.0_INSECT_GG3J73P03FFWGX	GO:0005525	GO:0005874	GO:0007017	GO:0008152	GO:0016747	GO:0009055	GO:0051536	GO:0004872	GO:0005488	GO:0007155	GO:0007160	GO:0007229	GO:0008305	GO:0005515	GO:0005576	GO:0009755
2.0_INSECT_GG3J73P03FFWI8	GO:0009055	GO:0005515
2.0_INSECT_GG3J73P03FFWLZ	GO:0009055	GO:0005515
2.0_INSECT_GG3J73P03FFZHT	GO:0008152	GO:0016747	GO:0009055	GO:0005576
2.0_INSECT_GG3J73P03FFZSI	GO:0008152	GO:0016747	GO:0005576	GO:0009055	GO:0005515	GO:0051536	GO:0004872	GO:0005488	GO:0007155	GO:0007160	GO:0007229	GO:0008305	GO:0006952	GO:0005525	GO:0005874	GO:0007017	GO:0005199	GO:0009277
2.0_INSECT_GG3J73P03FG15I	GO:0005576	GO:0009055	GO:0005515	GO:0008152	GO:0016747	GO:0006952	GO:0004872	GO:0005488	GO:0007155	GO:0007160	GO:0007229	GO:0008305	GO:0051536	GO:0005525	GO:0005874	GO:0007017
2.0_INSECT_GG3J73P03FG1NO	GO:0004872	GO:0005488	GO:0007155	GO:0007160	GO:0007229	GO:0008305	GO:0005576	GO:0005515
2.0_INSECT_GG3J73P03FG2D3	GO:0009055	GO:0051536	GO:0005576	GO:0005515	GO:0008152	GO:0016747	GO:0006952	GO:0004872	GO:0005488	GO:0007155	GO:0007160	GO:0007229	GO:0008305
2.0_INSECT_GG3J73P03FG2O8	GO:0009055	GO:0005515	GO:0005576	GO:0006952	GO:0004872	GO:0005488	GO:0007155	GO:0007160	GO:0007229	GO:0008305	GO:0008152	GO:0016747	GO:0051536	GO:0005525	GO:0005874	GO:0007017	GO:0046872
2.0_INSECT_GG3J73P03FG4FE	GO:0009055	GO:0005576	GO:0005515	GO:0005525	GO:0005874	GO:0007017
2.0_INSECT_GG3J73P03FG4H2	GO:0005515	GO:0005576	GO:0004872	GO:0005488	GO:0007155	GO:0007160	GO:0007229	GO:0008305	GO:0009055	GO:0008152	GO:0016747	GO:0051536	GO:0006952
2.0_INSECT_GG3J73P03FG4LA	GO:0008152	GO:0016747	GO:0009055	GO:0005515	GO:0005576	GO:0051536	GO:0005525	GO:0005874	GO:0007017
2.0_INSECT_GG3J73P03FG56H	GO:0009055	GO:0051536	GO:0005576	GO:0006952	GO:0005515	GO:0009755	GO:0005199	GO:0009277	GO:0008152	GO:0016747	GO:0004872	GO:0005488	GO:0007155	GO:0007160	GO:0007229	GO:0008305	GO:0016068
2.0_INSECT_GG3J73P03FG5H1	GO:0009055	GO:0005515
2.0_INSECT_GG3J73P03FG661	GO:0008152	GO:0016747	GO:0009055	GO:0005515
2.0_INSECT_GG3J73P03FG6CO	GO:0009055	GO:0005515
2.0_INSECT_GG3J73P03FG7JM	GO:0004872	GO:0005488	GO:0007155	GO:0007160	GO:0007229	GO:0008305	GO:0005576	GO:0005515
2.0_INSECT_GG3J73P03FG88N	GO:0009055	GO:0051536	GO:0005525	GO:0005874	GO:0007017	GO:0005576	GO:0005515	GO:0004872	GO:0005488	GO:0007155	GO:0007160	GO:0007229	GO:0008305	GO:0008152	GO:0016747	GO:0006952	GO:0016068
2.0_INSECT_GG3J73P03FG8DH	GO:0005525	GO:0005874	GO:0007017	GO:0005576	GO:0009055	GO:0051536	GO:0004872	GO:0005488	GO:0007155	GO:0007160	GO:0007229	GO:0008305	GO:0005515	GO:0008152	GO:0016747	GO:0006952
2.0_INSECT_GG3J73P03FG8GP	GO:0009055	GO:0005576	GO:0006952	GO:0005515	GO:0008152	GO:0016747	GO:0051536	GO:0004872	GO:0005488	GO:0007155	GO:0007160	GO:0007229	GO:0008305
2.0_INSECT_GG3J73P03FG8PU	GO:0009055	GO:0004872	GO:0005488	GO:0007155	GO:0007160	GO:0007229	GO:0008305	GO:0005576	GO:0006952	GO:0005515	GO:0008152	GO:0016747	GO:0005525	GO:0005874	GO:0007017	GO:0051536	GO:0009755
2.0_INSECT_GG3J73P03FG8WV	GO:0009055	GO:0051536	GO:0005576	GO:0005515	GO:0004872	GO:0005488	GO:0007155	GO:0007160	GO:0007229	GO:0008305	GO:0008152	GO:0016747	GO:0006952	GO:0005525	GO:0005874	GO:0007017
2.0_INSECT_GG3J73P03FG9NC	GO:0008152	GO:0016747	GO:0005576	GO:0009055	GO:0005515
2.0_INSECT_GG3J73P03FGAX9	GO:0009055	GO:0051536	GO:0005515
2.0_INSECT_GG3J73P03FGBK0	GO:0005515	GO:0009055	GO:0051536	GO:0005576	GO:0004872	GO:0005488	GO:0007155	GO:0007160	GO:0007229	GO:0008305	GO:0008152	GO:0016747	GO:0006952	GO:0005199	GO:0009277	GO:0005525	GO:0005874	GO:0007017
2.0_INSECT_GG3J73P03FGBNS	GO:0008152	GO:0016747	GO:0009055	GO:0005515	GO:0005576	GO:0051536	GO:0004872	GO:0005488	GO:0007155	GO:0007160	GO:0007229	GO:0008305	GO:0006952	GO:0016068	GO:0005525	GO:0005874	GO:0007017	GO:0005199	GO:0009277
2.0_INSECT_GG3J73P03FGBVN	GO:0009055	GO:0008152	GO:0016747	GO:0005576	GO:0005515	GO:0005525	GO:0005874	GO:0007017	GO:0051536	GO:0006952
2.0_INSECT_GG3J73P03FGC6Y	GO:0009055	GO:0005515	GO:0008152	GO:0016747	GO:0051536	GO:0005576	GO:0006952
2.0_INSECT_GG3J73P03FGCDX	GO:0009055	GO:0005515	GO:0005576	GO:0006952	GO:0008152	GO:0016747	GO:0005525	GO:0005874	GO:0007017	GO:0004872	GO:0005488	GO:0007155	GO:0007160	GO:0007229	GO:0008305	GO:0051536	GO:0009755
2.0_INSECT_GG3J73P03FGCEC	GO:0005576	GO:0004872	GO:0005488	GO:0007155	GO:0007160	GO:0007229	GO:0008305	GO:0009055	GO:0006952	GO:0005515	GO:0008152	GO:0016747	GO:0005525	GO:0005874	GO:0007017	GO:0051536
2.0_INSECT_GG3J73P03FGDIJ	GO:0009055	GO:0004872	GO:0005488	GO:0007155	GO:0007160	GO:0007229	GO:0008305	GO:0005576	GO:0005515	GO:0051536	GO:0006952	GO:0016068	GO:0008152	GO:0016747	GO:0005525	GO:0005874	GO:0007017
2.0_INSECT_GG3J73P03FGE4W	GO:0009055	GO:0051536	GO:0005576	GO:0005515	GO:0042309	GO:0050825	GO:0050826	GO:0008152	GO:0016747	GO:0006952
2.0_INSECT_GG3J73P03FGE8A	GO:0009055	GO:0005576	GO:0051536	GO:0004872	GO:0005488	GO:0007155	GO:0007160	GO:0007229	GO:0008305	GO:0005515	GO:0005525	GO:0005874	GO:0007017	GO:0006952	GO:0008152	GO:0016747	GO:0005199	GO:0009277	GO:0046872
2.0_INSECT_GG3J73P03FGEUC	GO:0008152	GO:0016747	GO:0009055	GO:0005515	GO:0005576	GO:0006952	GO:0051536	GO:0004872	GO:0005488	GO:0007155	GO:0007160	GO:0007229	GO:0008305	GO:0005525	GO:0005874	GO:0007017	GO:0046872
2.0_INSECT_GG3J73P03FGEVA	GO:0005525	GO:0005874	GO:0007017	GO:0005576	GO:0006952	GO:0005515	GO:0008152	GO:0016747	GO:0009055	GO:0016068	GO:0051536
2.0_INSECT_GG3J73P03FGEZ0	GO:0009055	GO:0051536	GO:0008152	GO:0016747	GO:0005515	GO:0005576	GO:0004872	GO:0005488	GO:0007155	GO:0007160	GO:0007229	GO:0008305	GO:0006952	GO:0005525	GO:0005874	GO:0007017
2.0_INSECT_GG3J73P03FGF1Y	GO:0008152	GO:0016747	GO:0009055	GO:0004872	GO:0005488	GO:0007155	GO:0007160	GO:0007229	GO:0008305	GO:0005576	GO:0051536	GO:0005515	GO:0005525	GO:0005874	GO:0007017	GO:0009755
2.0_INSECT_GG3J73P03FGFQ7	GO:0009055	GO:0051536	GO:0005576	GO:0005515
2.0_INSECT_GG3J73P03FGHEK	GO:0005515
2.0_INSECT_GG3J73P03FGICJ	GO:0009055	GO:0005525	GO:0005874	GO:0007017	GO:0005515	GO:0051536	GO:0004872	GO:0005488	GO:0007155	GO:0007160	GO:0007229	GO:0008305	GO:0008152	GO:0016747	GO:0005576	GO:0006952	GO:0016068
2.0_INSECT_GG3J73P03FGIPK	GO:0008152	GO:0016747	GO:0009055	GO:0005576	GO:0005515
2.0_INSECT_GG3J73P03FGJIE	GO:0009055	GO:0005576	GO:0005515	GO:0051536	GO:0004872	GO:0005488	GO:0007155	GO:0007160	GO:0007229	GO:0008305	GO:0009755	GO:0008152	GO:0016747	GO:0016068	GO:0006952	GO:0005525	GO:0005874	GO:0007017
2.0_INSECT_GG3J73P03FGJUP	GO:0009055	GO:0005525	GO:0005874	GO:0007017	GO:0005576
2.0_INSECT_GG3J73P03FGJX6	GO:0005576	GO:0008152	GO:0016747	GO:0009055	GO:0005515
2.0_INSECT_GG3J73P03FGJYH	GO:0009055	GO:0004872	GO:0005488	GO:0007155	GO:0007160	GO:0007229	GO:0008305	GO:0005515	GO:0051536	GO:0005576	GO:0008152	GO:0016747	GO:0016068	GO:0005525	GO:0005874	GO:0007017	GO:0006952
2.0_INSECT_GG3J73P03FGLSY	GO:0008152	GO:0016747	GO:0009055	GO:0005515	GO:0051536	GO:0005576	GO:0006952	GO:0009755	GO:0016068	GO:0004872	GO:0005488	GO:0007155	GO:0007160	GO:0007229	GO:0008305	GO:0009405	GO:0005199	GO:0009277	GO:0004222	GO:0008270
2.0_INSECT_GG3J73P03FGM9X	GO:0009055	GO:0005515	GO:0051536	GO:0004872	GO:0005488	GO:0007155	GO:0007160	GO:0007229	GO:0008305	GO:0005576	GO:0008152	GO:0016747	GO:0009405
2.0_INSECT_GG3J73P03FGMAB	GO:0008152	GO:0016747	GO:0009055	GO:0005576	GO:0005515	GO:0004872	GO:0005488	GO:0007155	GO:0007160	GO:0007229	GO:0008305	GO:0051536	GO:0006952
2.0_INSECT_GG3J73P03FGMYE	GO:0009055	GO:0051536	GO:0005515	GO:0008152	GO:0016747	GO:0005576	GO:0005525	GO:0005874	GO:0007017
2.0_INSECT_GG3J73P03FGO6Y	GO:0009055	GO:0051536	GO:0005576	GO:0006952	GO:0005515	GO:0008152	GO:0016747	GO:0004872	GO:0005488	GO:0007155	GO:0007160	GO:0007229	GO:0008305	GO:0005525	GO:0005874	GO:0007017
2.0_INSECT_GG3J73P03FGOM1	GO:0009055	GO:0005576	GO:0005515
2.0_INSECT_GG3J73P03FGOUZ	GO:0009055	GO:0051536	GO:0004872	GO:0005488	GO:0007155	GO:0007160	GO:0007229	GO:0008305	GO:0005576	GO:0006952	GO:0005515	GO:0008152	GO:0016747	GO:0005525	GO:0005874	GO:0007017
2.0_INSECT_GG3J73P03FGPD8	GO:0008152	GO:0016747	GO:0005515	GO:0009055	GO:0051536	GO:0004872	GO:0005488	GO:0007155	GO:0007160	GO:0007229	GO:0008305	GO:0005576	GO:0006952	GO:0005525	GO:0005874	GO:0007017	GO:0005199	GO:0009277
2.0_INSECT_GG3J73P03FGPNU	GO:0009055	GO:0051536	GO:0005576	GO:0005515	GO:0008152	GO:0016747	GO:0006952	GO:0004872	GO:0005488	GO:0007155	GO:0007160	GO:0007229	GO:0008305	GO:0005525	GO:0005874	GO:0007017	GO:0005199	GO:0009277
2.0_INSECT_GG3J73P03FGQR0	GO:0008152	GO:0016747	GO:0009055	GO:0051536	GO:0005515	GO:0016068	GO:0005576	GO:0004872	GO:0005488	GO:0007155	GO:0007160	GO:0007229	GO:0008305	GO:0006952
2.0_INSECT_GG3J73P03FGRKL	GO:0009055	GO:0051536
2.0_INSECT_GG3J73P03FGS2N	GO:0005576	GO:0009055	GO:0005515	GO:0051536	GO:0008152	GO:0016747	GO:0006952	GO:0005199	GO:0009277	GO:0005525	GO:0005874	GO:0007017
2.0_INSECT_GG3J73P03FGSJ2	GO:0009055	GO:0005576	GO:0005515	GO:0051536	GO:0004872	GO:0005488	GO:0007155	GO:0007160	GO:0007229	GO:0008305	GO:0016068	GO:0005525	GO:0005874	GO:0007017	GO:0008152	GO:0016747	GO:0006952
2.0_INSECT_GG3J73P03FGT3C	GO:0008152	GO:0016747	GO:0005525	GO:0005874	GO:0007017	GO:0009055	GO:0051536	GO:0005515	GO:0004872	GO:0005488	GO:0007155	GO:0007160	GO:0007229	GO:0008305	GO:0005576	GO:0006952
2.0_INSECT_GG3J73P03FGTHJ	GO:0005525	GO:0005874	GO:0007017	GO:0009055	GO:0005515	GO:0005576	GO:0006952	GO:0008152	GO:0016747	GO:0004872	GO:0005488	GO:0007155	GO:0007160	GO:0007229	GO:0008305	GO:0051536
2.0_INSECT_GG3J73P03FGTJF	GO:0009055
2.0_INSECT_GG3J73P03FGTL7	GO:0009055	GO:0051536	GO:0005576	GO:0005515	GO:0008152	GO:0016747	GO:0046872
2.0_INSECT_GG3J73P03FGTUU	GO:0008152	GO:0016747	GO:0009055	GO:0051536	GO:0005576	GO:0006952	GO:0005515	GO:0005525	GO:0005874	GO:0007017	GO:0004872	GO:0005488	GO:0007155	GO:0007160	GO:0007229	GO:0008305
2.0_INSECT_GG3J73P03FGULG	GO:0009055	GO:0051536	GO:0005576	GO:0005515	GO:0046872	GO:0008152	GO:0016747
2.0_INSECT_GG3J73P03FGUXM	GO:0008152	GO:0016747	GO:0009055	GO:0005576	GO:0006952	GO:0005515	GO:0051536	GO:0005525	GO:0005874	GO:0007017	GO:0004872	GO:0005488	GO:0007155	GO:0007160	GO:0007229	GO:0008305	GO:0016068
2.0_INSECT_GG3J73P03FGV8Z	GO:0009055	GO:0051536	GO:0005576	GO:0005515	GO:0008152	GO:0016747	GO:0005525	GO:0005874	GO:0007017	GO:0042309	GO:0050825	GO:0050826	GO:0004872	GO:0005488	GO:0007155	GO:0007160	GO:0007229	GO:0008305
2.0_INSECT_GG3J73P03FGVMG	GO:0009055	GO:0008152	GO:0016747	GO:0051536	GO:0005576	GO:0005515	GO:0004872	GO:0005488	GO:0007155	GO:0007160	GO:0007229	GO:0008305	GO:0005525	GO:0005874	GO:0007017	GO:0006952
2.0_INSECT_GG3J73P03FGVND	GO:0009055	GO:0005515	GO:0005576	GO:0006952	GO:0051536
2.0_INSECT_GG3J73P03FGWQ9	GO:0009055	GO:0051536	GO:0005515	GO:0005576
2.0_INSECT_GG3J73P03FGX99	GO:0009055	GO:0005515	GO:0008152	GO:0016747
2.0_INSECT_GG3J73P03FGXS2	GO:0009055	GO:0005576	GO:0006952	GO:0005515	GO:0008152	GO:0016747
2.0_INSECT_GG3J73P03FGYCP	GO:0005576	GO:0005515
2.0_INSECT_GG3J73P03FGZ45	GO:0008152	GO:0016747	GO:0009055	GO:0005576	GO:0005515	GO:0051536	GO:0004872	GO:0005488	GO:0007155	GO:0007160	GO:0007229	GO:0008305	GO:0006952
2.0_INSECT_GG3J73P03FGZ6W	GO:0009055
2.0_INSECT_GG3J73P03FGZAV	GO:0008152	GO:0016747	GO:0005515	GO:0005525	GO:0005874	GO:0007017	GO:0009055	GO:0051536
2.0_INSECT_GG3J73P03FGZJM	GO:0009055	GO:0005515	GO:0005576	GO:0008152	GO:0016747	GO:0051536	GO:0004872	GO:0005488	GO:0007155	GO:0007160	GO:0007229	GO:0008305
2.0_INSECT_GG3J73P03FGZQN	GO:0005576	GO:0005515	GO:0009055	GO:0008152	GO:0016747	GO:0006952	GO:0005525	GO:0005874	GO:0007017	GO:0051536
2.0_INSECT_GG3J73P03FGZU6	GO:0008152	GO:0016747
2.0_INSECT_GG3J73P03FH01T	GO:0005576	GO:0006952	GO:0005515	GO:0009055	GO:0042309	GO:0050825	GO:0050826	GO:0004872	GO:0005488	GO:0007155	GO:0007160	GO:0007229	GO:0008305	GO:0005525	GO:0005874	GO:0007017	GO:0005199	GO:0009277	GO:0008152	GO:0016747
2.0_INSECT_GG3J73P03FH098	GO:0005515	GO:0008152	GO:0016747	GO:0009055	GO:0051536	GO:0005525	GO:0005874	GO:0007017	GO:0005576	GO:0006952	GO:0004872	GO:0005488	GO:0007155	GO:0007160	GO:0007229	GO:0008305
2.0_INSECT_GG3J73P03FH0SQ	GO:0009055	GO:0008152	GO:0016747	GO:0005576	GO:0005515	GO:0051536	GO:0046872	GO:0016068
2.0_INSECT_GG3J73P03FH1GI	GO:0009055	GO:0005576	GO:0005515	GO:0006952	GO:0008152	GO:0016747	GO:0051536	GO:0005525	GO:0005874	GO:0007017
2.0_INSECT_GG3J73P03FH202	GO:0005525	GO:0005874	GO:0007017	GO:0005515	GO:0009055	GO:0008152	GO:0016747	GO:0005576	GO:0051536	GO:0004872	GO:0005488	GO:0007155	GO:0007160	GO:0007229	GO:0008305	GO:0006952
2.0_INSECT_GG3J73P03FH2VH	GO:0008152	GO:0016747	GO:0005576	GO:0005515	GO:0009055	GO:0051536	GO:0004872	GO:0005488	GO:0007155	GO:0007160	GO:0007229	GO:0008305
2.0_INSECT_GG3J73P03FH37X	GO:0008152	GO:0016747	GO:0009055	GO:0051536	GO:0004872	GO:0005488	GO:0007155	GO:0007160	GO:0007229	GO:0008305	GO:0005576	GO:0005515	GO:0005525	GO:0005874	GO:0007017	GO:0006952	GO:0009755
2.0_INSECT_GG3J73P03FH38Z	GO:0009055	GO:0005515
2.0_INSECT_GG3J73P03FH4RP	GO:0005515
2.0_INSECT_GG3J73P03FH4S7	GO:0005515	GO:0009055	GO:0051536
2.0_INSECT_GG3J73P03FH4VG	GO:0008152	GO:0016747	GO:0009055	GO:0005576	GO:0006952	GO:0005515	GO:0051536	GO:0005525	GO:0005874	GO:0007017	GO:0004872	GO:0005488	GO:0007155	GO:0007160	GO:0007229	GO:0008305
2.0_INSECT_GG3J73P03FH54A	GO:0009055	GO:0005515	GO:0051536	GO:0005525	GO:0005874	GO:0007017	GO:0008152	GO:0016747	GO:0005576	GO:0042309	GO:0050825	GO:0050826	GO:0006952
2.0_INSECT_GG3J73P03FH674	GO:0009055	GO:0051536	GO:0005515
2.0_INSECT_GG3J73P03FH6CT	GO:0009055	GO:0005576	GO:0005515	GO:0008152	GO:0016747	GO:0051536	GO:0004872	GO:0005488	GO:0007155	GO:0007160	GO:0007229	GO:0008305	GO:0005525	GO:0005874	GO:0007017	GO:0009755
2.0_INSECT_GG3J73P03FH6SE	GO:0008152	GO:0016747	GO:0009055	GO:0005576	GO:0005515
2.0_INSECT_GG3J73P03FHA3M	GO:0008152	GO:0016747
2.0_INSECT_GG3J73P03FHAET	GO:0005515	GO:0009055	GO:0004872	GO:0005488	GO:0007155	GO:0007160	GO:0007229	GO:0008305	GO:0005576	GO:0008152	GO:0016747	GO:0051536	GO:0006952	GO:0005525	GO:0005874	GO:0007017
2.0_INSECT_GG3J73P03FHAFJ	GO:0008152	GO:0016747	GO:0009055	GO:0005576	GO:0005515	GO:0051536	GO:0004872	GO:0005488	GO:0007155	GO:0007160	GO:0007229	GO:0008305	GO:0009755	GO:0005525	GO:0005874	GO:0007017
2.0_INSECT_GG3J73P03FHAIO	GO:0008152	GO:0016747	GO:0005515	GO:0009055	GO:0005576	GO:0051536	GO:0004872	GO:0005488	GO:0007155	GO:0007160	GO:0007229	GO:0008305	GO:0005525	GO:0005874	GO:0007017	GO:0006952	GO:0046872
2.0_INSECT_GG3J73P03FHB35	GO:0009055	GO:0008152	GO:0016747
2.0_INSECT_GG3J73P03FHBSI	GO:0009055	GO:0005515	GO:0008152	GO:0016747	GO:0051536	GO:0005576	GO:0016068	GO:0004872	GO:0005488	GO:0007155	GO:0007160	GO:0007229	GO:0008305	GO:0005525	GO:0005874	GO:0007017
2.0_INSECT_GG3J73P03FHCKX	GO:0005515	GO:0009055	GO:0005576	GO:0051536	GO:0005525	GO:0005874	GO:0007017	GO:0004872	GO:0005488	GO:0007155	GO:0007160	GO:0007229	GO:0008305	GO:0008152	GO:0016747
2.0_INSECT_GG3J73P03FHD2D	GO:0009055	GO:0051536	GO:0005515	GO:0005525	GO:0005874	GO:0007017	GO:0005576
2.0_INSECT_GG3J73P03FHD2K	GO:0009055	GO:0008152	GO:0016747	GO:0005515	GO:0004872	GO:0005488	GO:0007155	GO:0007160	GO:0007229	GO:0008305	GO:0005576	GO:0051536	GO:0006952	GO:0005525	GO:0005874	GO:0007017	GO:0005199	GO:0009277	GO:0004222	GO:0008270
2.0_INSECT_GG3J73P03FHD8F	GO:0009055	GO:0051536	GO:0005576	GO:0005515	GO:0008152	GO:0016747	GO:0004872	GO:0005488	GO:0007155	GO:0007160	GO:0007229	GO:0008305	GO:0006952	GO:0009755
2.0_INSECT_GG3J73P03FHDNJ	GO:0005515
2.0_INSECT_GG3J73P03FHENV	GO:0009055	GO:0005576	GO:0005515	GO:0006952	GO:0051536	GO:0009755	GO:0005525	GO:0005874	GO:0007017	GO:0004872	GO:0005488	GO:0007155	GO:0007160	GO:0007229	GO:0008305	GO:0008152	GO:0016747
2.0_INSECT_GG3J73P03FHF0K	GO:0005525	GO:0005874	GO:0007017	GO:0005515	GO:0009055	GO:0005576
2.0_INSECT_GG3J73P03FHFJQ	GO:0009055	GO:0008152	GO:0016747	GO:0005576	GO:0005515	GO:0051536	GO:0016068	GO:0004872	GO:0005488	GO:0007155	GO:0007160	GO:0007229	GO:0008305	GO:0009755	GO:0005525	GO:0005874	GO:0007017	GO:0006952
2.0_INSECT_GG3J73P03FHFLB	GO:0008152	GO:0016747	GO:0009055	GO:0005515	GO:0004872	GO:0005488	GO:0007155	GO:0007160	GO:0007229	GO:0008305	GO:0005576	GO:0046872	GO:0006952	GO:0005525	GO:0005874	GO:0007017	GO:0051536	GO:0009405
2.0_INSECT_GG3J73P03FHG24	GO:0009055	GO:0005576	GO:0005515	GO:0051536
2.0_INSECT_GG3J73P03FHHHD	GO:0008152	GO:0016747	GO:0009055	GO:0051536	GO:0005515	GO:0005576	GO:0006952	GO:0009755	GO:0005525	GO:0005874	GO:0007017	GO:0005199	GO:0009277	GO:0046872
2.0_INSECT_GG3J73P03FHING	GO:0009055	GO:0005576	GO:0051536	GO:0004872	GO:0005488	GO:0007155	GO:0007160	GO:0007229	GO:0008305	GO:0005515	GO:0008152	GO:0016747	GO:0006952
2.0_INSECT_GG3J73P03FHJAK	GO:0005576	GO:0009055	GO:0005515
2.0_INSECT_GG3J73P03FHKH2	GO:0009055	GO:0005525	GO:0005874	GO:0007017	GO:0005576
2.0_INSECT_GG3J73P03FHLV4	GO:0008152	GO:0016747	GO:0009055	GO:0051536	GO:0005576	GO:0006952	GO:0005515	GO:0005525	GO:0005874	GO:0007017	GO:0005199	GO:0009277	GO:0004872	GO:0005488	GO:0007155	GO:0007160	GO:0007229	GO:0008305
2.0_INSECT_GG3J73P03FHM5I	GO:0008152	GO:0016747	GO:0009055	GO:0005515	GO:0005576	GO:0006952	GO:0051536	GO:0005525	GO:0005874	GO:0007017	GO:0016068	GO:0004872	GO:0005488	GO:0007155	GO:0007160	GO:0007229	GO:0008305
2.0_INSECT_GG3J73P03FHMDP	GO:0009055	GO:0008152	GO:0016747	GO:0005515	GO:0051536	GO:0005576	GO:0004872	GO:0005488	GO:0007155	GO:0007160	GO:0007229	GO:0008305	GO:0016068	GO:0005525	GO:0005874	GO:0007017	GO:0006952
2.0_INSECT_GG3J73P03FHNBA	GO:0008152	GO:0016747	GO:0009055
2.0_INSECT_GG3J73P03FHNN8	GO:0005515	GO:0009055	GO:0051536	GO:0005576	GO:0005525	GO:0005874	GO:0007017	GO:0008152	GO:0016747	GO:0006952	GO:0004872	GO:0005488	GO:0007155	GO:0007160	GO:0007229	GO:0008305
2.0_INSECT_GG3J73P03FHNP0	GO:0005515	GO:0008152	GO:0016747	GO:0009055	GO:0005576
2.0_INSECT_GG3J73P03FHO11	GO:0008152	GO:0016747	GO:0005525	GO:0005874	GO:0007017	GO:0005515	GO:0009055	GO:0004872	GO:0005488	GO:0007155	GO:0007160	GO:0007229	GO:0008305	GO:0005576	GO:0006952	GO:0051536	GO:0005199	GO:0009277
2.0_INSECT_GG3J73P03FHOBQ	GO:0009055	GO:0008152	GO:0016747	GO:0005525	GO:0005874	GO:0007017	GO:0016068	GO:0005576	GO:0005515	GO:0004872	GO:0005488	GO:0007155	GO:0007160	GO:0007229	GO:0008305	GO:0006952
2.0_INSECT_GG3J73P03FHOVA	GO:0008152	GO:0016747	GO:0009055	GO:0051536	GO:0005576	GO:0005515
2.0_INSECT_GG3J73P03FHP8Q	GO:0009055	GO:0051536
2.0_INSECT_GG3J73P03FHPB4	GO:0008152	GO:0016747	GO:0009055	GO:0005576	GO:0005525	GO:0005874	GO:0007017	GO:0005515	GO:0016068	GO:0051536	GO:0006952	GO:0004872	GO:0005488	GO:0007155	GO:0007160	GO:0007229	GO:0008305
2.0_INSECT_GG3J73P03FHPIJ	GO:0008152	GO:0016747	GO:0009055	GO:0005515	GO:0005576	GO:0009755	GO:0051536	GO:0004872	GO:0005488	GO:0007155	GO:0007160	GO:0007229	GO:0008305
2.0_INSECT_GG3J73P03FHPLE	GO:0009055	GO:0005576	GO:0006952	GO:0005515	GO:0008152	GO:0016747
2.0_INSECT_GG3J73P03FHPO0	GO:0005515
2.0_INSECT_GG3J73P03FHPPZ	GO:0008152	GO:0016747	GO:0009055	GO:0005576	GO:0006952	GO:0005515
2.0_INSECT_GG3J73P03FHQ21	GO:0009055	GO:0051536	GO:0004872	GO:0005488	GO:0007155	GO:0007160	GO:0007229	GO:0008305	GO:0005576	GO:0005515	GO:0006952	GO:0008152	GO:0016747
2.0_INSECT_GG3J73P03FHQF7	GO:0009055	GO:0005525	GO:0005874	GO:0007017	GO:0005515
2.0_INSECT_GG3J73P03FHQV7	GO:0009055	GO:0005515
2.0_INSECT_GG3J73P03FHQYP	GO:0008152	GO:0016747	GO:0009055	GO:0005576	GO:0005515	GO:0051536	GO:0006952
2.0_INSECT_GG3J73P03FHR1V	GO:0009055	GO:0005525	GO:0005874	GO:0007017	GO:0005576	GO:0005515
2.0_INSECT_GG3J73P03FHSIY	GO:0009055	GO:0005576	GO:0005515	GO:0004872	GO:0005488	GO:0007155	GO:0007160	GO:0007229	GO:0008305	GO:0006952	GO:0008152	GO:0016747	GO:0051536	GO:0009755	GO:0005525	GO:0005874	GO:0007017
2.0_INSECT_GG3J73P03FHT5C	GO:0009055	GO:0051536	GO:0004872	GO:0005488	GO:0007155	GO:0007160	GO:0007229	GO:0008305	GO:0005515	GO:0008152	GO:0016747	GO:0005576	GO:0005525	GO:0005874	GO:0007017	GO:0005199	GO:0009277
2.0_INSECT_GG3J73P03FHTO1	GO:0009055	GO:0005576	GO:0006952	GO:0051536	GO:0005515	GO:0005525	GO:0005874	GO:0007017	GO:0004872	GO:0005488	GO:0007155	GO:0007160	GO:0007229	GO:0008305	GO:0008152	GO:0016747	GO:0042309	GO:0050825	GO:0050826	GO:0009755
2.0_INSECT_GG3J73P03FHTPV	GO:0009055	GO:0051536	GO:0005576	GO:0005515	GO:0008152	GO:0016747	GO:0004872	GO:0005488	GO:0007155	GO:0007160	GO:0007229	GO:0008305	GO:0005525	GO:0005874	GO:0007017	GO:0006952	GO:0005199	GO:0009277
2.0_INSECT_GG3J73P03FHTZA	GO:0005515	GO:0009055	GO:0005576	GO:0006952	GO:0004872	GO:0005488	GO:0007155	GO:0007160	GO:0007229	GO:0008305	GO:0051536	GO:0046872	GO:0005199	GO:0009277	GO:0016068	GO:0008152	GO:0016747	GO:0009755	GO:0005525	GO:0005874	GO:0007017	GO:0009405
2.0_INSECT_GG3J73P03FHU2Z	GO:0009055	GO:0005515	GO:0005525	GO:0005874	GO:0007017	GO:0008152	GO:0016747	GO:0051536	GO:0004872	GO:0005488	GO:0007155	GO:0007160	GO:0007229	GO:0008305	GO:0005576
2.0_INSECT_GG3J73P03FHU5Q	GO:0008152	GO:0016747	GO:0005525	GO:0005874	GO:0007017	GO:0009055	GO:0004872	GO:0005488	GO:0007155	GO:0007160	GO:0007229	GO:0008305	GO:0005576	GO:0005515	GO:0051536	GO:0006952
2.0_INSECT_GG3J73P03FHU5X	GO:0005515	GO:0008152	GO:0016747	GO:0009055	GO:0005525	GO:0005874	GO:0007017	GO:0005576	GO:0051536	GO:0006952	GO:0004872	GO:0005488	GO:0007155	GO:0007160	GO:0007229	GO:0008305
2.0_INSECT_GG3J73P03FHUA6	GO:0009055	GO:0005576	GO:0005515	GO:0008152	GO:0016747
2.0_INSECT_GG3J73P03FHUHP	GO:0009055
2.0_INSECT_GG3J73P03FHUI0	GO:0005576	GO:0005515	GO:0009055	GO:0004872	GO:0005488	GO:0007155	GO:0007160	GO:0007229	GO:0008305	GO:0008152	GO:0016747	GO:0051536	GO:0005525	GO:0005874	GO:0007017	GO:0006952
2.0_INSECT_GG3J73P03FHUU4	GO:0009055	GO:0008152	GO:0016747	GO:0005576	GO:0005515	GO:0051536	GO:0046872	GO:0004872	GO:0005488	GO:0007155	GO:0007160	GO:0007229	GO:0008305	GO:0005525	GO:0005874	GO:0007017
2.0_INSECT_GG3J73P03FHUYW	GO:0008152	GO:0016747	GO:0009055	GO:0005576
2.0_INSECT_GG3J73P03FHV05	GO:0009055	GO:0051536
2.0_INSECT_GG3J73P03FHV0K	GO:0009055	GO:0051536	GO:0005576	GO:0005515	GO:0008152	GO:0016747	GO:0004872	GO:0005488	GO:0007155	GO:0007160	GO:0007229	GO:0008305	GO:0005525	GO:0005874	GO:0007017
2.0_INSECT_GG3J73P03FHVHF	GO:0009055	GO:0051536	GO:0005515
2.0_INSECT_GG3J73P03FHW4B	GO:0005515	GO:0009055	GO:0005576	GO:0008152	GO:0016747	GO:0051536	GO:0006952	GO:0005525	GO:0005874	GO:0007017	GO:0004872	GO:0005488	GO:0007155	GO:0007160	GO:0007229	GO:0008305	GO:0005199	GO:0009277
2.0_INSECT_GG3J73P03FHW6Q	GO:0009055	GO:0051536	GO:0004872	GO:0005488	GO:0007155	GO:0007160	GO:0007229	GO:0008305	GO:0005576	GO:0005515	GO:0008152	GO:0016747	GO:0005525	GO:0005874	GO:0007017	GO:0001558	GO:0005520	GO:0006952
2.0_INSECT_GG3J73P03FHW7C	GO:0009055	GO:0008152	GO:0016747
2.0_INSECT_GG3J73P03FHWHA	GO:0008152	GO:0016747	GO:0009055	GO:0005515	GO:0005576	GO:0005525	GO:0005874	GO:0007017	GO:0051536	GO:0004872	GO:0005488	GO:0007155	GO:0007160	GO:0007229	GO:0008305
2.0_INSECT_GG3J73P03FHWN4	GO:0009055	GO:0005576	GO:0051536	GO:0005515	GO:0008152	GO:0016747	GO:0004872	GO:0005488	GO:0007155	GO:0007160	GO:0007229	GO:0008305	GO:0006952	GO:0009755
2.0_INSECT_GG3J73P03FHWR7	GO:0009055	GO:0005576	GO:0005515	GO:0005525	GO:0005874	GO:0007017	GO:0051536	GO:0008152	GO:0016747	GO:0006952
2.0_INSECT_GG3J73P03FHWV6	GO:0008152	GO:0016747	GO:0009055	GO:0051536	GO:0005576	GO:0006952	GO:0005515
2.0_INSECT_GG3J73P03FHX5E	GO:0009055	GO:0051536	GO:0005576	GO:0006952	GO:0005515
2.0_INSECT_GG3J73P03FHXCY	GO:0009055	GO:0008152	GO:0016747	GO:0005576	GO:0005515	GO:0006952	GO:0051536	GO:0042309	GO:0050825	GO:0050826	GO:0004872	GO:0005488	GO:0007155	GO:0007160	GO:0007229	GO:0008305
2.0_INSECT_GG3J73P03FHXGL	GO:0008152	GO:0016747	GO:0009055	GO:0005576	GO:0005515
2.0_INSECT_GG3J73P03FHXPI	GO:0009055	GO:0004872	GO:0005488	GO:0007155	GO:0007160	GO:0007229	GO:0008305	GO:0005576	GO:0006952	GO:0005515	GO:0008152	GO:0016747
2.0_INSECT_GG3J73P03FHYD1	GO:0008152	GO:0016747	GO:0009055	GO:0051536	GO:0005576	GO:0006952	GO:0005515	GO:0009755	GO:0005525	GO:0005874	GO:0007017	GO:0004872	GO:0005488	GO:0007155	GO:0007160	GO:0007229	GO:0008305	GO:0046872
2.0_INSECT_GG3J73P03FHYH5	GO:0008152	GO:0016747	GO:0005515	GO:0005576	GO:0009055	GO:0051536
2.0_INSECT_GG3J73P03FHYLF	GO:0009055
2.0_INSECT_GG3J73P03FHZND	GO:0008152	GO:0016747	GO:0005525	GO:0005874	GO:0007017	GO:0009055	GO:0005576	GO:0004872	GO:0005488	GO:0007155	GO:0007160	GO:0007229	GO:0008305	GO:0051536	GO:0005515	GO:0006952
2.0_INSECT_GG3J73P03FI0KK	GO:0009055	GO:0008152	GO:0016747	GO:0051536	GO:0005515
2.0_INSECT_GG3J73P03FI0M7	GO:0009055	GO:0005515
2.0_INSECT_GG3J73P03FI0UW	GO:0009055	GO:0005576	GO:0008152	GO:0016747	GO:0005515
2.0_INSECT_GG3J73P03FI29H	GO:0009055	GO:0005576	GO:0005515
2.0_INSECT_GG3J73P03FI2A1	GO:0008152	GO:0016747	GO:0009055	GO:0005515	GO:0004872	GO:0005488	GO:0007155	GO:0007160	GO:0007229	GO:0008305	GO:0005576	GO:0051536
2.0_INSECT_GG3J73P03FI3W3	GO:0009055	GO:0051536	GO:0008152	GO:0016747	GO:0005576	GO:0005515	GO:0005199	GO:0009277	GO:0005525	GO:0005874	GO:0007017	GO:0004872	GO:0005488	GO:0007155	GO:0007160	GO:0007229	GO:0008305	GO:0006952
2.0_INSECT_GG3J73P03FI46I	GO:0009055
2.0_INSECT_GG3J73P03FI4WD	GO:0009055	GO:0005576	GO:0008152	GO:0016747	GO:0005515	GO:0051536	GO:0005525	GO:0005874	GO:0007017	GO:0004872	GO:0005488	GO:0007155	GO:0007160	GO:0007229	GO:0008305	GO:0006952
2.0_INSECT_GG3J73P03FI5MC	GO:0008152	GO:0016747
2.0_INSECT_GG3J73P03FI5YA	GO:0009055	GO:0005576	GO:0005515	GO:0008152	GO:0016747	GO:0016068	GO:0006952	GO:0005525	GO:0005874	GO:0007017	GO:0051536
2.0_INSECT_GG3J73P03FI624	GO:0008152	GO:0016747	GO:0009055	GO:0051536	GO:0005576	GO:0005515	GO:0004872	GO:0005488	GO:0007155	GO:0007160	GO:0007229	GO:0008305	GO:0006952
2.0_INSECT_GG3J73P03FI6HB	GO:0009055	GO:0005576	GO:0005515	GO:0008152	GO:0016747	GO:0006952	GO:0016068	GO:0004872	GO:0005488	GO:0007155	GO:0007160	GO:0007229	GO:0008305	GO:0009755
2.0_INSECT_GG3J73P03FI6V3	GO:0009055	GO:0051536
2.0_INSECT_GG3J73P03FI6VJ	GO:0008152	GO:0016747	GO:0005576	GO:0009055	GO:0051536	GO:0005515	GO:0005525	GO:0005874	GO:0007017
2.0_INSECT_GG3J73P03FI77V	GO:0009055	GO:0005515
2.0_INSECT_GG3J73P03FI7AG	GO:0008152	GO:0016747	GO:0009055	GO:0005525	GO:0005874	GO:0007017	GO:0005515	GO:0005576	GO:0004872	GO:0005488	GO:0007155	GO:0007160	GO:0007229	GO:0008305	GO:0051536	GO:0016068	GO:0006952
2.0_INSECT_GG3J73P03FI7V4	GO:0008152	GO:0016747	GO:0009055	GO:0051536	GO:0005576	GO:0005515	GO:0016068	GO:0005525	GO:0005874	GO:0007017	GO:0046872	GO:0004872	GO:0005488	GO:0007155	GO:0007160	GO:0007229	GO:0008305	GO:0006952
2.0_INSECT_GG3J73P03FI87K	GO:0009055	GO:0005576	GO:0005515	GO:0004872	GO:0005488	GO:0007155	GO:0007160	GO:0007229	GO:0008305
2.0_INSECT_GG3J73P03FI8BP	GO:0008152	GO:0016747	GO:0004252	GO:0006508
2.0_INSECT_GG3J73P03FI8EL	GO:0046872	GO:0005576	GO:0006952	GO:0005515	GO:0008152	GO:0016747	GO:0009055	GO:0004872	GO:0005488	GO:0007155	GO:0007160	GO:0007229	GO:0008305	GO:0051536
2.0_INSECT_GG3J73P03FI9AJ	GO:0009055	GO:0008152	GO:0016747	GO:0004872	GO:0005488	GO:0007155	GO:0007160	GO:0007229	GO:0008305	GO:0005515	GO:0005576	GO:0051536	GO:0006952	GO:0005525	GO:0005874	GO:0007017
2.0_INSECT_GG3J73P03FIAMK	GO:0005576	GO:0005515	GO:0009055	GO:0004872	GO:0005488	GO:0007155	GO:0007160	GO:0007229	GO:0008305	GO:0008152	GO:0016747	GO:0051536	GO:0005525	GO:0005874	GO:0007017	GO:0006952	GO:0009755
2.0_INSECT_GG3J73P03FIB9O	GO:0009055	GO:0005515	GO:0004872	GO:0005488	GO:0007155	GO:0007160	GO:0007229	GO:0008305	GO:0005576	GO:0046872	GO:0008152	GO:0016747	GO:0051536	GO:0005525	GO:0005874	GO:0007017	GO:0006952
2.0_INSECT_GG3J73P03FICF4	GO:0008152	GO:0016747	GO:0009055
2.0_INSECT_GG3J73P03FID50	GO:0005515	GO:0009055	GO:0004872	GO:0005488	GO:0007155	GO:0007160	GO:0007229	GO:0008305	GO:0005576	GO:0016068	GO:0051536	GO:0008152	GO:0016747	GO:0006952
2.0_INSECT_GG3J73P03FID8M	GO:0009055	GO:0005576	GO:0009405
2.0_INSECT_GG3J73P03FID8Q	GO:0009055	GO:0005515	GO:0005525	GO:0005874	GO:0007017	GO:0005576	GO:0008152	GO:0016747	GO:0004872	GO:0005488	GO:0007155	GO:0007160	GO:0007229	GO:0008305	GO:0051536	GO:0006952	GO:0016068	GO:0004252	GO:0006508
2.0_INSECT_GG3J73P03FIDBT	GO:0009055	GO:0005515	GO:0016068	GO:0051536	GO:0004872	GO:0005488	GO:0007155	GO:0007160	GO:0007229	GO:0008305	GO:0005576	GO:0046872	GO:0008152	GO:0016747	GO:0005525	GO:0005874	GO:0007017	GO:0006952
2.0_INSECT_GG3J73P03FIEN6	GO:0008152	GO:0016747	GO:0005576	GO:0009055	GO:0051536	GO:0004872	GO:0005488	GO:0007155	GO:0007160	GO:0007229	GO:0008305	GO:0005515	GO:0006952
2.0_INSECT_GG3J73P03FIENL	GO:0009055	GO:0005515	GO:0005576	GO:0008152	GO:0016747	GO:0006952	GO:0004872	GO:0005488	GO:0007155	GO:0007160	GO:0007229	GO:0008305	GO:0005199	GO:0009277	GO:0005525	GO:0005874	GO:0007017
2.0_INSECT_GG3J73P03FIF40	GO:0008152	GO:0016747
2.0_INSECT_GG3J73P03FIF4D	GO:0005515	GO:0008152	GO:0016747	GO:0009055	GO:0051536	GO:0005525	GO:0005874	GO:0007017	GO:0005576	GO:0006952	GO:0004872	GO:0005488	GO:0007155	GO:0007160	GO:0007229	GO:0008305
2.0_INSECT_GG3J73P03FIFE6	GO:0046872
2.0_INSECT_GG3J73P03FIFSN	GO:0009055	GO:0051536	GO:0005515
2.0_INSECT_GG3J73P03FIGCA	GO:0005576	GO:0009055	GO:0005515
2.0_INSECT_GG3J73P03FIH43	GO:0009055	GO:0005515	GO:0008152	GO:0016747	GO:0051536	GO:0004872	GO:0005488	GO:0007155	GO:0007160	GO:0007229	GO:0008305	GO:0005576	GO:0006952
2.0_INSECT_GG3J73P03FIHHH	GO:0009055	GO:0051536	GO:0005515	GO:0005576
2.0_INSECT_GG3J73P03FIHR9	GO:0009055	GO:0051536	GO:0005576	GO:0006952	GO:0005515	GO:0008152	GO:0016747	GO:0005525	GO:0005874	GO:0007017	GO:0004872	GO:0005488	GO:0007155	GO:0007160	GO:0007229	GO:0008305
2.0_INSECT_GG3J73P03FIJQ5	GO:0008152	GO:0016747	GO:0005576	GO:0006952	GO:0005515
2.0_INSECT_GG3J73P03FIK57	GO:0008152	GO:0016747	GO:0009055	GO:0005515	GO:0004872	GO:0005488	GO:0007155	GO:0007160	GO:0007229	GO:0008305	GO:0051536	GO:0005576
2.0_INSECT_GG3J73P03FIKKK	GO:0009055	GO:0005576	GO:0008152	GO:0016747	GO:0005515	GO:0051536	GO:0005525	GO:0005874	GO:0007017	GO:0004872	GO:0005488	GO:0007155	GO:0007160	GO:0007229	GO:0008305	GO:0006952
2.0_INSECT_GG3J73P03FIKKO	GO:0009055	GO:0004872	GO:0005488	GO:0007155	GO:0007160	GO:0007229	GO:0008305	GO:0005576	GO:0005515	GO:0051536	GO:0009755	GO:0008152	GO:0016747	GO:0046872	GO:0005525	GO:0005874	GO:0007017
2.0_INSECT_GG3J73P03FIL07	GO:0005576	GO:0008152	GO:0016747	GO:0009055	GO:0005515	GO:0051536	GO:0042309	GO:0050825	GO:0050826	GO:0004872	GO:0005488	GO:0007155	GO:0007160	GO:0007229	GO:0008305	GO:0006952	GO:0016068
2.0_INSECT_GG3J73P03FIL3U	GO:0005576	GO:0005515	GO:0009055
2.0_INSECT_GG3J73P03FIL86	GO:0009055	GO:0051536	GO:0005515	GO:0004872	GO:0005488	GO:0007155	GO:0007160	GO:0007229	GO:0008305	GO:0005576	GO:0008152	GO:0016747
2.0_INSECT_GG3J73P03FIMDE	GO:0009055	GO:0051536	GO:0005576	GO:0006952
2.0_INSECT_GG3J73P03FIMGW	GO:0009055
2.0_INSECT_GG3J73P03FIMIK	GO:0009055	GO:0004872	GO:0005488	GO:0007155	GO:0007160	GO:0007229	GO:0008305	GO:0005576	GO:0006952	GO:0005515	GO:0009755	GO:0008152	GO:0016747	GO:0051536
2.0_INSECT_GG3J73P03FIMO4	GO:0009055	GO:0008152	GO:0016747	GO:0005576	GO:0005515	GO:0004872	GO:0005488	GO:0007155	GO:0007160	GO:0007229	GO:0008305	GO:0051536	GO:0006952	GO:0016068	GO:0042309	GO:0050825	GO:0050826
2.0_INSECT_GG3J73P03FIMRB	GO:0009055	GO:0005576	GO:0008152	GO:0016747	GO:0051536	GO:0005525	GO:0005874	GO:0007017	GO:0005515	GO:0006952	GO:0009755	GO:0004872	GO:0005488	GO:0007155	GO:0007160	GO:0007229	GO:0008305
2.0_INSECT_GG3J73P03FIN5H	GO:0008152	GO:0016747	GO:0009055	GO:0005576	GO:0006952	GO:0005515	GO:0004872	GO:0005488	GO:0007155	GO:0007160	GO:0007229	GO:0008305	GO:0051536	GO:0005525	GO:0005874	GO:0007017
2.0_INSECT_GG3J73P03FIN7S	GO:0005515	GO:0009055	GO:0005576	GO:0008152	GO:0016747	GO:0051536	GO:0005525	GO:0005874	GO:0007017	GO:0046872	GO:0006952
2.0_INSECT_GG3J73P03FINAN	GO:0009055	GO:0051536	GO:0005576	GO:0005515	GO:0006952	GO:0008152	GO:0016747	GO:0004872	GO:0005488	GO:0007155	GO:0007160	GO:0007229	GO:0008305	GO:0046872
2.0_INSECT_GG3J73P03FINN3	GO:0009055	GO:0005515	GO:0008152	GO:0016747	GO:0016068	GO:0005576	GO:0051536	GO:0005525	GO:0005874	GO:0007017
2.0_INSECT_GG3J73P03FIOAG	GO:0005525	GO:0005874	GO:0007017	GO:0005576	GO:0005515
2.0_INSECT_GG3J73P03FIOD4	GO:0008152	GO:0016747	GO:0009055	GO:0005576	GO:0006952	GO:0005515	GO:0051536	GO:0016068	GO:0046872	GO:0004252	GO:0006508
2.0_INSECT_GG3J73P03FIOX4	GO:0005576	GO:0008152	GO:0016747	GO:0009055	GO:0005515	GO:0016068	GO:0005199	GO:0009277	GO:0051536
2.0_INSECT_GG3J73P03FIPPG	GO:0009055	GO:0005576	GO:0005515	GO:0008152	GO:0016747	GO:0006952	GO:0051536	GO:0004872	GO:0005488	GO:0007155	GO:0007160	GO:0007229	GO:0008305
2.0_INSECT_GG3J73P03FIQ7L	GO:0005515	GO:0009055	GO:0051536	GO:0004872	GO:0005488	GO:0007155	GO:0007160	GO:0007229	GO:0008305	GO:0005576	GO:0006952	GO:0008152	GO:0016747	GO:0016068
2.0_INSECT_GG3J73P03FIQHT	GO:0009055	GO:0005515	GO:0008152	GO:0016747
2.0_INSECT_GG3J73P03FIQMA	GO:0005515
2.0_INSECT_GG3J73P03FISG9	GO:0009055	GO:0005515	GO:0005525	GO:0005874	GO:0007017	GO:0008152	GO:0016747	GO:0005576	GO:0006952	GO:0051536
2.0_INSECT_GG3J73P03FIT7N	GO:0009055	GO:0004872	GO:0005488	GO:0007155	GO:0007160	GO:0007229	GO:0008305	GO:0005515
2.0_INSECT_GG3J73P03FIT8G	GO:0009055
2.0_INSECT_GG3J73P03FITVW	GO:0005576
2.0_INSECT_GG3J73P03FITWM	GO:0009055	GO:0051536	GO:0008152	GO:0016747	GO:0005576	GO:0005515
2.0_INSECT_GG3J73P03FIU9O	GO:0009055	GO:0005515	GO:0005525	GO:0005874	GO:0007017	GO:0005576	GO:0008152	GO:0016747	GO:0051536	GO:0004872	GO:0005488	GO:0007155	GO:0007160	GO:0007229	GO:0008305	GO:0006952
2.0_INSECT_GG3J73P03FIUJU	GO:0005515	GO:0009055	GO:0005576	GO:0051536	GO:0005525	GO:0005874	GO:0007017	GO:0008152	GO:0016747	GO:0004872	GO:0005488	GO:0007155	GO:0007160	GO:0007229	GO:0008305	GO:0001558	GO:0005520	GO:0006952
2.0_INSECT_GG3J73P03FIUK2	GO:0009055	GO:0005515	GO:0005525	GO:0005874	GO:0007017	GO:0005576
2.0_INSECT_GG3J73P03FIUQ9	GO:0005515	GO:0009055	GO:0005576	GO:0006952	GO:0051536	GO:0008152	GO:0016747	GO:0005525	GO:0005874	GO:0007017	GO:0004872	GO:0005488	GO:0007155	GO:0007160	GO:0007229	GO:0008305
2.0_INSECT_GG3J73P03FIWFU	GO:0009055	GO:0004872	GO:0005488	GO:0007155	GO:0007160	GO:0007229	GO:0008305	GO:0008152	GO:0016747	GO:0005576	GO:0006952	GO:0005515	GO:0005199	GO:0009277	GO:0016068
2.0_INSECT_GG3J73P03FIXJC	GO:0008152	GO:0016747	GO:0009055	GO:0051536	GO:0005525	GO:0005874	GO:0007017	GO:0005576	GO:0005515
2.0_INSECT_GG3J73P03FIXRH	GO:0009055	GO:0016068	GO:0005515	GO:0005576	GO:0006952	GO:0008152	GO:0016747	GO:0005199	GO:0009277
2.0_INSECT_GG3J73P03FIY2E	GO:0009055	GO:0008152	GO:0016747	GO:0005576
2.0_INSECT_GG3J73P03FIY4R	GO:0008152	GO:0016747	GO:0009055	GO:0005576	GO:0005515	GO:0005525	GO:0005874	GO:0007017	GO:0005199	GO:0009277	GO:0051536	GO:0006952
2.0_INSECT_GG3J73P03FIY5D	GO:0009055	GO:0005515	GO:0008152	GO:0016747	GO:0051536	GO:0005576	GO:0016068	GO:0005525	GO:0005874	GO:0007017	GO:0005199	GO:0009277
2.0_INSECT_GG3J73P03FIY5Z	GO:0009055	GO:0051536	GO:0005576	GO:0005515
2.0_INSECT_GG3J73P03FIY73	GO:0009055	GO:0005576	GO:0004872	GO:0005488	GO:0007155	GO:0007160	GO:0007229	GO:0008305	GO:0006952	GO:0005515	GO:0008152	GO:0016747	GO:0051536
2.0_INSECT_GG3J73P03FIYK6	GO:0009055	GO:0051536	GO:0005576	GO:0005515	GO:0008152	GO:0016747	GO:0006952	GO:0005525	GO:0005874	GO:0007017	GO:0009405	GO:0004872	GO:0005488	GO:0007155	GO:0007160	GO:0007229	GO:0008305
2.0_INSECT_GG3J73P03FIZ53	GO:0008152	GO:0016747	GO:0005515
2.0_INSECT_GG3J73P03FJ0DL	GO:0009055	GO:0005576	GO:0005515	GO:0006952	GO:0051536	GO:0005525	GO:0005874	GO:0007017	GO:0008152	GO:0016747	GO:0004872	GO:0005488	GO:0007155	GO:0007160	GO:0007229	GO:0008305	GO:0009405
2.0_INSECT_GG3J73P03FJ0KW	GO:0005515
2.0_INSECT_GG3J73P03FJ0L0	GO:0008152	GO:0016747	GO:0005525	GO:0005874	GO:0007017	GO:0005576	GO:0009055	GO:0005515	GO:0051536
2.0_INSECT_GG3J73P03FJ0PU	GO:0009055	GO:0008152	GO:0016747	GO:0005515	GO:0005576	GO:0006952	GO:0051536	GO:0004872	GO:0005488	GO:0007155	GO:0007160	GO:0007229	GO:0008305	GO:0046872
2.0_INSECT_GG3J73P03FJ0SK	GO:0009055	GO:0008152	GO:0016747	GO:0005576	GO:0005515	GO:0051536
2.0_INSECT_GG3J73P03FJ0T9	GO:0009055	GO:0051536	GO:0005515	GO:0008152	GO:0016747	GO:0005576	GO:0005044	GO:0016020
2.0_INSECT_GG3J73P03FJ0XQ	GO:0005525	GO:0005874	GO:0007017	GO:0005515
2.0_INSECT_GG3J73P03FJ1I1	GO:0009055	GO:0008152	GO:0016747	GO:0005515	GO:0051536	GO:0004872	GO:0005488	GO:0007155	GO:0007160	GO:0007229	GO:0008305	GO:0005576	GO:0006952
2.0_INSECT_GG3J73P03FJ1R9	GO:0009055	GO:0005515	GO:0051536	GO:0046872	GO:0004872	GO:0005488	GO:0007155	GO:0007160	GO:0007229	GO:0008305	GO:0005576	GO:0005525	GO:0005874	GO:0007017	GO:0006952	GO:0008152	GO:0016747
2.0_INSECT_GG3J73P03FJ1VK	GO:0005515	GO:0004872	GO:0005488	GO:0007155	GO:0007160	GO:0007229	GO:0008305
2.0_INSECT_GG3J73P03FJ1W8	GO:0009055	GO:0005515
2.0_INSECT_GG3J73P03FJ2E7	GO:0009055
2.0_INSECT_GG3J73P03FJ2G1	GO:0009055	GO:0005576
2.0_INSECT_GG3J73P03FJ2KP	GO:0009055	GO:0051536	GO:0004872	GO:0005488	GO:0007155	GO:0007160	GO:0007229	GO:0008305	GO:0005576	GO:0005515	GO:0005525	GO:0005874	GO:0007017	GO:0006952
2.0_INSECT_GG3J73P03FJ2L5	GO:0009055	GO:0008152	GO:0016747
2.0_INSECT_GG3J73P03FJ30B	GO:0009055	GO:0005576	GO:0005515	GO:0004872	GO:0005488	GO:0007155	GO:0007160	GO:0007229	GO:0008305	GO:0008152	GO:0016747	GO:0051536	GO:0005525	GO:0005874	GO:0007017	GO:0006952
2.0_INSECT_GG3J73P03FJ3TF	GO:0009055	GO:0005515	GO:0005576	GO:0006952	GO:0008152	GO:0016747
2.0_INSECT_GG3J73P03FJ4JF	GO:0009055	GO:0005515	GO:0008152	GO:0016747
2.0_INSECT_GG3J73P03FJ5TN	GO:0009055	GO:0005576	GO:0005515	GO:0008152	GO:0016747	GO:0004872	GO:0005488	GO:0007155	GO:0007160	GO:0007229	GO:0008305	GO:0051536	GO:0006952
2.0_INSECT_GG3J73P03FJ6T6	GO:0016068	GO:0008152	GO:0016747	GO:0009055	GO:0051536	GO:0005576	GO:0005515	GO:0006952	GO:0004872	GO:0005488	GO:0007155	GO:0007160	GO:0007229	GO:0008305
2.0_INSECT_GG3J73P03FJ6XC	GO:0009055	GO:0016068	GO:0008152	GO:0016747	GO:0005576	GO:0005515	GO:0051536	GO:0004872	GO:0005488	GO:0007155	GO:0007160	GO:0007229	GO:0008305	GO:0006952
2.0_INSECT_GG3J73P03FJ6XG	GO:0009055	GO:0051536	GO:0005576	GO:0006952	GO:0005515
2.0_INSECT_GG3J73P03FJ76L	GO:0005515	GO:0009055	GO:0051536
2.0_INSECT_GG3J73P03FJ8JI	GO:0009055	GO:0005525	GO:0005874	GO:0007017	GO:0005576	GO:0005515	GO:0008152	GO:0016747	GO:0051536	GO:0004872	GO:0005488	GO:0007155	GO:0007160	GO:0007229	GO:0008305
2.0_INSECT_GG3J73P03FJ9VT	GO:0009055	GO:0051536
2.0_INSECT_GG3J73P03FJALQ	GO:0005515	GO:0009055	GO:0051536	GO:0005576	GO:0008152	GO:0016747
2.0_INSECT_GG3J73P03FJBF1	GO:0005576	GO:0008152	GO:0016747	GO:0009055	GO:0004872	GO:0005488	GO:0007155	GO:0007160	GO:0007229	GO:0008305	GO:0005515	GO:0006952	GO:0005525	GO:0005874	GO:0007017	GO:0051536
2.0_INSECT_GG3J73P03FJBK6	GO:0009055	GO:0051536	GO:0005576	GO:0005515
2.0_INSECT_GG3J73P03FJBQJ	GO:0008152	GO:0016747	GO:0009055	GO:0051536	GO:0005515	GO:0005576	GO:0006952
2.0_INSECT_GG3J73P03FJBQQ	GO:0008152	GO:0016747
2.0_INSECT_GG3J73P03FJC37	GO:0009055	GO:0051536	GO:0005515	GO:0008152	GO:0016747	GO:0005576	GO:0005525	GO:0005874	GO:0007017
2.0_INSECT_GG3J73P03FJCBH	GO:0009055	GO:0051536	GO:0005576	GO:0005515
2.0_INSECT_GG3J73P03FJCRX	GO:0009055	GO:0005576	GO:0005515	GO:0008152	GO:0016747	GO:0006952	GO:0051536	GO:0004872	GO:0005488	GO:0007155	GO:0007160	GO:0007229	GO:0008305	GO:0005525	GO:0005874	GO:0007017
2.0_INSECT_GG3J73P03FJD68	GO:0009055	GO:0005515	GO:0005576	GO:0008152	GO:0016747	GO:0051536	GO:0006952	GO:0005525	GO:0005874	GO:0007017	GO:0004872	GO:0005488	GO:0007155	GO:0007160	GO:0007229	GO:0008305	GO:0005199	GO:0009277
2.0_INSECT_GG3J73P03FJE9Y	GO:0009055
2.0_INSECT_GG3J73P03FJELH	GO:0009055	GO:0051536	GO:0005515
2.0_INSECT_GG3J73P03FJEO5	GO:0008152	GO:0016747	GO:0009055
2.0_INSECT_GG3J73P03FJEX7	GO:0009055	GO:0051536	GO:0005576	GO:0006952	GO:0005515
2.0_INSECT_GG3J73P03FJFLJ	GO:0008152	GO:0016747	GO:0009055	GO:0051536
2.0_INSECT_GG3J73P03FJGNU	GO:0009055	GO:0005576	GO:0005515	GO:0008152	GO:0016747	GO:0051536	GO:0016068	GO:0006952
2.0_INSECT_GG3J73P03FJHD0	GO:0009055	GO:0008152	GO:0016747	GO:0005576	GO:0005515	GO:0006952	GO:0009405	GO:0009755	GO:0004872	GO:0005488	GO:0007155	GO:0007160	GO:0007229	GO:0008305	GO:0005525	GO:0005874	GO:0007017	GO:0051536
2.0_INSECT_GG3J73P03FJHU3	GO:0009055	GO:0004872	GO:0005488	GO:0007155	GO:0007160	GO:0007229	GO:0008305	GO:0005576	GO:0005515	GO:0008152	GO:0016747	GO:0016068	GO:0006952	GO:0051536	GO:0005525	GO:0005874	GO:0007017
2.0_INSECT_GG3J73P03FJHWM	GO:0009055	GO:0005576	GO:0005515	GO:0051536	GO:0008152	GO:0016747	GO:0005199	GO:0009277	GO:0005525	GO:0005874	GO:0007017	GO:0006952
2.0_INSECT_GG3J73P03FJI2Z	GO:0009055	GO:0005515	GO:0008152	GO:0016747	GO:0004872	GO:0005488	GO:0007155	GO:0007160	GO:0007229	GO:0008305	GO:0005576	GO:0046872	GO:0051536	GO:0005525	GO:0005874	GO:0007017
2.0_INSECT_GG3J73P03FJIM5	GO:0008152	GO:0016747	GO:0009055	GO:0051536	GO:0005576	GO:0006952	GO:0005515	GO:0004872	GO:0005488	GO:0007155	GO:0007160	GO:0007229	GO:0008305	GO:0005525	GO:0005874	GO:0007017
2.0_INSECT_GG3J73P03FJJET	GO:0009055	GO:0005576	GO:0005525	GO:0005874	GO:0007017	GO:0005515	GO:0051536	GO:0008152	GO:0016747	GO:0004872	GO:0005488	GO:0007155	GO:0007160	GO:0007229	GO:0008305
2.0_INSECT_GG3J73P03FJJOH	GO:0005576	GO:0009055	GO:0051536	GO:0004872	GO:0005488	GO:0007155	GO:0007160	GO:0007229	GO:0008305	GO:0006952	GO:0005515	GO:0008152	GO:0016747	GO:0005525	GO:0005874	GO:0007017
2.0_INSECT_GG3J73P03FJJUZ	GO:0008152	GO:0016747	GO:0009055	GO:0005515	GO:0004872	GO:0005488	GO:0007155	GO:0007160	GO:0007229	GO:0008305	GO:0005525	GO:0005874	GO:0007017	GO:0051536	GO:0005576	GO:0006952	GO:0016068
2.0_INSECT_GG3J73P03FJJYL	GO:0009055	GO:0005515	GO:0051536	GO:0004872	GO:0005488	GO:0007155	GO:0007160	GO:0007229	GO:0008305	GO:0005576	GO:0006952	GO:0008152	GO:0016747	GO:0005525	GO:0005874	GO:0007017	GO:0005199	GO:0009277
2.0_INSECT_GG3J73P03FJK7S	GO:0009055
2.0_INSECT_GG3J73P03FJKK0	GO:0008152	GO:0016747	GO:0005515	GO:0009055	GO:0051536	GO:0004872	GO:0005488	GO:0007155	GO:0007160	GO:0007229	GO:0008305	GO:0005576	GO:0006952
2.0_INSECT_GG3J73P03FJKXQ	GO:0009055	GO:0004872	GO:0005488	GO:0007155	GO:0007160	GO:0007229	GO:0008305	GO:0005576	GO:0006952	GO:0005515	GO:0046872	GO:0008152	GO:0016747
2.0_INSECT_GG3J73P03FJL46	GO:0009055	GO:0005576	GO:0006952	GO:0005515
2.0_INSECT_GG3J73P03FJLGM	GO:0008152	GO:0016747	GO:0005576	GO:0005515	GO:0009055	GO:0051536
2.0_INSECT_GG3J73P03FJLN1	GO:0009055	GO:0005525	GO:0005874	GO:0007017	GO:0005576	GO:0005515	GO:0051536	GO:0004872	GO:0005488	GO:0007155	GO:0007160	GO:0007229	GO:0008305	GO:0006952	GO:0008152	GO:0016747	GO:0046872
2.0_INSECT_GG3J73P03FJMKF	GO:0005515
2.0_INSECT_GG3J73P03FJMV7	GO:0009055	GO:0051536	GO:0005515	GO:0008152	GO:0016747	GO:0005525	GO:0005874	GO:0007017	GO:0005576	GO:0006952
2.0_INSECT_GG3J73P03FJNV6	GO:0009055	GO:0005525	GO:0005874	GO:0007017	GO:0005515	GO:0008152	GO:0016747	GO:0005576	GO:0006952	GO:0004872	GO:0005488	GO:0007155	GO:0007160	GO:0007229	GO:0008305	GO:0016068	GO:0005199	GO:0009277	GO:0046872	GO:0051536
2.0_INSECT_GG3J73P03FJOFL	GO:0005515	GO:0009055	GO:0005576	GO:0051536	GO:0008152	GO:0016747	GO:0004872	GO:0005488	GO:0007155	GO:0007160	GO:0007229	GO:0008305	GO:0005525	GO:0005874	GO:0007017
2.0_INSECT_GG3J73P03FJOQ1	GO:0008152	GO:0016747	GO:0005515	GO:0009055	GO:0005576
2.0_INSECT_GG3J73P03FJPF9	GO:0009055	GO:0051536	GO:0008152	GO:0016747	GO:0004872	GO:0005488	GO:0007155	GO:0007160	GO:0007229	GO:0008305	GO:0005515	GO:0005525	GO:0005874	GO:0007017	GO:0005576	GO:0006952	GO:0009755
2.0_INSECT_GG3J73P03FJPX0	GO:0009055	GO:0051536	GO:0008152	GO:0016747	GO:0004872	GO:0005488	GO:0007155	GO:0007160	GO:0007229	GO:0008305	GO:0005515	GO:0005525	GO:0005874	GO:0007017	GO:0005576	GO:0006952
2.0_INSECT_GG3J73P03FJR6E	GO:0008152	GO:0016747	GO:0009055	GO:0051536	GO:0004872	GO:0005488	GO:0007155	GO:0007160	GO:0007229	GO:0008305	GO:0005576	GO:0005515	GO:0006952	GO:0009405
2.0_INSECT_GG3J73P03FJRAY	GO:0008152	GO:0016747	GO:0009055	GO:0051536	GO:0005515	GO:0005576	GO:0004872	GO:0005488	GO:0007155	GO:0007160	GO:0007229	GO:0008305	GO:0006952
2.0_INSECT_GG3J73P03FJRV7	GO:0008152	GO:0016747	GO:0009055	GO:0005515	GO:0005576
2.0_INSECT_GG3J73P03FJSDH	GO:0005515	GO:0009055	GO:0005525	GO:0005874	GO:0007017	GO:0005576	GO:0008152	GO:0016747	GO:0006952	GO:0004872	GO:0005488	GO:0007155	GO:0007160	GO:0007229	GO:0008305	GO:0005199	GO:0009277	GO:0051536
2.0_INSECT_GG3J73P03FJSU3	GO:0009055	GO:0051536	GO:0005576	GO:0008152	GO:0016747	GO:0005515	GO:0006952	GO:0009405	GO:0004872	GO:0005488	GO:0007155	GO:0007160	GO:0007229	GO:0008305
2.0_INSECT_GG3J73P03FJSZ8	GO:0009055	GO:0051536	GO:0004872	GO:0005488	GO:0007155	GO:0007160	GO:0007229	GO:0008305	GO:0005576	GO:0005515	GO:0008152	GO:0016747	GO:0006952	GO:0046872
2.0_INSECT_GG3J73P03FJTEC	GO:0008152	GO:0016747	GO:0005515
2.0_INSECT_GG3J73P03FJU0F	GO:0009055	GO:0005515	GO:0005576	GO:0051536	GO:0004872	GO:0005488	GO:0007155	GO:0007160	GO:0007229	GO:0008305	GO:0005525	GO:0005874	GO:0007017	GO:0008152	GO:0016747	GO:0006952
2.0_INSECT_GG3J73P03FJUEF	GO:0009055	GO:0008152	GO:0016747
2.0_INSECT_GG3J73P03FJUKQ	GO:0005576	GO:0009055
2.0_INSECT_GG3J73P03FJUNW	GO:0005576	GO:0009055	GO:0005515	GO:0051536	GO:0008152	GO:0016747	GO:0006952	GO:0005525	GO:0005874	GO:0007017	GO:0016068	GO:0004872	GO:0005488	GO:0007155	GO:0007160	GO:0007229	GO:0008305
2.0_INSECT_GG3J73P03FJUXO	GO:0005576	GO:0009055	GO:0005515	GO:0051536	GO:0008152	GO:0016747	GO:0016068	GO:0005199	GO:0009277	GO:0005525	GO:0005874	GO:0007017	GO:0042309	GO:0050825	GO:0050826
2.0_INSECT_GG3J73P03FJV4C	GO:0005576	GO:0006952
2.0_INSECT_GG3J73P03FJVVT	GO:0009055	GO:0051536	GO:0005515	GO:0008152	GO:0016747	GO:0005576	GO:0046872
2.0_INSECT_GG3J73P03FJWBP	GO:0009055
2.0_INSECT_GG3J73P03FJWE9	GO:0009055	GO:0005515	GO:0008152	GO:0016747	GO:0051536	GO:0005576	GO:0006952	GO:0004872	GO:0005488	GO:0007155	GO:0007160	GO:0007229	GO:0008305
2.0_INSECT_GG3J73P03FJXR4	GO:0004872	GO:0005488	GO:0007155	GO:0007160	GO:0007229	GO:0008305	GO:0009055	GO:0005576	GO:0005515	GO:0005525	GO:0005874	GO:0007017	GO:0008152	GO:0016747	GO:0051536	GO:0006952	GO:0016068
2.0_INSECT_GG3J73P03FJXSO	GO:0009055	GO:0005576	GO:0051536	GO:0004872	GO:0005488	GO:0007155	GO:0007160	GO:0007229	GO:0008305	GO:0005515	GO:0006952	GO:0009755	GO:0008152	GO:0016747	GO:0005525	GO:0005874	GO:0007017
2.0_INSECT_GG3J73P03FJY1X	GO:0009055
2.0_INSECT_GG3J73P03FJYDW	GO:0009055	GO:0051536	GO:0005576	GO:0006952	GO:0005515	GO:0008152	GO:0016747	GO:0042309	GO:0050825	GO:0050826	GO:0005525	GO:0005874	GO:0007017
2.0_INSECT_GG3J73P03FJYE2	GO:0009055	GO:0005515	GO:0051536	GO:0016068	GO:0008152	GO:0016747	GO:0004872	GO:0005488	GO:0007155	GO:0007160	GO:0007229	GO:0008305	GO:0005576	GO:0005199	GO:0009277	GO:0005525	GO:0005874	GO:0007017
2.0_INSECT_GG3J73P03FJYTD	GO:0008152	GO:0016747	GO:0009055	GO:0005525	GO:0005874	GO:0007017	GO:0005515	GO:0004872	GO:0005488	GO:0007155	GO:0007160	GO:0007229	GO:0008305	GO:0005576	GO:0051536	GO:0042309	GO:0050825	GO:0050826
2.0_INSECT_GG3J73P03FK04Y	GO:0009055	GO:0005576	GO:0008152	GO:0016747	GO:0051536	GO:0005515	GO:0005525	GO:0005874	GO:0007017	GO:0006952	GO:0004872	GO:0005488	GO:0007155	GO:0007160	GO:0007229	GO:0008305
2.0_INSECT_GG3J73P03FK0LP	GO:0008152	GO:0016747	GO:0009055	GO:0051536	GO:0005576	GO:0006952	GO:0005515	GO:0004872	GO:0005488	GO:0007155	GO:0007160	GO:0007229	GO:0008305
2.0_INSECT_GG3J73P03FK1BU	GO:0005525	GO:0005874	GO:0007017	GO:0009055
2.0_INSECT_GG3J73P03FK1F0	GO:0009055	GO:0005515	GO:0051536	GO:0005576	GO:0005525	GO:0005874	GO:0007017	GO:0008152	GO:0016747	GO:0006952	GO:0004872	GO:0005488	GO:0007155	GO:0007160	GO:0007229	GO:0008305	GO:0001558	GO:0005520	GO:0005199	GO:0009277
2.0_INSECT_GG3J73P03FK1HH	GO:0009055	GO:0004872	GO:0005488	GO:0007155	GO:0007160	GO:0007229	GO:0008305	GO:0005576	GO:0006952	GO:0005515	GO:0008152	GO:0016747	GO:0051536	GO:0009755
2.0_INSECT_GG3J73P03FK28K	GO:0008152	GO:0016747	GO:0005515	GO:0009055	GO:0051536	GO:0005576	GO:0004872	GO:0005488	GO:0007155	GO:0007160	GO:0007229	GO:0008305
2.0_INSECT_GG3J73P03FK2ML	GO:0008152	GO:0016747	GO:0009055	GO:0005576	GO:0005515	GO:0051536	GO:0006952	GO:0004872	GO:0005488	GO:0007155	GO:0007160	GO:0007229	GO:0008305	GO:0046872	GO:0005525	GO:0005874	GO:0007017	GO:0005199	GO:0009277
2.0_INSECT_GG3J73P03FK3GG	GO:0005576	GO:0008152	GO:0016747	GO:0009055	GO:0004872	GO:0005488	GO:0007155	GO:0007160	GO:0007229	GO:0008305	GO:0005515	GO:0051536	GO:0006952
2.0_INSECT_GG3J73P03FK34G	GO:0009055	GO:0051536	GO:0008152	GO:0016747	GO:0005515	GO:0005576	GO:0001558	GO:0005520	GO:0004872	GO:0005488	GO:0007155	GO:0007160	GO:0007229	GO:0008305	GO:0006952
2.0_INSECT_GG3J73P03FK3QS	GO:0009055	GO:0005515	GO:0008152	GO:0016747	GO:0004872	GO:0005488	GO:0007155	GO:0007160	GO:0007229	GO:0008305	GO:0005576	GO:0006952	GO:0005525	GO:0005874	GO:0007017
2.0_INSECT_GG3J73P03FK4HI	GO:0008152	GO:0016747	GO:0009055	GO:0004872	GO:0005488	GO:0007155	GO:0007160	GO:0007229	GO:0008305	GO:0005515	GO:0051536	GO:0005576	GO:0005525	GO:0005874	GO:0007017
2.0_INSECT_GG3J73P03FK595	GO:0009055	GO:0005576	GO:0006952	GO:0005515
2.0_INSECT_GG3J73P03FK5TP	GO:0009055	GO:0005576	GO:0006952	GO:0005515	GO:0051536	GO:0008152	GO:0016747	GO:0016068	GO:0005525	GO:0005874	GO:0007017	GO:0004872	GO:0005488	GO:0007155	GO:0007160	GO:0007229	GO:0008305	GO:0009755	GO:0009405
2.0_INSECT_GG3J73P03FK5W8	GO:0009055	GO:0005576	GO:0005515
2.0_INSECT_GG3J73P03FK5ZA	GO:0009055	GO:0005576	GO:0006952	GO:0005515	GO:0051536	GO:0009405	GO:0008152	GO:0016747	GO:0004872	GO:0005488	GO:0007155	GO:0007160	GO:0007229	GO:0008305	GO:0005199	GO:0009277	GO:0005525	GO:0005874	GO:0007017
2.0_INSECT_GG3J73P03FK69B	GO:0008152	GO:0016747	GO:0009055	GO:0005576	GO:0005515	GO:0004872	GO:0005488	GO:0007155	GO:0007160	GO:0007229	GO:0008305	GO:0006952	GO:0005525	GO:0005874	GO:0007017	GO:0051536	GO:0016068
2.0_INSECT_GG3J73P03FK6R4	GO:0009055	GO:0005576	GO:0005515
2.0_INSECT_GG3J73P03FK6W5	GO:0009055	GO:0005525	GO:0005874	GO:0007017	GO:0008152	GO:0016747	GO:0005576	GO:0004872	GO:0005488	GO:0007155	GO:0007160	GO:0007229	GO:0008305	GO:0005515	GO:0051536
2.0_INSECT_GG3J73P03FK6YK	GO:0008152	GO:0016747	GO:0009055	GO:0051536	GO:0005515	GO:0004872	GO:0005488	GO:0007155	GO:0007160	GO:0007229	GO:0008305	GO:0005576
2.0_INSECT_GG3J73P03FK81O	GO:0009055	GO:0051536	GO:0005515	GO:0008152	GO:0016747
2.0_INSECT_GG3J73P03FK826	GO:0008152	GO:0016747	GO:0009055	GO:0005515	GO:0051536	GO:0005576	GO:0005525	GO:0005874	GO:0007017	GO:0004872	GO:0005488	GO:0007155	GO:0007160	GO:0007229	GO:0008305
2.0_INSECT_GG3J73P03FK8LM	GO:0009055	GO:0008152	GO:0016747	GO:0005576	GO:0005515	GO:0005525	GO:0005874	GO:0007017	GO:0004872	GO:0005488	GO:0007155	GO:0007160	GO:0007229	GO:0008305	GO:0051536
2.0_INSECT_GG3J73P03FK9AO	GO:0009055	GO:0005576	GO:0005515	GO:0004872	GO:0005488	GO:0007155	GO:0007160	GO:0007229	GO:0008305
2.0_INSECT_GG3J73P03FK9BN	GO:0008152	GO:0016747	GO:0009055	GO:0051536	GO:0005576	GO:0005515
2.0_INSECT_GG3J73P03FKAMK	GO:0004872	GO:0005488	GO:0007155	GO:0007160	GO:0007229	GO:0008305	GO:0005515	GO:0008152	GO:0016747	GO:0009055	GO:0005525	GO:0005874	GO:0007017
2.0_INSECT_GG3J73P03FKB2T	GO:0008152	GO:0016747	GO:0005576	GO:0005515	GO:0009055	GO:0004872	GO:0005488	GO:0007155	GO:0007160	GO:0007229	GO:0008305	GO:0051536	GO:0005525	GO:0005874	GO:0007017	GO:0016068	GO:0006952
2.0_INSECT_GG3J73P03FKBI6	GO:0009055	GO:0004872	GO:0005488	GO:0007155	GO:0007160	GO:0007229	GO:0008305
2.0_INSECT_GG3J73P03FKDGL	GO:0009055	GO:0008152	GO:0016747	GO:0005576	GO:0005515	GO:0004872	GO:0005488	GO:0007155	GO:0007160	GO:0007229	GO:0008305	GO:0006952	GO:0051536	GO:0005525	GO:0005874	GO:0007017
2.0_INSECT_GG3J73P03FKDSP	GO:0005576	GO:0005515	GO:0009055	GO:0051536	GO:0008152	GO:0016747	GO:0005525	GO:0005874	GO:0007017	GO:0006952	GO:0004872	GO:0005488	GO:0007155	GO:0007160	GO:0007229	GO:0008305	GO:0005199	GO:0009277	GO:0046872
2.0_INSECT_GG3J73P03FKDZP	GO:0009055	GO:0008152	GO:0016747	GO:0005515	GO:0051536	GO:0005576	GO:0005525	GO:0005874	GO:0007017	GO:0004872	GO:0005488	GO:0007155	GO:0007160	GO:0007229	GO:0008305	GO:0006952
2.0_INSECT_GG3J73P03FKEB1	GO:0008152	GO:0016747	GO:0009055	GO:0004872	GO:0005488	GO:0007155	GO:0007160	GO:0007229	GO:0008305	GO:0005576	GO:0005515	GO:0051536	GO:0016068	GO:0005525	GO:0005874	GO:0007017	GO:0006952
2.0_INSECT_GG3J73P03FKEFM	GO:0009055	GO:0005515	GO:0051536	GO:0005576	GO:0008152	GO:0016747	GO:0004872	GO:0005488	GO:0007155	GO:0007160	GO:0007229	GO:0008305	GO:0006952	GO:0016068	GO:0005199	GO:0009277	GO:0005525	GO:0005874	GO:0007017
2.0_INSECT_GG3J73P03FKEFT	GO:0009055
2.0_INSECT_GG3J73P03FKEIC	GO:0005576	GO:0006952
2.0_INSECT_GG3J73P03FKEVE	GO:0008152	GO:0016747	GO:0009055	GO:0005515	GO:0051536	GO:0005576	GO:0004872	GO:0005488	GO:0007155	GO:0007160	GO:0007229	GO:0008305	GO:0006952
2.0_INSECT_GG3J73P03FKFN7	GO:0009055
2.0_INSECT_GG3J73P03FKG0E	GO:0009055	GO:0051536
2.0_INSECT_GG3J73P03FKGEU	GO:0008152	GO:0016747	GO:0009055	GO:0051536	GO:0005515	GO:0005576	GO:0006952	GO:0005525	GO:0005874	GO:0007017	GO:0004872	GO:0005488	GO:0007155	GO:0007160	GO:0007229	GO:0008305
2.0_INSECT_GG3J73P03FKGLK	GO:0008152	GO:0016747	GO:0005515	GO:0005576	GO:0009055	GO:0051536	GO:0004872	GO:0005488	GO:0007155	GO:0007160	GO:0007229	GO:0008305	GO:0005525	GO:0005874	GO:0007017	GO:0006952
2.0_INSECT_GG3J73P03FKHS5	GO:0008152	GO:0016747	GO:0005515	GO:0009055	GO:0004872	GO:0005488	GO:0007155	GO:0007160	GO:0007229	GO:0008305	GO:0005576	GO:0051536	GO:0005525	GO:0005874	GO:0007017
2.0_INSECT_GG3J73P03FKIHL	GO:0005515	GO:0008152	GO:0016747	GO:0005525	GO:0005874	GO:0007017	GO:0005576	GO:0009055	GO:0016068
2.0_INSECT_GG3J73P03FKK1K	GO:0009055	GO:0004872	GO:0005488	GO:0007155	GO:0007160	GO:0007229	GO:0008305	GO:0005576	GO:0005515	GO:0051536	GO:0006952	GO:0008152	GO:0016747	GO:0016068
2.0_INSECT_GG3J73P03FKK3I	GO:0009055	GO:0004252	GO:0006508	GO:0005515	GO:0005576	GO:0008152	GO:0016747	GO:0006952
2.0_INSECT_GG3J73P03FKKIM	GO:0009055	GO:0051536	GO:0005576	GO:0006952	GO:0005515	GO:0004872	GO:0005488	GO:0007155	GO:0007160	GO:0007229	GO:0008305	GO:0008152	GO:0016747	GO:0005199	GO:0009277
2.0_INSECT_GG3J73P03FKKJF	GO:0009055	GO:0005576	GO:0005515
2.0_INSECT_GG3J73P03FKKOK	GO:0009055	GO:0005515	GO:0004872	GO:0005488	GO:0007155	GO:0007160	GO:0007229	GO:0008305	GO:0005576	GO:0016068	GO:0008152	GO:0016747	GO:0051536
2.0_INSECT_GG3J73P03FKM58	GO:0009055	GO:0005576	GO:0005515	GO:0051536	GO:0008152	GO:0016747	GO:0005525	GO:0005874	GO:0007017	GO:0006952	GO:0004872	GO:0005488	GO:0007155	GO:0007160	GO:0007229	GO:0008305	GO:0016068
2.0_INSECT_GG3J73P03FKM9C	GO:0009055	GO:0005576	GO:0005515	GO:0009755
2.0_INSECT_GG3J73P03FKN3N	GO:0009055	GO:0051536	GO:0005515	GO:0008152	GO:0016747	GO:0004872	GO:0005488	GO:0007155	GO:0007160	GO:0007229	GO:0008305	GO:0005576	GO:0006952
2.0_INSECT_GG3J73P03FKO2R	GO:0009055	GO:0005515	GO:0008152	GO:0016747	GO:0051536	GO:0005576
2.0_INSECT_GG3J73P03FKOHF	GO:0009055	GO:0005525	GO:0005874	GO:0007017	GO:0008152	GO:0016747	GO:0051536	GO:0005515	GO:0004872	GO:0005488	GO:0007155	GO:0007160	GO:0007229	GO:0008305	GO:0005576	GO:0006952
2.0_INSECT_GG3J73P03FKP1Y	GO:0009055	GO:0004872	GO:0005488	GO:0007155	GO:0007160	GO:0007229	GO:0008305	GO:0005515	GO:0005576	GO:0008152	GO:0016747	GO:0051536	GO:0006952
2.0_INSECT_GG3J73P03FKQZJ	GO:0009055	GO:0008152	GO:0016747	GO:0005576	GO:0005515	GO:0051536	GO:0004872	GO:0005488	GO:0007155	GO:0007160	GO:0007229	GO:0008305	GO:0005525	GO:0005874	GO:0007017	GO:0016068	GO:0006952	GO:0001558	GO:0005520
2.0_INSECT_GG3J73P03FKR8W	GO:0009055	GO:0051536	GO:0005576	GO:0006952	GO:0005515	GO:0008152	GO:0016747	GO:0005525	GO:0005874	GO:0007017	GO:0004872	GO:0005488	GO:0007155	GO:0007160	GO:0007229	GO:0008305
2.0_INSECT_GG3J73P03FKR9B	GO:0004872	GO:0005488	GO:0007155	GO:0007160	GO:0007229	GO:0008305	GO:0005576	GO:0005515	GO:0009055	GO:0051536	GO:0006952	GO:0008152	GO:0016747	GO:0005525	GO:0005874	GO:0007017	GO:0005199	GO:0009277
2.0_INSECT_GG3J73P03FKRJ6	GO:0009055	GO:0005515	GO:0008152	GO:0016747
2.0_INSECT_GG3J73P03FKRNL	GO:0005576	GO:0008152	GO:0016747	GO:0005515	GO:0016068	GO:0009055	GO:0005525	GO:0005874	GO:0007017	GO:0006952	GO:0009755
2.0_INSECT_GG3J73P03FKS7P	GO:0005576	GO:0006952	GO:0005515	GO:0009055	GO:0008152	GO:0016747
2.0_INSECT_GG3J73P03FKSYN	GO:0005576	GO:0009055	GO:0005515
2.0_INSECT_GG3J73P03FKTW4	GO:0009055	GO:0005515	GO:0051536	GO:0005576	GO:0008152	GO:0016747	GO:0005199	GO:0009277	GO:0004872	GO:0005488	GO:0007155	GO:0007160	GO:0007229	GO:0008305	GO:0005525	GO:0005874	GO:0007017	GO:0006952
2.0_INSECT_GG3J73P03FKUAE	GO:0009055	GO:0005576	GO:0006952	GO:0005515	GO:0051536	GO:0008152	GO:0016747	GO:0005525	GO:0005874	GO:0007017
2.0_INSECT_GG3J73P03FKUMK	GO:0008152	GO:0016747	GO:0009055	GO:0051536	GO:0005576	GO:0005515
2.0_INSECT_GG3J73P03FKUN9	GO:0009055	GO:0005576	GO:0005515	GO:0005525	GO:0005874	GO:0007017	GO:0008152	GO:0016747	GO:0006952	GO:0051536
2.0_INSECT_GG3J73P03FKVXK	GO:0005515	GO:0009055	GO:0005576	GO:0009755	GO:0051536	GO:0008152	GO:0016747	GO:0006952	GO:0004872	GO:0005488	GO:0007155	GO:0007160	GO:0007229	GO:0008305	GO:0005525	GO:0005874	GO:0007017
2.0_INSECT_GG3J73P03FKW3H	GO:0009055	GO:0008152	GO:0016747	GO:0005576	GO:0005515	GO:0051536	GO:0006952	GO:0005525	GO:0005874	GO:0007017	GO:0004872	GO:0005488	GO:0007155	GO:0007160	GO:0007229	GO:0008305
2.0_INSECT_GG3J73P03FKWKT	GO:0004872	GO:0005488	GO:0007155	GO:0007160	GO:0007229	GO:0008305	GO:0005576	GO:0005515	GO:0008152	GO:0016747	GO:0009055	GO:0006952	GO:0005525	GO:0005874	GO:0007017	GO:0051536
2.0_INSECT_GG3J73P03FKWNX	GO:0009055	GO:0008152	GO:0016747	GO:0051536
2.0_INSECT_GG3J73P03FKWOT	GO:0008152	GO:0016747	GO:0005515	GO:0009055	GO:0051536	GO:0005576	GO:0006952
2.0_INSECT_GG3J73P03FKXJX	GO:0009055	GO:0005515	GO:0008152	GO:0016747	GO:0005525	GO:0005874	GO:0007017	GO:0051536	GO:0005576	GO:0006952	GO:0004872	GO:0005488	GO:0007155	GO:0007160	GO:0007229	GO:0008305
2.0_INSECT_GG3J73P03FKXSP	GO:0005515
2.0_INSECT_GG3J73P03FKXY1	GO:0009055	GO:0005576	GO:0005515	GO:0005525	GO:0005874	GO:0007017	GO:0051536	GO:0006952	GO:0004872	GO:0005488	GO:0007155	GO:0007160	GO:0007229	GO:0008305	GO:0009755	GO:0005199	GO:0009277	GO:0042309	GO:0050825	GO:0050826	GO:0008152	GO:0016747
2.0_INSECT_GG3J73P03FKZ09	GO:0009055	GO:0051536	GO:0005576	GO:0005515
2.0_INSECT_GG3J73P03FKZ17	GO:0009055	GO:0051536	GO:0005576	GO:0005515	GO:0008152	GO:0016747	GO:0005525	GO:0005874	GO:0007017	GO:0004872	GO:0005488	GO:0007155	GO:0007160	GO:0007229	GO:0008305	GO:0005199	GO:0009277	GO:0006952
2.0_INSECT_GG3J73P03FKZS8	GO:0005515
2.0_INSECT_GG3J73P03FL19L	GO:0009055	GO:0008152	GO:0016747	GO:0005515	GO:0051536	GO:0005576	GO:0006952	GO:0005525	GO:0005874	GO:0007017
2.0_INSECT_GG3J73P03FL1LZ	GO:0009055	GO:0051536	GO:0005576	GO:0006952	GO:0005515	GO:0008152	GO:0016747
2.0_INSECT_GG3J73P03FL2G6	GO:0009055	GO:0005576	GO:0006952	GO:0005515	GO:0051536
2.0_INSECT_GG3J73P03FL2NQ	GO:0008152	GO:0016747	GO:0009055	GO:0051536	GO:0005515	GO:0005525	GO:0005874	GO:0007017	GO:0004872	GO:0005488	GO:0007155	GO:0007160	GO:0007229	GO:0008305	GO:0005576
2.0_INSECT_GG3J73P03FL2YF	GO:0009055	GO:0005576	GO:0006952	GO:0005515	GO:0004872	GO:0005488	GO:0007155	GO:0007160	GO:0007229	GO:0008305	GO:0008152	GO:0016747	GO:0005525	GO:0005874	GO:0007017
2.0_INSECT_GG3J73P03FL343	GO:0009055	GO:0005576	GO:0006952	GO:0005515	GO:0051536	GO:0008152	GO:0016747	GO:0005199	GO:0009277	GO:0004872	GO:0005488	GO:0007155	GO:0007160	GO:0007229	GO:0008305	GO:0005525	GO:0005874	GO:0007017	GO:0042309	GO:0050825	GO:0050826
2.0_INSECT_GG3J73P03FL47E	GO:0009055	GO:0008152	GO:0016747	GO:0005525	GO:0005874	GO:0007017	GO:0005515	GO:0005576	GO:0051536	GO:0006952	GO:0005199	GO:0009277
2.0_INSECT_GG3J73P03FL4MD	GO:0009055	GO:0008152	GO:0016747
2.0_INSECT_GG3J73P03FL4TC	GO:0009055	GO:0005576	GO:0006952	GO:0005515	GO:0051536	GO:0008152	GO:0016747	GO:0005525	GO:0005874	GO:0007017	GO:0004872	GO:0005488	GO:0007155	GO:0007160	GO:0007229	GO:0008305
2.0_INSECT_GG3J73P03FL55S	GO:0009055	GO:0005515	GO:0005576	GO:0006952
2.0_INSECT_GG3J73P03FL5RT	GO:0009055	GO:0005576	GO:0005515	GO:0006952	GO:0008152	GO:0016747	GO:0051536	GO:0004872	GO:0005488	GO:0007155	GO:0007160	GO:0007229	GO:0008305	GO:0005525	GO:0005874	GO:0007017
2.0_INSECT_GG3J73P03FL72G	GO:0009055	GO:0051536	GO:0005576	GO:0005515	GO:0008152	GO:0016747	GO:0006952	GO:0004872	GO:0005488	GO:0007155	GO:0007160	GO:0007229	GO:0008305	GO:0046872
2.0_INSECT_GG3J73P03FL7OK	GO:0009055	GO:0004872	GO:0005488	GO:0007155	GO:0007160	GO:0007229	GO:0008305	GO:0005576	GO:0005515	GO:0008152	GO:0016747	GO:0051536	GO:0005525	GO:0005874	GO:0007017	GO:0006952	GO:0005199	GO:0009277
2.0_INSECT_GG3J73P03FL8KK	GO:0005515	GO:0009055	GO:0005576	GO:0008152	GO:0016747
2.0_INSECT_GG3J73P03FL8PA	GO:0008152	GO:0016747	GO:0005576	GO:0005515
2.0_INSECT_GG3J73P03FL901	GO:0008152	GO:0016747	GO:0005515	GO:0009055	GO:0005576	GO:0005525	GO:0005874	GO:0007017	GO:0051536	GO:0006952
2.0_INSECT_GG3J73P03FL9NL	GO:0009055	GO:0005576	GO:0005515
2.0_INSECT_GG3J73P03FLA3V	GO:0009055	GO:0005576	GO:0005515
2.0_INSECT_GG3J73P03FLA60	GO:0009055	GO:0004872	GO:0005488	GO:0007155	GO:0007160	GO:0007229	GO:0008305	GO:0005515	GO:0051536	GO:0005576	GO:0006952	GO:0008152	GO:0016747	GO:0009755	GO:0005525	GO:0005874	GO:0007017
2.0_INSECT_GG3J73P03FLAF4	GO:0009055	GO:0008152	GO:0016747	GO:0005199	GO:0009277	GO:0005515	GO:0004872	GO:0005488	GO:0007155	GO:0007160	GO:0007229	GO:0008305	GO:0005576	GO:0051536	GO:0006952	GO:0005525	GO:0005874	GO:0007017
2.0_INSECT_GG3J73P03FLAGY	GO:0009055	GO:0051536	GO:0005515	GO:0004872	GO:0005488	GO:0007155	GO:0007160	GO:0007229	GO:0008305	GO:0005576	GO:0006952	GO:0008152	GO:0016747
2.0_INSECT_GG3J73P03FLAJJ	GO:0009055	GO:0005576	GO:0005515	GO:0008152	GO:0016747	GO:0006952	GO:0004872	GO:0005488	GO:0007155	GO:0007160	GO:0007229	GO:0008305	GO:0051536	GO:0046872
2.0_INSECT_GG3J73P03FLAP5	GO:0008152	GO:0016747	GO:0005576	GO:0009055	GO:0005515	GO:0006952	GO:0005199	GO:0009277	GO:0051536	GO:0004872	GO:0005488	GO:0007155	GO:0007160	GO:0007229	GO:0008305	GO:0005525	GO:0005874	GO:0007017
2.0_INSECT_GG3J73P03FLDBA	GO:0005515	GO:0009055	GO:0005576	GO:0008152	GO:0016747	GO:0004872	GO:0005488	GO:0007155	GO:0007160	GO:0007229	GO:0008305	GO:0006952	GO:0046872	GO:0051536	GO:0005525	GO:0005874	GO:0007017	GO:0005199	GO:0009277
2.0_INSECT_GG3J73P03FLDLU	GO:0009055	GO:0005576	GO:0005515	GO:0051536	GO:0008152	GO:0016747	GO:0004872	GO:0005488	GO:0007155	GO:0007160	GO:0007229	GO:0008305	GO:0006952
2.0_INSECT_GG3J73P03FLE2I	GO:0009055	GO:0005576	GO:0005515	GO:0051536	GO:0004872	GO:0005488	GO:0007155	GO:0007160	GO:0007229	GO:0008305	GO:0006952	GO:0016068	GO:0008152	GO:0016747
2.0_INSECT_GG3J73P03FLE6G	GO:0008152	GO:0016747	GO:0005525	GO:0005874	GO:0007017	GO:0005515	GO:0005576	GO:0009055	GO:0005199	GO:0009277	GO:0051536	GO:0016068
2.0_INSECT_GG3J73P03FLF12	GO:0005515
2.0_INSECT_GG3J73P03FLF1C	GO:0009055
2.0_INSECT_GG3J73P03FLFN8	GO:0009055	GO:0051536	GO:0005576	GO:0006952	GO:0005515	GO:0008152	GO:0016747	GO:0005525	GO:0005874	GO:0007017
2.0_INSECT_GG3J73P03FLG9V	GO:0009055	GO:0005525	GO:0005874	GO:0007017	GO:0005576	GO:0006952	GO:0008152	GO:0016747	GO:0005515	GO:0051536
2.0_INSECT_GG3J73P03FLGYY	GO:0005576	GO:0009055	GO:0008152	GO:0016747	GO:0005515	GO:0006952	GO:0051536	GO:0004872	GO:0005488	GO:0007155	GO:0007160	GO:0007229	GO:0008305	GO:0005199	GO:0009277
2.0_INSECT_GG3J73P03FLH3Z	GO:0008152	GO:0016747	GO:0005576	GO:0006952	GO:0005515	GO:0009055	GO:0046872	GO:0005525	GO:0005874	GO:0007017	GO:0051536	GO:0004872	GO:0005488	GO:0007155	GO:0007160	GO:0007229	GO:0008305
2.0_INSECT_GG3J73P03FLH55	GO:0009055	GO:0005515	GO:0005576	GO:0008152	GO:0016747	GO:0051536	GO:0005525	GO:0005874	GO:0007017	GO:0004872	GO:0005488	GO:0007155	GO:0007160	GO:0007229	GO:0008305	GO:0006952	GO:0046872
2.0_INSECT_GG3J73P03FLHE9	GO:0005576	GO:0009055	GO:0051536	GO:0005515	GO:0008152	GO:0016747	GO:0006952	GO:0005525	GO:0005874	GO:0007017	GO:0004872	GO:0005488	GO:0007155	GO:0007160	GO:0007229	GO:0008305	GO:0005199	GO:0009277
2.0_INSECT_GG3J73P03FLIHC	GO:0009055	GO:0008152	GO:0016747
2.0_INSECT_GG3J73P03FLIJ2	GO:0005515	GO:0009055
2.0_INSECT_GG3J73P03FLIRC	GO:0009055	GO:0005576	GO:0005515	GO:0008152	GO:0016747	GO:0051536	GO:0004872	GO:0005488	GO:0007155	GO:0007160	GO:0007229	GO:0008305	GO:0005525	GO:0005874	GO:0007017
2.0_INSECT_GG3J73P03FLIWA	GO:0008152	GO:0016747	GO:0005515	GO:0005576	GO:0009055	GO:0051536	GO:0006952
2.0_INSECT_GG3J73P03FLJ2Q	GO:0005515	GO:0008152	GO:0016747	GO:0009055	GO:0051536	GO:0005525	GO:0005874	GO:0007017	GO:0005576	GO:0006952	GO:0004872	GO:0005488	GO:0007155	GO:0007160	GO:0007229	GO:0008305
2.0_INSECT_GG3J73P03FLJ52	GO:0005515	GO:0009055	GO:0051536	GO:0004872	GO:0005488	GO:0007155	GO:0007160	GO:0007229	GO:0008305	GO:0005576	GO:0006952	GO:0008152	GO:0016747
2.0_INSECT_GG3J73P03FLJKQ	GO:0009055	GO:0005515	GO:0051536	GO:0005576	GO:0008152	GO:0016747	GO:0006952	GO:0005525	GO:0005874	GO:0007017	GO:0004872	GO:0005488	GO:0007155	GO:0007160	GO:0007229	GO:0008305	GO:0009405	GO:0005199	GO:0009277
2.0_INSECT_GG3J73P03FLKAZ	GO:0009055	GO:0005515	GO:0005576	GO:0006952	GO:0008152	GO:0016747	GO:0004872	GO:0005488	GO:0007155	GO:0007160	GO:0007229	GO:0008305	GO:0005199	GO:0009277	GO:0051536
2.0_INSECT_GG3J73P03FLKBN	GO:0009055	GO:0005515	GO:0005576	GO:0005525	GO:0005874	GO:0007017	GO:0008152	GO:0016747	GO:0004872	GO:0005488	GO:0007155	GO:0007160	GO:0007229	GO:0008305	GO:0006952	GO:0046872	GO:0051536
2.0_INSECT_GG3J73P03FLKPJ	GO:0008152	GO:0016747	GO:0009055	GO:0005199	GO:0009277	GO:0051536	GO:0005515
2.0_INSECT_GG3J73P03FLKRD	GO:0008152	GO:0016747
2.0_INSECT_GG3J73P03FLLTT	GO:0009055	GO:0005576	GO:0005515	GO:0008152	GO:0016747	GO:0005199	GO:0009277	GO:0004872	GO:0005488	GO:0007155	GO:0007160	GO:0007229	GO:0008305	GO:0006952	GO:0051536	GO:0005525	GO:0005874	GO:0007017
2.0_INSECT_GG3J73P03FLNB1	GO:0009055	GO:0051536	GO:0005576	GO:0005515	GO:0008152	GO:0016747	GO:0005525	GO:0005874	GO:0007017	GO:0004872	GO:0005488	GO:0007155	GO:0007160	GO:0007229	GO:0008305	GO:0006952
2.0_INSECT_GG3J73P03FLNNE	GO:0009055	GO:0051536	GO:0005576	GO:0006952	GO:0005515	GO:0004872	GO:0005488	GO:0007155	GO:0007160	GO:0007229	GO:0008305
2.0_INSECT_GG3J73P03FLOKF	GO:0009055	GO:0051536	GO:0005576	GO:0005515	GO:0008152	GO:0016747	GO:0005525	GO:0005874	GO:0007017	GO:0004872	GO:0005488	GO:0007155	GO:0007160	GO:0007229	GO:0008305	GO:0006952
2.0_INSECT_GG3J73P03FLOS3	GO:0009055	GO:0005515	GO:0005576	GO:0008152	GO:0016747	GO:0051536	GO:0005525	GO:0005874	GO:0007017	GO:0004872	GO:0005488	GO:0007155	GO:0007160	GO:0007229	GO:0008305	GO:0006952
2.0_INSECT_GG3J73P03FLOYP	GO:0009055	GO:0005576	GO:0001558	GO:0005520	GO:0005515	GO:0051536	GO:0004872	GO:0005488	GO:0007155	GO:0007160	GO:0007229	GO:0008305	GO:0008152	GO:0016747	GO:0006952
2.0_INSECT_GG3J73P03FLP13	GO:0008152	GO:0016747	GO:0009055	GO:0051536	GO:0005576	GO:0006952	GO:0005515	GO:0004872	GO:0005488	GO:0007155	GO:0007160	GO:0007229	GO:0008305	GO:0005525	GO:0005874	GO:0007017
2.0_INSECT_GG3J73P03FLPHW	GO:0009055	GO:0008152	GO:0016747	GO:0051536	GO:0005515
2.0_INSECT_GG3J73P03FLQGH	GO:0009055	GO:0005515
2.0_INSECT_GG3J73P03FLR05	GO:0008152	GO:0016747	GO:0009055	GO:0005525	GO:0005874	GO:0007017	GO:0005576	GO:0005515	GO:0051536	GO:0006952	GO:0016068	GO:0004872	GO:0005488	GO:0007155	GO:0007160	GO:0007229	GO:0008305
2.0_INSECT_GG3J73P03FLRPE	GO:0009055	GO:0005515	GO:0051536
2.0_INSECT_GG3J73P03FLRTC	GO:0009055	GO:0005576	GO:0051536	GO:0005515	GO:0008152	GO:0016747	GO:0004872	GO:0005488	GO:0007155	GO:0007160	GO:0007229	GO:0008305	GO:0006952	GO:0005525	GO:0005874	GO:0007017	GO:0016068
2.0_INSECT_GG3J73P03FLS1P	GO:0008152	GO:0016747	GO:0042309	GO:0050825	GO:0050826	GO:0009055	GO:0005525	GO:0005874	GO:0007017	GO:0005576	GO:0006952	GO:0005515
2.0_INSECT_GG3J73P03FLSE0	GO:0009055	GO:0051536
2.0_INSECT_GG3J73P03FLSS4	GO:0009055	GO:0051536	GO:0005576	GO:0005515	GO:0008152	GO:0016747	GO:0004872	GO:0005488	GO:0007155	GO:0007160	GO:0007229	GO:0008305	GO:0006952
2.0_INSECT_GG3J73P03FLTKP	GO:0009055	GO:0051536
2.0_INSECT_GG3J73P03FLTU7	GO:0009055	GO:0005576	GO:0008152	GO:0016747	GO:0006952	GO:0005515	GO:0004252	GO:0006508	GO:0051536	GO:0005525	GO:0005874	GO:0007017	GO:0004872	GO:0005488	GO:0007155	GO:0007160	GO:0007229	GO:0008305
2.0_INSECT_GG3J73P03FLU1B	GO:0009055	GO:0004872	GO:0005488	GO:0007155	GO:0007160	GO:0007229	GO:0008305	GO:0005576	GO:0005515	GO:0006952	GO:0046872	GO:0008152	GO:0016747	GO:0051536	GO:0005525	GO:0005874	GO:0007017	GO:0016068
2.0_INSECT_GG3J73P03FLUVN	GO:0008152	GO:0016747	GO:0009055	GO:0004872	GO:0005488	GO:0007155	GO:0007160	GO:0007229	GO:0008305	GO:0005576	GO:0005515	GO:0051536	GO:0006952	GO:0016068	GO:0005199	GO:0009277
2.0_INSECT_GG3J73P03FLVCL	GO:0009055	GO:0005576	GO:0005515
2.0_INSECT_GG3J73P03FLVGQ	GO:0009055	GO:0051536	GO:0005576	GO:0005515	GO:0009755	GO:0008152	GO:0016747	GO:0004872	GO:0005488	GO:0007155	GO:0007160	GO:0007229	GO:0008305
2.0_INSECT_GG3J73P03FLVTX	GO:0009055	GO:0005576	GO:0005515	GO:0006952	GO:0008152	GO:0016747	GO:0051536	GO:0005525	GO:0005874	GO:0007017	GO:0009405
2.0_INSECT_GG3J73P03FLW0J	GO:0009055	GO:0005515	GO:0051536	GO:0005576	GO:0006952	GO:0008152	GO:0016747	GO:0004872	GO:0005488	GO:0007155	GO:0007160	GO:0007229	GO:0008305
2.0_INSECT_GG3J73P03FLW6B	GO:0009055	GO:0005525	GO:0005874	GO:0007017	GO:0005576	GO:0005515	GO:0008152	GO:0016747	GO:0051536
2.0_INSECT_GG3J73P03FLWGB	GO:0008152	GO:0016747	GO:0009055	GO:0005576	GO:0006952	GO:0005515	GO:0051536	GO:0005525	GO:0005874	GO:0007017	GO:0046872	GO:0016068	GO:0005199	GO:0009277
2.0_INSECT_GG3J73P03FLWKW	GO:0008152	GO:0016747	GO:0009055	GO:0005515	GO:0005576	GO:0004872	GO:0005488	GO:0007155	GO:0007160	GO:0007229	GO:0008305	GO:0005525	GO:0005874	GO:0007017	GO:0051536	GO:0006952
2.0_INSECT_GG3J73P03FLWL4	GO:0009055	GO:0051536	GO:0005515	GO:0005576	GO:0006952	GO:0008152	GO:0016747	GO:0009405	GO:0004872	GO:0005488	GO:0007155	GO:0007160	GO:0007229	GO:0008305	GO:0005525	GO:0005874	GO:0007017	GO:0004252	GO:0006508	GO:0009755
2.0_INSECT_GG3J73P03FLX32	GO:0008152	GO:0016747
2.0_INSECT_GG3J73P03FLX4W	GO:0009055	GO:0008152	GO:0016747	GO:0005576	GO:0005515
2.0_INSECT_GG3J73P03FLX98	GO:0005515	GO:0008152	GO:0016747	GO:0009055	GO:0051536	GO:0016068	GO:0005576	GO:0006952	GO:0004872	GO:0005488	GO:0007155	GO:0007160	GO:0007229	GO:0008305	GO:0009755	GO:0005525	GO:0005874	GO:0007017	GO:0005199	GO:0009277
2.0_INSECT_GG3J73P03FLXB6	GO:0008152	GO:0016747	GO:0009055	GO:0005515
2.0_INSECT_GG3J73P03FLXC4	GO:0009055	GO:0051536	GO:0005576	GO:0005515	GO:0008152	GO:0016747	GO:0006952	GO:0004872	GO:0005488	GO:0007155	GO:0007160	GO:0007229	GO:0008305	GO:0016068	GO:0005525	GO:0005874	GO:0007017
2.0_INSECT_GG3J73P03FLXWR	GO:0005515	GO:0009055	GO:0005576	GO:0005525	GO:0005874	GO:0007017	GO:0006952	GO:0051536	GO:0009755	GO:0008152	GO:0016747	GO:0016068	GO:0004872	GO:0005488	GO:0007155	GO:0007160	GO:0007229	GO:0008305
2.0_INSECT_GG3J73P03FLY6K	GO:0008152	GO:0016747	GO:0009055	GO:0051536	GO:0004872	GO:0005488	GO:0007155	GO:0007160	GO:0007229	GO:0008305	GO:0005576	GO:0005515	GO:0005525	GO:0005874	GO:0007017	GO:0005199	GO:0009277	GO:0006952
2.0_INSECT_GG3J73P03FLYCT	GO:0009055	GO:0005515	GO:0005576	GO:0006952	GO:0005199	GO:0009277	GO:0051536	GO:0008152	GO:0016747	GO:0005525	GO:0005874	GO:0007017
2.0_INSECT_GG3J73P03FLYRM	GO:0009055	GO:0051536	GO:0004872	GO:0005488	GO:0007155	GO:0007160	GO:0007229	GO:0008305	GO:0005576	GO:0006952	GO:0005515	GO:0008152	GO:0016747	GO:0005525	GO:0005874	GO:0007017	GO:0046872
2.0_INSECT_GG3J73P03FLZBZ	GO:0009055	GO:0051536	GO:0005515
2.0_INSECT_GG3J73P03FLZPJ	GO:0004872	GO:0005488	GO:0007155	GO:0007160	GO:0007229	GO:0008305	GO:0005515	GO:0005576	GO:0009755	GO:0009055	GO:0005525	GO:0005874	GO:0007017	GO:0008152	GO:0016747	GO:0051536	GO:0006952
2.0_INSECT_GG3J73P03FM033	GO:0008152	GO:0016747	GO:0009055	GO:0051536	GO:0005576	GO:0005515
2.0_INSECT_GG3J73P03FM06L	GO:0009055	GO:0051536	GO:0005576	GO:0005515	GO:0008152	GO:0016747	GO:0006952	GO:0046872	GO:0004872	GO:0005488	GO:0007155	GO:0007160	GO:0007229	GO:0008305	GO:0005525	GO:0005874	GO:0007017	GO:0005199	GO:0009277	GO:0009405
2.0_INSECT_GG3J73P03FM0HO	GO:0009055	GO:0005576	GO:0005515
2.0_INSECT_GG3J73P03FM0M0	GO:0008152	GO:0016747	GO:0009055
2.0_INSECT_GG3J73P03FM0OY	GO:0009055	GO:0005515	GO:0005576
2.0_INSECT_GG3J73P03FM0VL	GO:0005576	GO:0006952	GO:0005515	GO:0009055	GO:0051536	GO:0004872	GO:0005488	GO:0007155	GO:0007160	GO:0007229	GO:0008305	GO:0008152	GO:0016747	GO:0016068	GO:0005525	GO:0005874	GO:0007017
2.0_INSECT_GG3J73P03FM14Y	GO:0009055	GO:0051536	GO:0005515	GO:0008152	GO:0016747
2.0_INSECT_GG3J73P03FM165	GO:0008152	GO:0016747	GO:0005576	GO:0005515	GO:0009055	GO:0005525	GO:0005874	GO:0007017	GO:0051536	GO:0004872	GO:0005488	GO:0007155	GO:0007160	GO:0007229	GO:0008305	GO:0006952
2.0_INSECT_GG3J73P03FM1BJ	GO:0009055	GO:0008152	GO:0016747	GO:0005576	GO:0005515	GO:0051536	GO:0004872	GO:0005488	GO:0007155	GO:0007160	GO:0007229	GO:0008305	GO:0006952	GO:0005525	GO:0005874	GO:0007017	GO:0009755
2.0_INSECT_GG3J73P03FM3QV	GO:0005576	GO:0006952	GO:0005515	GO:0008152	GO:0016747	GO:0009055	GO:0051536	GO:0004872	GO:0005488	GO:0007155	GO:0007160	GO:0007229	GO:0008305	GO:0005525	GO:0005874	GO:0007017	GO:0009755
2.0_INSECT_GG3J73P03FM3W7	GO:0009055	GO:0051536	GO:0005576	GO:0006952	GO:0005515	GO:0016068	GO:0004872	GO:0005488	GO:0007155	GO:0007160	GO:0007229	GO:0008305	GO:0008152	GO:0016747
2.0_INSECT_GG3J73P03FM44I	GO:0009055	GO:0051536	GO:0005525	GO:0005874	GO:0007017	GO:0005576	GO:0005515	GO:0008152	GO:0016747	GO:0004872	GO:0005488	GO:0007155	GO:0007160	GO:0007229	GO:0008305
2.0_INSECT_GG3J73P03FM4O6	GO:0008152	GO:0016747	GO:0009055	GO:0005576	GO:0005515	GO:0051536	GO:0004872	GO:0005488	GO:0007155	GO:0007160	GO:0007229	GO:0008305
2.0_INSECT_GG3J73P03FM5LA	GO:0009055	GO:0005576	GO:0005515	GO:0051536	GO:0004872	GO:0005488	GO:0007155	GO:0007160	GO:0007229	GO:0008305	GO:0005525	GO:0005874	GO:0007017	GO:0006952	GO:0008152	GO:0016747
2.0_INSECT_GG3J73P03FM6FG	GO:0008152	GO:0016747	GO:0009055	GO:0051536	GO:0005576	GO:0005515	GO:0006952	GO:0004872	GO:0005488	GO:0007155	GO:0007160	GO:0007229	GO:0008305
2.0_INSECT_GG3J73P03FM6MR	GO:0009055	GO:0005576	GO:0006952	GO:0005515	GO:0008152	GO:0016747
2.0_INSECT_GG3J73P03FM7SM	GO:0009055
2.0_INSECT_GG3J73P03FM7UW	GO:0009055	GO:0005515	GO:0051536	GO:0005576	GO:0008152	GO:0016747	GO:0006952	GO:0005525	GO:0005874	GO:0007017
2.0_INSECT_GG3J73P03FM9NQ	GO:0004872	GO:0005488	GO:0007155	GO:0007160	GO:0007229	GO:0008305	GO:0005576	GO:0005515
2.0_INSECT_GG3J73P03FM9NU	GO:0009055	GO:0005576	GO:0005515	GO:0008152	GO:0016747	GO:0051536	GO:0006952
2.0_INSECT_GG3J73P03FM9OV	GO:0005576	GO:0008152	GO:0016747	GO:0009055	GO:0005515	GO:0051536	GO:0004872	GO:0005488	GO:0007155	GO:0007160	GO:0007229	GO:0008305	GO:0006952
2.0_INSECT_GG3J73P03FM9VT	GO:0009055	GO:0004872	GO:0005488	GO:0007155	GO:0007160	GO:0007229	GO:0008305	GO:0005576	GO:0005515	GO:0008152	GO:0016747	GO:0051536
2.0_INSECT_GG3J73P03FMAOB	GO:0009055	GO:0005525	GO:0005874	GO:0007017	GO:0005515	GO:0005576	GO:0008152	GO:0016747	GO:0006952	GO:0051536	GO:0004872	GO:0005488	GO:0007155	GO:0007160	GO:0007229	GO:0008305
2.0_INSECT_GG3J73P03FMAT3	GO:0005515	GO:0009055	GO:0008152	GO:0016747	GO:0016068
2.0_INSECT_GG3J73P03FMB1T	GO:0009055	GO:0051536	GO:0005576	GO:0006952	GO:0005515
2.0_INSECT_GG3J73P03FMB24	GO:0005515	GO:0005576	GO:0009055
2.0_INSECT_GG3J73P03FMBW1	GO:0009055	GO:0005576	GO:0008152	GO:0016747	GO:0004252	GO:0006508	GO:0005525	GO:0005874	GO:0007017	GO:0005515	GO:0006952	GO:0051536	GO:0004872	GO:0005488	GO:0007155	GO:0007160	GO:0007229	GO:0008305	GO:0016068
2.0_INSECT_GG3J73P03FMCA0	GO:0008152	GO:0016747	GO:0009055	GO:0005515	GO:0005576	GO:0006952	GO:0051536
2.0_INSECT_GG3J73P03FMCJ1	GO:0008152	GO:0016747	GO:0009055	GO:0051536	GO:0005576	GO:0005515	GO:0004872	GO:0005488	GO:0007155	GO:0007160	GO:0007229	GO:0008305	GO:0005525	GO:0005874	GO:0007017	GO:0016068	GO:0005199	GO:0009277	GO:0006952
2.0_INSECT_GG3J73P03FMD03	GO:0009055	GO:0051536	GO:0004872	GO:0005488	GO:0007155	GO:0007160	GO:0007229	GO:0008305	GO:0005576	GO:0006952	GO:0005515	GO:0008152	GO:0016747
2.0_INSECT_GG3J73P03FMD3V	GO:0005576	GO:0009055	GO:0005515	GO:0051536	GO:0004872	GO:0005488	GO:0007155	GO:0007160	GO:0007229	GO:0008305	GO:0006952	GO:0009755	GO:0008152	GO:0016747	GO:0042309	GO:0050825	GO:0050826	GO:0005525	GO:0005874	GO:0007017	GO:0001558	GO:0005520
2.0_INSECT_GG3J73P03FMD4Y	GO:0009055
2.0_INSECT_GG3J73P03FMD6N	GO:0008152	GO:0016747	GO:0009055	GO:0005576	GO:0006952	GO:0005515	GO:0051536	GO:0004872	GO:0005488	GO:0007155	GO:0007160	GO:0007229	GO:0008305	GO:0009755
2.0_INSECT_GG3J73P03FMD6Z	GO:0009055	GO:0004872	GO:0005488	GO:0007155	GO:0007160	GO:0007229	GO:0008305	GO:0005576	GO:0006952	GO:0005515	GO:0005525	GO:0005874	GO:0007017	GO:0008152	GO:0016747	GO:0051536
2.0_INSECT_GG3J73P03FMDQH	GO:0009055	GO:0008152	GO:0016747	GO:0005515	GO:0004872	GO:0005488	GO:0007155	GO:0007160	GO:0007229	GO:0008305	GO:0005576	GO:0016068	GO:0006952	GO:0051536
2.0_INSECT_GG3J73P03FMEI8	GO:0009055	GO:0005576	GO:0005515	GO:0005525	GO:0005874	GO:0007017	GO:0008152	GO:0016747	GO:0006952	GO:0016068
2.0_INSECT_GG3J73P03FMEM4	GO:0009055	GO:0005576	GO:0006952	GO:0005515	GO:0051536	GO:0004872	GO:0005488	GO:0007155	GO:0007160	GO:0007229	GO:0008305	GO:0008152	GO:0016747	GO:0005525	GO:0005874	GO:0007017
2.0_INSECT_GG3J73P03FMF6R	GO:0008152	GO:0016747	GO:0009055	GO:0005576	GO:0006952	GO:0005515	GO:0051536	GO:0004872	GO:0005488	GO:0007155	GO:0007160	GO:0007229	GO:0008305	GO:0016068
2.0_INSECT_GG3J73P03FMFF2	GO:0009055
2.0_INSECT_GG3J73P03FMFU1	GO:0009055	GO:0005576	GO:0006952	GO:0005515	GO:0008152	GO:0016747	GO:0051536
2.0_INSECT_GG3J73P03FMFUT	GO:0009055	GO:0051536	GO:0004872	GO:0005488	GO:0007155	GO:0007160	GO:0007229	GO:0008305	GO:0005515	GO:0001558	GO:0005520	GO:0005576	GO:0008152	GO:0016747	GO:0006952	GO:0016068
2.0_INSECT_GG3J73P03FMIAA	GO:0009055	GO:0005576	GO:0006952	GO:0005199	GO:0009277	GO:0005515	GO:0008152	GO:0016747	GO:0051536	GO:0005525	GO:0005874	GO:0007017	GO:0004872	GO:0005488	GO:0007155	GO:0007160	GO:0007229	GO:0008305
2.0_INSECT_GG3J73P03FMIIL	GO:0004872	GO:0005515	GO:0008152	GO:0016747	GO:0009055	GO:0051536	GO:0005488	GO:0007155	GO:0007160	GO:0007229	GO:0008305	GO:0005576	GO:0005525	GO:0005874	GO:0007017
2.0_INSECT_GG3J73P03FMIW5	GO:0009055	GO:0005576	GO:0006952	GO:0005515	GO:0008152	GO:0016747	GO:0051536	GO:0004872	GO:0005488	GO:0007155	GO:0007160	GO:0007229	GO:0008305
2.0_INSECT_GG3J73P03FMJYN	GO:0008152	GO:0016747	GO:0009055	GO:0005576
2.0_INSECT_GG3J73P03FMKY0	GO:0009055
2.0_INSECT_GG3J73P03FMLI9	GO:0005515	GO:0008152	GO:0016747	GO:0009055
2.0_INSECT_GG3J73P03FMLLE	GO:0005576	GO:0008152	GO:0016747	GO:0009055	GO:0005515	GO:0051536	GO:0016068	GO:0004872	GO:0005488	GO:0007155	GO:0007160	GO:0007229	GO:0008305	GO:0006952	GO:0005199	GO:0009277	GO:0005525	GO:0005874	GO:0007017	GO:0004252	GO:0006508
2.0_INSECT_GG3J73P03FMLSL	GO:0008152	GO:0016747	GO:0005576	GO:0009055	GO:0005515	GO:0046872	GO:0005525	GO:0005874	GO:0007017	GO:0051536	GO:0006952	GO:0016068
2.0_INSECT_GG3J73P03FMM5G	GO:0009055	GO:0051536	GO:0005576	GO:0005515	GO:0006952	GO:0005199	GO:0009277	GO:0008152	GO:0016747	GO:0005525	GO:0005874	GO:0007017	GO:0004872	GO:0005488	GO:0007155	GO:0007160	GO:0007229	GO:0008305	GO:0042309	GO:0050825	GO:0050826
2.0_INSECT_GG3J73P03FMMBJ	GO:0009055	GO:0051536	GO:0005576	GO:0005515
2.0_INSECT_GG3J73P03FMMED	GO:0009055	GO:0004872	GO:0005488	GO:0007155	GO:0007160	GO:0007229	GO:0008305	GO:0005576	GO:0005515	GO:0051536	GO:0008152	GO:0016747	GO:0005525	GO:0005874	GO:0007017	GO:0004252	GO:0006508
2.0_INSECT_GG3J73P03FMMG6	GO:0009055	GO:0005515
2.0_INSECT_GG3J73P03FMMND	GO:0008152	GO:0016747	GO:0009055	GO:0051536	GO:0005515	GO:0005576	GO:0004872	GO:0005488	GO:0007155	GO:0007160	GO:0007229	GO:0008305	GO:0006952	GO:0016068	GO:0005199	GO:0009277	GO:0005525	GO:0005874	GO:0007017	GO:0009755
2.0_INSECT_GG3J73P03FMNB3	GO:0005199	GO:0009277	GO:0005576	GO:0005515	GO:0008152	GO:0016747	GO:0009055	GO:0004872	GO:0005488	GO:0007155	GO:0007160	GO:0007229	GO:0008305	GO:0006952	GO:0005525	GO:0005874	GO:0007017	GO:0051536
2.0_INSECT_GG3J73P03FMNJA	GO:0009055	GO:0051536	GO:0005576	GO:0005515	GO:0004872	GO:0005488	GO:0007155	GO:0007160	GO:0007229	GO:0008305	GO:0008152	GO:0016747
2.0_INSECT_GG3J73P03FMOJJ	GO:0005576
2.0_INSECT_GG3J73P03FMQGT	GO:0009055	GO:0008152	GO:0016747	GO:0005576	GO:0005515	GO:0005199	GO:0009277	GO:0051536	GO:0005525	GO:0005874	GO:0007017	GO:0006952	GO:0004872	GO:0005488	GO:0007155	GO:0007160	GO:0007229	GO:0008305
2.0_INSECT_GG3J73P03FMR5G	GO:0008152	GO:0016747	GO:0009055	GO:0005515
2.0_INSECT_GG3J73P03FMRBQ	GO:0009055	GO:0005576	GO:0005515	GO:0051536	GO:0008152	GO:0016747	GO:0006952	GO:0004872	GO:0005488	GO:0007155	GO:0007160	GO:0007229	GO:0008305
2.0_INSECT_GG3J73P03FMRN6	GO:0009055
2.0_INSECT_GG3J73P03FMROH	GO:0009055	GO:0005525	GO:0005874	GO:0007017	GO:0008152	GO:0016747	GO:0005515	GO:0046872	GO:0004872	GO:0005488	GO:0007155	GO:0007160	GO:0007229	GO:0008305	GO:0005576	GO:0006952
2.0_INSECT_GG3J73P03FMRP4	GO:0009055	GO:0051536	GO:0005515	GO:0008152	GO:0016747	GO:0005576	GO:0004872	GO:0005488	GO:0007155	GO:0007160	GO:0007229	GO:0008305	GO:0006952
2.0_INSECT_GG3J73P03FMSOI	GO:0005515	GO:0008152	GO:0016747	GO:0005576	GO:0006952	GO:0009055	GO:0051536	GO:0004872	GO:0005488	GO:0007155	GO:0007160	GO:0007229	GO:0008305	GO:0016068	GO:0042309	GO:0050825	GO:0050826
2.0_INSECT_GG3J73P03FMTN4	GO:0008152	GO:0016747	GO:0009055	GO:0005515
2.0_INSECT_GG3J73P03FMU5D	GO:0009055
2.0_INSECT_GG3J73P03FMV4G	GO:0005576	GO:0006952	GO:0005515	GO:0009055	GO:0051536	GO:0008152	GO:0016747	GO:0004872	GO:0005488	GO:0007155	GO:0007160	GO:0007229	GO:0008305	GO:0005525	GO:0005874	GO:0007017	GO:0016068
2.0_INSECT_GG3J73P03FMVU3	GO:0008152	GO:0016747	GO:0005576	GO:0006952	GO:0005515	GO:0016068	GO:0009055	GO:0004872	GO:0005488	GO:0007155	GO:0007160	GO:0007229	GO:0008305	GO:0051536	GO:0005525	GO:0005874	GO:0007017
2.0_INSECT_GG3J73P03FMVZP	GO:0009055	GO:0005576	GO:0005515	GO:0005525	GO:0005874	GO:0007017
2.0_INSECT_GG3J73P03FMVZT	GO:0009055	GO:0005576	GO:0005515	GO:0051536	GO:0008152	GO:0016747	GO:0005525	GO:0005874	GO:0007017	GO:0004872	GO:0005488	GO:0007155	GO:0007160	GO:0007229	GO:0008305	GO:0006952
2.0_INSECT_GG3J73P03FMXDU	GO:0009055	GO:0051536	GO:0005576	GO:0005515	GO:0008152	GO:0016747	GO:0006952
2.0_INSECT_GG3J73P03FMXHJ	GO:0009055	GO:0005576	GO:0005515	GO:0008152	GO:0016747	GO:0051536	GO:0005525	GO:0005874	GO:0007017	GO:0006952	GO:0004872	GO:0005488	GO:0007155	GO:0007160	GO:0007229	GO:0008305	GO:0016068	GO:0046872	GO:0009755	GO:0009405
2.0_INSECT_GG3J73P03FMXKH	GO:0009055	GO:0005576	GO:0005515	GO:0008152	GO:0016747	GO:0004872	GO:0005488	GO:0007155	GO:0007160	GO:0007229	GO:0008305	GO:0051536	GO:0005525	GO:0005874	GO:0007017
2.0_INSECT_GG3J73P03FMXXS	GO:0009055	GO:0004872	GO:0005488	GO:0007155	GO:0007160	GO:0007229	GO:0008305	GO:0005515	GO:0008152	GO:0016747	GO:0005576	GO:0016068	GO:0051536	GO:0005525	GO:0005874	GO:0007017
2.0_INSECT_GG3J73P03FMY3Y	GO:0009055	GO:0005525	GO:0005874	GO:0007017	GO:0016068	GO:0051536	GO:0005515	GO:0005576	GO:0006952	GO:0009755	GO:0008152	GO:0016747	GO:0004872	GO:0005488	GO:0007155	GO:0007160	GO:0007229	GO:0008305
2.0_INSECT_GG3J73P03FMY9B	GO:0009055	GO:0005515	GO:0005199	GO:0009277	GO:0005576	GO:0008152	GO:0016747	GO:0051536	GO:0006952	GO:0004872	GO:0005488	GO:0007155	GO:0007160	GO:0007229	GO:0008305	GO:0005525	GO:0005874	GO:0007017
2.0_INSECT_GG3J73P03FMYMM	GO:0009055	GO:0008152	GO:0016747	GO:0005515	GO:0051536	GO:0004872	GO:0005488	GO:0007155	GO:0007160	GO:0007229	GO:0008305	GO:0005576	GO:0006952	GO:0005525	GO:0005874	GO:0007017
2.0_INSECT_GG3J73P03FMYNF	GO:0009055	GO:0051536	GO:0005576	GO:0005515
2.0_INSECT_GG3J73P03FMZXI	GO:0009055
2.0_INSECT_GG3J73P03FMZXM	GO:0009055	GO:0051536	GO:0005576	GO:0005515	GO:0006952	GO:0008152	GO:0016747	GO:0004872	GO:0005488	GO:0007155	GO:0007160	GO:0007229	GO:0008305
2.0_INSECT_GG3J73P03FN0R2	GO:0008152	GO:0016747
2.0_INSECT_GG3J73P03FN23P	GO:0005576	GO:0005515	GO:0009055	GO:0051536	GO:0005525	GO:0005874	GO:0007017	GO:0004872	GO:0005488	GO:0007155	GO:0007160	GO:0007229	GO:0008305	GO:0006952	GO:0008152	GO:0016747	GO:0016068
2.0_INSECT_GG3J73P03FN2NY	GO:0009055	GO:0008152	GO:0016747	GO:0005576	GO:0006952	GO:0005515
2.0_INSECT_GG3J73P03FN31R	GO:0009055	GO:0005576	GO:0006952	GO:0005515	GO:0008152	GO:0016747	GO:0051536	GO:0004872	GO:0005488	GO:0007155	GO:0007160	GO:0007229	GO:0008305	GO:0005525	GO:0005874	GO:0007017
2.0_INSECT_GG3J73P03FN38A	GO:0009055	GO:0005576	GO:0008152	GO:0016747	GO:0005515
2.0_INSECT_GG3J73P03FN3RB	GO:0009055	GO:0005515	GO:0008152	GO:0016747	GO:0005199	GO:0009277	GO:0005576	GO:0051536	GO:0006952	GO:0005525	GO:0005874	GO:0007017	GO:0004872	GO:0005488	GO:0007155	GO:0007160	GO:0007229	GO:0008305
2.0_INSECT_GG3J73P03FN3UG	GO:0008152	GO:0016747	GO:0009055
2.0_INSECT_GG3J73P03FN43W	GO:0009055	GO:0005515	GO:0008152	GO:0016747	GO:0005525	GO:0005874	GO:0007017	GO:0005576
2.0_INSECT_GG3J73P03FN4BH	GO:0005576	GO:0005515	GO:0008152	GO:0016747
2.0_INSECT_GG3J73P03FN6ZO	GO:0009055	GO:0005515
2.0_INSECT_GG3J73P03FN6ZX	GO:0009055	GO:0005576	GO:0005515	GO:0008152	GO:0016747	GO:0051536	GO:0006952	GO:0004872	GO:0005488	GO:0007155	GO:0007160	GO:0007229	GO:0008305
2.0_INSECT_GG3J73P03FN72A	GO:0009055	GO:0051536
2.0_INSECT_GG3J73P03FN907	GO:0008152	GO:0016747	GO:0009055	GO:0005576	GO:0005515	GO:0051536	GO:0005525	GO:0005874	GO:0007017	GO:0004872	GO:0005488	GO:0007155	GO:0007160	GO:0007229	GO:0008305	GO:0006952
2.0_INSECT_GG3J73P03FN964	GO:0008152	GO:0016747	GO:0009055	GO:0005525	GO:0005874	GO:0007017	GO:0005515	GO:0005576	GO:0004872	GO:0005488	GO:0007155	GO:0007160	GO:0007229	GO:0008305	GO:0006952	GO:0051536
2.0_INSECT_GG3J73P03FN9L0	GO:0009055	GO:0051536	GO:0005576	GO:0006952	GO:0005515
2.0_INSECT_GG3J73P03FN9YU	GO:0008152	GO:0016747	GO:0005515	GO:0009055	GO:0051536	GO:0004872	GO:0005488	GO:0007155	GO:0007160	GO:0007229	GO:0008305	GO:0005576	GO:0006952	GO:0016068	GO:0009755	GO:0005525	GO:0005874	GO:0007017
2.0_INSECT_GG3J73P03FNAGR	GO:0005515	GO:0009055	GO:0008152	GO:0016747	GO:0005576	GO:0051536	GO:0004872	GO:0005488	GO:0007155	GO:0007160	GO:0007229	GO:0008305	GO:0006952
2.0_INSECT_GG3J73P03FNAOU	GO:0008152	GO:0016747	GO:0005515	GO:0009055	GO:0004872	GO:0005488	GO:0007155	GO:0007160	GO:0007229	GO:0008305	GO:0005576	GO:0006952	GO:0005525	GO:0005874	GO:0007017	GO:0051536
2.0_INSECT_GG3J73P03FNARX	GO:0008152	GO:0016747	GO:0009055	GO:0005515	GO:0005525	GO:0005874	GO:0007017	GO:0004872	GO:0005488	GO:0007155	GO:0007160	GO:0007229	GO:0008305	GO:0005576	GO:0006952	GO:0051536
2.0_INSECT_GG3J73P03FNBG2	GO:0009055	GO:0008152	GO:0016747	GO:0005515	GO:0005576	GO:0051536	GO:0004872	GO:0005488	GO:0007155	GO:0007160	GO:0007229	GO:0008305	GO:0016068	GO:0006952	GO:0046872	GO:0009755
2.0_INSECT_GG3J73P03FNC0D	GO:0009055	GO:0051536	GO:0005576	GO:0005515	GO:0008152	GO:0016747
2.0_INSECT_GG3J73P03FND8G	GO:0009055	GO:0051536	GO:0005199	GO:0009277	GO:0005576	GO:0005515	GO:0008152	GO:0016747	GO:0004872	GO:0005488	GO:0007155	GO:0007160	GO:0007229	GO:0008305	GO:0006952
2.0_INSECT_GG3J73P03FNDE2	GO:0009055	GO:0005515
2.0_INSECT_GG3J73P03FNDML	GO:0009055	GO:0005525	GO:0005874	GO:0007017	GO:0005576	GO:0006952
2.0_INSECT_GG3J73P03FNDTN	GO:0009055	GO:0008152	GO:0016747
2.0_INSECT_GG3J73P03FNEBJ	GO:0008152	GO:0016747	GO:0009055	GO:0005576	GO:0005525	GO:0005874	GO:0007017	GO:0051536	GO:0005515
2.0_INSECT_GG3J73P03FNG4B	GO:0009055	GO:0051536	GO:0005576	GO:0005515	GO:0008152	GO:0016747	GO:0006952	GO:0004872	GO:0005488	GO:0007155	GO:0007160	GO:0007229	GO:0008305	GO:0016068	GO:0005525	GO:0005874	GO:0007017
2.0_INSECT_GG3J73P03FNG67	GO:0008152	GO:0016747	GO:0009055	GO:0005515	GO:0005576	GO:0051536	GO:0004872	GO:0005488	GO:0007155	GO:0007160	GO:0007229	GO:0008305	GO:0005525	GO:0005874	GO:0007017	GO:0046872	GO:0006952
2.0_INSECT_GG3J73P03FNGMN	GO:0005576	GO:0005515	GO:0009055	GO:0051536	GO:0008152	GO:0016747	GO:0005525	GO:0005874	GO:0007017	GO:0004872	GO:0005488	GO:0007155	GO:0007160	GO:0007229	GO:0008305	GO:0006952
2.0_INSECT_GG3J73P03FNGSQ	GO:0009055	GO:0005515	GO:0008152	GO:0016747	GO:0051536	GO:0004872	GO:0005488	GO:0007155	GO:0007160	GO:0007229	GO:0008305	GO:0005576	GO:0006952
2.0_INSECT_GG3J73P03FNGU7	GO:0009055
2.0_INSECT_GG3J73P03FNGWE	GO:0009055	GO:0005576	GO:0005515	GO:0051536	GO:0004872	GO:0005488	GO:0007155	GO:0007160	GO:0007229	GO:0008305	GO:0006952	GO:0008152	GO:0016747	GO:0016068	GO:0005525	GO:0005874	GO:0007017
2.0_INSECT_GG3J73P03FNH11	GO:0009055	GO:0051536	GO:0004872	GO:0005488	GO:0007155	GO:0007160	GO:0007229	GO:0008305	GO:0005576	GO:0006952	GO:0005515	GO:0008152	GO:0016747	GO:0005525	GO:0005874	GO:0007017	GO:0016068
2.0_INSECT_GG3J73P03FNHYJ	GO:0005576	GO:0009055	GO:0005525	GO:0005874	GO:0007017	GO:0004872	GO:0005488	GO:0007155	GO:0007160	GO:0007229	GO:0008305	GO:0051536	GO:0005515	GO:0008152	GO:0016747	GO:0006952
2.0_INSECT_GG3J73P03FNI5K	GO:0005576	GO:0008152	GO:0016747	GO:0009055	GO:0051536
2.0_INSECT_GG3J73P03FNJ9O	GO:0009055	GO:0005576
2.0_INSECT_GG3J73P03FNJF2	GO:0008152	GO:0016747	GO:0009055	GO:0005576	GO:0005525	GO:0005874	GO:0007017	GO:0005515	GO:0006952	GO:0051536	GO:0004872	GO:0005488	GO:0007155	GO:0007160	GO:0007229	GO:0008305	GO:0009755
2.0_INSECT_GG3J73P03FNJZ3	GO:0009055	GO:0005576	GO:0005515	GO:0051536	GO:0008152	GO:0016747	GO:0016068	GO:0004872	GO:0005488	GO:0007155	GO:0007160	GO:0007229	GO:0008305
2.0_INSECT_GG3J73P03FNJZL	GO:0005525	GO:0005874	GO:0007017	GO:0005576	GO:0006952	GO:0005515	GO:0009055
2.0_INSECT_GG3J73P03FNK7D	GO:0008152	GO:0016747	GO:0005576	GO:0009055
2.0_INSECT_GG3J73P03FNKN3	GO:0009055	GO:0051536	GO:0005515	GO:0008152	GO:0016747	GO:0005576	GO:0006952	GO:0004872	GO:0005488	GO:0007155	GO:0007160	GO:0007229	GO:0008305	GO:0046872	GO:0001558	GO:0005520
2.0_INSECT_GG3J73P03FNKX7	GO:0008152	GO:0016747	GO:0009055	GO:0004872	GO:0005488	GO:0007155	GO:0007160	GO:0007229	GO:0008305	GO:0005576	GO:0005515
2.0_INSECT_GG3J73P03FNL34	GO:0008152	GO:0016747	GO:0009055	GO:0005515	GO:0005576	GO:0006952	GO:0051536	GO:0005525	GO:0005874	GO:0007017	GO:0004872	GO:0005488	GO:0007155	GO:0007160	GO:0007229	GO:0008305
2.0_INSECT_GG3J73P03FNLW2	GO:0008152	GO:0016747	GO:0009055	GO:0005515	GO:0005576	GO:0004872	GO:0005488	GO:0007155	GO:0007160	GO:0007229	GO:0008305	GO:0051536	GO:0006952
2.0_INSECT_GG3J73P03FNM3L	GO:0009055	GO:0051536	GO:0004872	GO:0005488	GO:0007155	GO:0007160	GO:0007229	GO:0008305	GO:0005576	GO:0005515	GO:0008152	GO:0016747
2.0_INSECT_GG3J73P03FNM74	GO:0009055	GO:0005525	GO:0005874	GO:0007017	GO:0005515	GO:0005199	GO:0009277	GO:0005576	GO:0008152	GO:0016747	GO:0006952	GO:0009405	GO:0051536	GO:0004872	GO:0005488	GO:0007155	GO:0007160	GO:0007229	GO:0008305
2.0_INSECT_GG3J73P03FNMKC	GO:0005515	GO:0009055	GO:0005576
2.0_INSECT_GG3J73P03FNMT4	GO:0008152	GO:0016747	GO:0009055	GO:0005576
2.0_INSECT_GG3J73P03FNMWR	GO:0008152	GO:0016747
2.0_INSECT_GG3J73P03FNMX7	GO:0008152	GO:0016747	GO:0009055	GO:0005576	GO:0005515	GO:0004872	GO:0005488	GO:0007155	GO:0007160	GO:0007229	GO:0008305	GO:0006952	GO:0001558	GO:0005520	GO:0005525	GO:0005874	GO:0007017	GO:0016068	GO:0051536	GO:0009755	GO:0046872
2.0_INSECT_GG3J73P03FNNED	GO:0009055	GO:0051536	GO:0004872	GO:0005488	GO:0007155	GO:0007160	GO:0007229	GO:0008305	GO:0005576	GO:0005515	GO:0008152	GO:0016747	GO:0006952
2.0_INSECT_GG3J73P03FNNKM	GO:0009055
2.0_INSECT_GG3J73P03FNNYY	GO:0005515	GO:0008152	GO:0016747	GO:0009055	GO:0051536	GO:0005525	GO:0005874	GO:0007017	GO:0004872	GO:0005488	GO:0007155	GO:0007160	GO:0007229	GO:0008305	GO:0005576
2.0_INSECT_GG3J73P03FNO62	GO:0005576	GO:0005515	GO:0009055	GO:0008152	GO:0016747
2.0_INSECT_GG3J73P03FNPRY	GO:0008152	GO:0016747	GO:0005576
2.0_INSECT_GG3J73P03FNQ5M	GO:0008152	GO:0016747	GO:0009055	GO:0005515	GO:0051536	GO:0005576	GO:0005525	GO:0005874	GO:0007017	GO:0006952	GO:0004872	GO:0005488	GO:0007155	GO:0007160	GO:0007229	GO:0008305	GO:0046872	GO:0004252	GO:0006508
2.0_INSECT_GG3J73P03FNQE3	GO:0009055	GO:0005576	GO:0005515	GO:0008152	GO:0016747	GO:0005525	GO:0005874	GO:0007017	GO:0051536	GO:0004872	GO:0005488	GO:0007155	GO:0007160	GO:0007229	GO:0008305	GO:0009405	GO:0006952
2.0_INSECT_GG3J73P03FNQK8	GO:0005199	GO:0009277	GO:0009055	GO:0005525	GO:0005874	GO:0007017	GO:0005515	GO:0051536	GO:0004872	GO:0005488	GO:0007155	GO:0007160	GO:0007229	GO:0008305	GO:0005576	GO:0008152	GO:0016747	GO:0006952	GO:0009755
2.0_INSECT_GG3J73P03FNQSK	GO:0009055	GO:0004872	GO:0005488	GO:0007155	GO:0007160	GO:0007229	GO:0008305
2.0_INSECT_GG3J73P03FNRQJ	GO:0008152	GO:0016747	GO:0005576	GO:0005515
2.0_INSECT_GG3J73P03FNS6V	GO:0005515	GO:0009055	GO:0051536	GO:0005576	GO:0008152	GO:0016747	GO:0005525	GO:0005874	GO:0007017
2.0_INSECT_GG3J73P03FNT2E	GO:0009055	GO:0005515	GO:0051536	GO:0008152	GO:0016747	GO:0005576	GO:0006952	GO:0005525	GO:0005874	GO:0007017
2.0_INSECT_GG3J73P03FNTEU	GO:0009055	GO:0051536	GO:0005515	GO:0004872	GO:0005488	GO:0007155	GO:0007160	GO:0007229	GO:0008305	GO:0008152	GO:0016747	GO:0005576	GO:0006952
2.0_INSECT_GG3J73P03FNTVQ	GO:0008152	GO:0016747	GO:0009055	GO:0005515	GO:0005576	GO:0005525	GO:0005874	GO:0007017	GO:0004872	GO:0005488	GO:0007155	GO:0007160	GO:0007229	GO:0008305	GO:0051536	GO:0006952	GO:0009755
2.0_INSECT_GG3J73P03FNUEC	GO:0005515	GO:0008152	GO:0016747	GO:0009055	GO:0051536	GO:0005525	GO:0005874	GO:0007017	GO:0004872	GO:0005488	GO:0007155	GO:0007160	GO:0007229	GO:0008305	GO:0005576	GO:0016068	GO:0005199	GO:0009277
2.0_INSECT_GG3J73P03FNULY	GO:0009055	GO:0051536	GO:0005515	GO:0005576	GO:0004872	GO:0005488	GO:0007155	GO:0007160	GO:0007229	GO:0008305	GO:0008152	GO:0016747	GO:0006952
2.0_INSECT_GG3J73P03FNUT5	GO:0008152	GO:0016747	GO:0005576	GO:0006952	GO:0005515
2.0_INSECT_GG3J73P03FNVD6	GO:0009055	GO:0051536	GO:0005576	GO:0006952	GO:0005515
2.0_INSECT_GG3J73P03FNVOJ	GO:0009055
2.0_INSECT_GG3J73P03FNWD7	GO:0008152	GO:0016747	GO:0009055	GO:0051536	GO:0005199	GO:0009277	GO:0005515	GO:0004872	GO:0005488	GO:0007155	GO:0007160	GO:0007229	GO:0008305	GO:0005576	GO:0009755
2.0_INSECT_GG3J73P03FNWLT	GO:0005576	GO:0005515	GO:0009055	GO:0051536	GO:0008152	GO:0016747	GO:0005525	GO:0005874	GO:0007017	GO:0004872	GO:0005488	GO:0007155	GO:0007160	GO:0007229	GO:0008305	GO:0006952
2.0_INSECT_GG3J73P03FNWM9	GO:0009055	GO:0051536	GO:0004872	GO:0005488	GO:0007155	GO:0007160	GO:0007229	GO:0008305	GO:0005515	GO:0005576	GO:0009755
2.0_INSECT_GG3J73P03FNXBB	GO:0009055	GO:0051536	GO:0005576	GO:0006952	GO:0005515
2.0_INSECT_GG3J73P03FNXMC	GO:0004872	GO:0005488	GO:0007155	GO:0007160	GO:0007229	GO:0008305	GO:0005515	GO:0009055	GO:0051536	GO:0005576
2.0_INSECT_GG3J73P03FNXVU	GO:0008152	GO:0016747	GO:0004872	GO:0005488	GO:0007155	GO:0007160	GO:0007229	GO:0008305	GO:0009055	GO:0005576	GO:0005515
2.0_INSECT_GG3J73P03FNYM5	GO:0008152	GO:0016747	GO:0009055	GO:0051536	GO:0004872	GO:0005488	GO:0007155	GO:0007160	GO:0007229	GO:0008305	GO:0005515	GO:0005576	GO:0006952
2.0_INSECT_GG3J73P03FNZ5A	GO:0008152	GO:0016747
2.0_INSECT_GG3J73P03FNZPK	GO:0009055	GO:0005515	GO:0008152	GO:0016747	GO:0005525	GO:0005874	GO:0007017	GO:0004872	GO:0005488	GO:0007155	GO:0007160	GO:0007229	GO:0008305	GO:0005576	GO:0051536	GO:0006952
2.0_INSECT_GG3J73P03FNZVW	GO:0005576	GO:0006952	GO:0005515	GO:0008152	GO:0016747	GO:0005199	GO:0009277	GO:0009055
2.0_INSECT_GG3J73P03FO0PL	GO:0009055
2.0_INSECT_GG3J73P03FO10K	GO:0009055	GO:0005576	GO:0005515
2.0_INSECT_GG3J73P03FO1M8	GO:0009055	GO:0051536	GO:0005515
2.0_INSECT_GG3J73P03FO1OC	GO:0009055	GO:0005576	GO:0005515	GO:0008152	GO:0016747	GO:0005525	GO:0005874	GO:0007017	GO:0004872	GO:0005488	GO:0007155	GO:0007160	GO:0007229	GO:0008305	GO:0006952	GO:0051536	GO:0009405
2.0_INSECT_GG3J73P03FO21D	GO:0008152	GO:0016747	GO:0009055	GO:0005199	GO:0009277	GO:0005515
2.0_INSECT_GG3J73P03FO243	GO:0009055	GO:0005576
2.0_INSECT_GG3J73P03FO2J5	GO:0008152	GO:0016747	GO:0009055	GO:0004872	GO:0005488	GO:0007155	GO:0007160	GO:0007229	GO:0008305	GO:0005576	GO:0005515
2.0_INSECT_GG3J73P03FO2XE	GO:0009055	GO:0005515	GO:0051536	GO:0005576	GO:0006952	GO:0008152	GO:0016747	GO:0004872	GO:0005488	GO:0007155	GO:0007160	GO:0007229	GO:0008305
2.0_INSECT_GG3J73P03FO365	GO:0016068	GO:0008152	GO:0016747	GO:0005576	GO:0005515	GO:0046872	GO:0009055
2.0_INSECT_GG3J73P03FO3YP	GO:0009055	GO:0005576	GO:0005515	GO:0051536	GO:0006952
2.0_INSECT_GG3J73P03FO4F3	GO:0009055	GO:0005576	GO:0006952	GO:0005515	GO:0008152	GO:0016747	GO:0042309	GO:0050825	GO:0050826	GO:0051536	GO:0004872	GO:0005488	GO:0007155	GO:0007160	GO:0007229	GO:0008305
2.0_INSECT_GG3J73P03FO4PU	GO:0009055	GO:0051536
2.0_INSECT_GG3J73P03FO4WB	GO:0008152	GO:0016747	GO:0009055	GO:0005576	GO:0005515	GO:0005525	GO:0005874	GO:0007017	GO:0051536	GO:0006952
2.0_INSECT_GG3J73P03FO62E	GO:0009055	GO:0005515	GO:0008152	GO:0016747
2.0_INSECT_GG3J73P03FO66Z	GO:0009055	GO:0051536	GO:0004872	GO:0005488	GO:0007155	GO:0007160	GO:0007229	GO:0008305	GO:0005576	GO:0006952	GO:0005515	GO:0008152	GO:0016747	GO:0016068
2.0_INSECT_GG3J73P03FO73O	GO:0005515	GO:0009055	GO:0004872	GO:0005488	GO:0007155	GO:0007160	GO:0007229	GO:0008305	GO:0008152	GO:0016747	GO:0005576	GO:0006952	GO:0051536
2.0_INSECT_GG3J73P03FO743	GO:0009055	GO:0005515	GO:0005525	GO:0005874	GO:0007017	GO:0005576
2.0_INSECT_GG3J73P03FO77A	GO:0005576	GO:0009055
2.0_INSECT_GG3J73P03FO7GF	GO:0009055	GO:0005576	GO:0005515	GO:0008152	GO:0016747	GO:0016068	GO:0051536	GO:0006952	GO:0009755	GO:0004872	GO:0005488	GO:0007155	GO:0007160	GO:0007229	GO:0008305
2.0_INSECT_GG3J73P03FO8OG	GO:0009055	GO:0004872	GO:0005488	GO:0007155	GO:0007160	GO:0007229	GO:0008305	GO:0005576	GO:0005515	GO:0008152	GO:0016747	GO:0051536	GO:0006952
2.0_INSECT_GG3J73P03FO8VU	GO:0005515	GO:0008152	GO:0016747	GO:0009055	GO:0051536	GO:0005576	GO:0004252	GO:0006508	GO:0004872	GO:0005488	GO:0007155	GO:0007160	GO:0007229	GO:0008305	GO:0006952	GO:0005525	GO:0005874	GO:0007017
2.0_INSECT_GG3J73P03FO95P	GO:0009055	GO:0005515	GO:0008152	GO:0016747	GO:0005576	GO:0051536	GO:0004872	GO:0005488	GO:0007155	GO:0007160	GO:0007229	GO:0008305	GO:0005525	GO:0005874	GO:0007017	GO:0006952	GO:0016068
2.0_INSECT_GG3J73P03FOALZ	GO:0009055	GO:0005515	GO:0005576	GO:0006952	GO:0051536	GO:0008152	GO:0016747	GO:0046872	GO:0005525	GO:0005874	GO:0007017	GO:0004872	GO:0005488	GO:0007155	GO:0007160	GO:0007229	GO:0008305
2.0_INSECT_GG3J73P03FOANQ	GO:0009055	GO:0008152	GO:0016747	GO:0051536	GO:0005515	GO:0005525	GO:0005874	GO:0007017	GO:0004872	GO:0005488	GO:0007155	GO:0007160	GO:0007229	GO:0008305	GO:0005576	GO:0006952	GO:0009755	GO:0001558	GO:0005520
2.0_INSECT_GG3J73P03FOAO1	GO:0008152	GO:0016747	GO:0009055	GO:0005525	GO:0005874	GO:0007017	GO:0005515	GO:0005576	GO:0004872	GO:0005488	GO:0007155	GO:0007160	GO:0007229	GO:0008305	GO:0051536
2.0_INSECT_GG3J73P03FOBQ8	GO:0008152	GO:0016747	GO:0009055	GO:0051536	GO:0005576	GO:0005515
2.0_INSECT_GG3J73P03FOEGE	GO:0005515
2.0_INSECT_GG3J73P03FOF00	GO:0005515	GO:0016068	GO:0009055	GO:0008152	GO:0016747	GO:0005576	GO:0006952	GO:0005525	GO:0005874	GO:0007017	GO:0051536	GO:0004872	GO:0005488	GO:0007155	GO:0007160	GO:0007229	GO:0008305
2.0_INSECT_GG3J73P03FOFGT	GO:0009055	GO:0051536	GO:0005576	GO:0005525	GO:0005874	GO:0007017	GO:0005515
2.0_INSECT_GG3J73P03FOFIU	GO:0009055	GO:0004872	GO:0005488	GO:0007155	GO:0007160	GO:0007229	GO:0008305	GO:0005515	GO:0005576	GO:0008152	GO:0016747	GO:0051536	GO:0005525	GO:0005874	GO:0007017	GO:0006952
2.0_INSECT_GG3J73P03FOFKT	GO:0009055	GO:0005515
2.0_INSECT_GG3J73P03FOGFP	GO:0009055	GO:0005576	GO:0005515	GO:0008152	GO:0016747	GO:0006952	GO:0005525	GO:0005874	GO:0007017	GO:0005199	GO:0009277	GO:0051536	GO:0042309	GO:0050825	GO:0050826	GO:0004872	GO:0005488	GO:0007155	GO:0007160	GO:0007229	GO:0008305
2.0_INSECT_GG3J73P03FOHWN	GO:0009055	GO:0005515	GO:0005576	GO:0006952	GO:0004872	GO:0005488	GO:0007155	GO:0007160	GO:0007229	GO:0008305	GO:0008152	GO:0016747	GO:0051536	GO:0016068
2.0_INSECT_GG3J73P03FOHYK	GO:0009055	GO:0005576	GO:0005515	GO:0004872	GO:0005488	GO:0007155	GO:0007160	GO:0007229	GO:0008305	GO:0008152	GO:0016747	GO:0005199	GO:0009277	GO:0051536
2.0_INSECT_GG3J73P03FOI4X	GO:0009055	GO:0051536
2.0_INSECT_GG3J73P03FOIJZ	GO:0008152	GO:0016747	GO:0009055	GO:0004872	GO:0005488	GO:0007155	GO:0007160	GO:0007229	GO:0008305	GO:0005576	GO:0006952	GO:0005515
2.0_INSECT_GG3J73P03FOIVK	GO:0005576	GO:0009055	GO:0004872	GO:0005488	GO:0007155	GO:0007160	GO:0007229	GO:0008305	GO:0005515
2.0_INSECT_GG3J73P03FOIXR	GO:0009055	GO:0005515
2.0_INSECT_GG3J73P03FOJ0O	GO:0009055	GO:0008152	GO:0016747
2.0_INSECT_GG3J73P03FOJ36	GO:0005515	GO:0008152	GO:0016747	GO:0005576	GO:0009055	GO:0051536	GO:0005525	GO:0005874	GO:0007017	GO:0006952	GO:0046872	GO:0004872	GO:0005488	GO:0007155	GO:0007160	GO:0007229	GO:0008305	GO:0005199	GO:0009277	GO:0004252	GO:0006508
2.0_INSECT_GG3J73P03FOJ5R	GO:0009055	GO:0016068	GO:0051536	GO:0004872	GO:0005488	GO:0007155	GO:0007160	GO:0007229	GO:0008305	GO:0005576	GO:0005515	GO:0005199	GO:0009277	GO:0008152	GO:0016747	GO:0006952	GO:0005525	GO:0005874	GO:0007017
2.0_INSECT_GG3J73P03FOJ6G	GO:0009055	GO:0051536	GO:0004872	GO:0005488	GO:0007155	GO:0007160	GO:0007229	GO:0008305	GO:0005576	GO:0006952	GO:0005515
2.0_INSECT_GG3J73P03FOJL1	GO:0009055	GO:0005525	GO:0005874	GO:0007017	GO:0005576	GO:0005515	GO:0005199	GO:0009277	GO:0008152	GO:0016747	GO:0051536	GO:0006952	GO:0004872	GO:0005488	GO:0007155	GO:0007160	GO:0007229	GO:0008305	GO:0046872	GO:0016068
2.0_INSECT_GG3J73P03FOK0F	GO:0009055	GO:0004872	GO:0005488	GO:0007155	GO:0007160	GO:0007229	GO:0008305	GO:0005576	GO:0006952	GO:0005515	GO:0008152	GO:0016747	GO:0051536	GO:0016068	GO:0009755	GO:0046872
2.0_INSECT_GG3J73P03FOK7V	GO:0009055	GO:0051536	GO:0004872	GO:0005488	GO:0007155	GO:0007160	GO:0007229	GO:0008305	GO:0005576	GO:0005515
2.0_INSECT_GG3J73P03FOK9C	GO:0009055	GO:0005515	GO:0005576	GO:0051536	GO:0004872	GO:0005488	GO:0007155	GO:0007160	GO:0007229	GO:0008305	GO:0006952	GO:0046872	GO:0008152	GO:0016747	GO:0005199	GO:0009277	GO:0005525	GO:0005874	GO:0007017
2.0_INSECT_GG3J73P03FOKPY	GO:0009055	GO:0005576	GO:0004872	GO:0005488	GO:0007155	GO:0007160	GO:0007229	GO:0008305	GO:0005515	GO:0051536	GO:0006952	GO:0008152	GO:0016747	GO:0046872	GO:0016068	GO:0005525	GO:0005874	GO:0007017
2.0_INSECT_GG3J73P03FOKWA	GO:0009055
2.0_INSECT_GG3J73P03FOL0G	GO:0008152	GO:0016747	GO:0009055	GO:0005576	GO:0005515	GO:0004872	GO:0005488	GO:0007155	GO:0007160	GO:0007229	GO:0008305	GO:0051536	GO:0006952
2.0_INSECT_GG3J73P03FOLBZ	GO:0008152	GO:0016747	GO:0009055	GO:0005515	GO:0051536	GO:0005576	GO:0004872	GO:0005488	GO:0007155	GO:0007160	GO:0007229	GO:0008305
2.0_INSECT_GG3J73P03FOLS5	GO:0009055	GO:0005576	GO:0005515
2.0_INSECT_GG3J73P03FOMBD	GO:0009055	GO:0005515
2.0_INSECT_GG3J73P03FON0N	GO:0005525	GO:0005874	GO:0007017	GO:0008152	GO:0016747	GO:0009055	GO:0005515	GO:0004872	GO:0005488	GO:0007155	GO:0007160	GO:0007229	GO:0008305	GO:0005576	GO:0051536	GO:0006952
2.0_INSECT_GG3J73P03FON3G	GO:0009055	GO:0004872	GO:0005488	GO:0007155	GO:0007160	GO:0007229	GO:0008305	GO:0005515	GO:0051536	GO:0005576	GO:0008152	GO:0016747	GO:0005525	GO:0005874	GO:0007017	GO:0006952
2.0_INSECT_GG3J73P03FONAA	GO:0009055	GO:0008152	GO:0016747	GO:0005515	GO:0005576	GO:0004872	GO:0005488	GO:0007155	GO:0007160	GO:0007229	GO:0008305	GO:0051536	GO:0006952
2.0_INSECT_GG3J73P03FOO8G	GO:0008152	GO:0016747	GO:0005576	GO:0005515
2.0_INSECT_GG3J73P03FOOVN	GO:0009055	GO:0051536	GO:0005515	GO:0008152	GO:0016747	GO:0005576	GO:0005525	GO:0005874	GO:0007017	GO:0004872	GO:0005488	GO:0007155	GO:0007160	GO:0007229	GO:0008305	GO:0006952	GO:0016068	GO:0009755
2.0_INSECT_GG3J73P03FOP0K	GO:0005515
2.0_INSECT_GG3J73P03FOQ5O	GO:0009055	GO:0008152	GO:0016747	GO:0005576	GO:0005515
2.0_INSECT_GG3J73P03FOQ7M	GO:0008152	GO:0016747	GO:0005515
2.0_INSECT_GG3J73P03FORV2	GO:0005576	GO:0009055	GO:0051536	GO:0005515	GO:0008152	GO:0016747
2.0_INSECT_GG3J73P03FOSGE	GO:0009055	GO:0004872	GO:0005488	GO:0007155	GO:0007160	GO:0007229	GO:0008305	GO:0051536	GO:0005576	GO:0005515	GO:0042309	GO:0050825	GO:0050826	GO:0005525	GO:0005874	GO:0007017	GO:0008152	GO:0016747	GO:0006952
2.0_INSECT_GG3J73P03FOSJC	GO:0009055	GO:0005515
2.0_INSECT_GG3J73P03FOSN0	GO:0009055	GO:0051536	GO:0008152	GO:0016747	GO:0004872	GO:0005488	GO:0007155	GO:0007160	GO:0007229	GO:0008305	GO:0005515	GO:0005576	GO:0006952	GO:0005525	GO:0005874	GO:0007017	GO:0009755
2.0_INSECT_GG3J73P03FOSPP	GO:0005515	GO:0008152	GO:0016747	GO:0046872	GO:0009055	GO:0051536	GO:0005576	GO:0004872	GO:0005488	GO:0007155	GO:0007160	GO:0007229	GO:0008305	GO:0006952
2.0_INSECT_GG3J73P03FOTKW	GO:0008152	GO:0016747
2.0_INSECT_GG3J73P03FOTN8	GO:0009055	GO:0005515	GO:0005576	GO:0008152	GO:0016747	GO:0051536	GO:0006952
2.0_INSECT_GG3J73P03FOU02	GO:0008152	GO:0016747	GO:0009055	GO:0005576	GO:0005515	GO:0051536
2.0_INSECT_GG3J73P03FOUH5	GO:0009055
2.0_INSECT_GG3J73P03FOUN0	GO:0005515	GO:0008152	GO:0016747	GO:0009055	GO:0051536	GO:0005576	GO:0005525	GO:0005874	GO:0007017	GO:0006952
2.0_INSECT_GG3J73P03FOUOF	GO:0009055	GO:0005515	GO:0008152	GO:0016747	GO:0005576	GO:0051536	GO:0004872	GO:0005488	GO:0007155	GO:0007160	GO:0007229	GO:0008305	GO:0006952
2.0_INSECT_GG3J73P03FOUWW	GO:0009055	GO:0005576	GO:0006952	GO:0005515	GO:0008152	GO:0016747	GO:0005525	GO:0005874	GO:0007017	GO:0005199	GO:0009277
2.0_INSECT_GG3J73P03FOV26	GO:0005576	GO:0005515	GO:0009055
2.0_INSECT_GG3J73P03FOV69	GO:0009055	GO:0051536	GO:0005515	GO:0005525	GO:0005874	GO:0007017	GO:0005576	GO:0004872	GO:0005488	GO:0007155	GO:0007160	GO:0007229	GO:0008305	GO:0006952	GO:0008152	GO:0016747
2.0_INSECT_GG3J73P03FOWD4	GO:0009055	GO:0008152	GO:0016747	GO:0005515	GO:0051536	GO:0005576	GO:0006952	GO:0009755
2.0_INSECT_GG3J73P03FOWNU	GO:0009055	GO:0008152	GO:0016747	GO:0051536	GO:0004872	GO:0005488	GO:0007155	GO:0007160	GO:0007229	GO:0008305	GO:0005515	GO:0005576	GO:0005525	GO:0005874	GO:0007017	GO:0006952
2.0_INSECT_GG3J73P03FOXI6	GO:0009055	GO:0005515
2.0_INSECT_GG3J73P03FOYGI	GO:0005576	GO:0008152	GO:0016747	GO:0009055	GO:0051536	GO:0005515	GO:0001558	GO:0005520
2.0_INSECT_GG3J73P03FOZAG	GO:0005199	GO:0009277	GO:0016068	GO:0008152	GO:0016747	GO:0009055	GO:0051536	GO:0005525	GO:0005874	GO:0007017	GO:0004872	GO:0005488	GO:0007155	GO:0007160	GO:0007229	GO:0008305	GO:0005576	GO:0005515	GO:0006952
2.0_INSECT_GG3J73P03FOZUG	GO:0009055	GO:0051536	GO:0005515	GO:0008152	GO:0016747	GO:0004872	GO:0005488	GO:0007155	GO:0007160	GO:0007229	GO:0008305	GO:0005576	GO:0006952	GO:0016068
2.0_INSECT_GG3J73P03FOZX9	GO:0009055
2.0_INSECT_GG3J73P03FP0EG	GO:0009055	GO:0051536
2.0_INSECT_GG3J73P03FP0V8	GO:0008152	GO:0016747	GO:0009055	GO:0051536	GO:0005515
2.0_INSECT_GG3J73P03FP1NA	GO:0008152	GO:0016747	GO:0005515	GO:0009055	GO:0051536	GO:0005576	GO:0009755	GO:0006952
2.0_INSECT_GG3J73P03FP2KX	GO:0005576	GO:0006952	GO:0005515	GO:0009055	GO:0008152	GO:0016747	GO:0051536	GO:0046872	GO:0004872	GO:0005488	GO:0007155	GO:0007160	GO:0007229	GO:0008305	GO:0005525	GO:0005874	GO:0007017
2.0_INSECT_GG3J73P03FP3WE	GO:0009055	GO:0005576	GO:0005515	GO:0005525	GO:0005874	GO:0007017	GO:0051536	GO:0004872	GO:0005488	GO:0007155	GO:0007160	GO:0007229	GO:0008305	GO:0008152	GO:0016747	GO:0006952
2.0_INSECT_GG3J73P03FP4GH	GO:0009055	GO:0005576	GO:0005515	GO:0051536	GO:0005199	GO:0009277	GO:0008152	GO:0016747	GO:0004872	GO:0005488	GO:0007155	GO:0007160	GO:0007229	GO:0008305	GO:0006952
2.0_INSECT_GG3J73P03FP4D4	GO:0009055	GO:0005515	GO:0051536	GO:0005576	GO:0006952	GO:0008152	GO:0016747	GO:0004872	GO:0005488	GO:0007155	GO:0007160	GO:0007229	GO:0008305
2.0_INSECT_GG3J73P03FP4TF	GO:0005515
2.0_INSECT_GG3J73P03FP53I	GO:0009055
2.0_INSECT_GG3J73P03FP5R3	GO:0005515
2.0_INSECT_GG3J73P03FP5SF	GO:0009055	GO:0051536	GO:0004872	GO:0005488	GO:0007155	GO:0007160	GO:0007229	GO:0008305	GO:0005515
2.0_INSECT_GG3J73P03FP60L	GO:0005515	GO:0009055	GO:0051536	GO:0005576	GO:0006952	GO:0008152	GO:0016747	GO:0004872	GO:0005488	GO:0007155	GO:0007160	GO:0007229	GO:0008305	GO:0005525	GO:0005874	GO:0007017
2.0_INSECT_GG3J73P03FP6AO	GO:0009055	GO:0005515	GO:0005576	GO:0051536	GO:0006952	GO:0005199	GO:0009277
2.0_INSECT_GG3J73P03FP6OI	GO:0009055	GO:0005515
2.0_INSECT_GG3J73P03FP6YN	GO:0009055	GO:0005515	GO:0008152	GO:0016747	GO:0005576	GO:0051536	GO:0004872	GO:0005488	GO:0007155	GO:0007160	GO:0007229	GO:0008305
2.0_INSECT_GG3J73P03FP709	GO:0009055	GO:0008152	GO:0016747	GO:0005525	GO:0005874	GO:0007017	GO:0005515
2.0_INSECT_GG3J73P03FP7AS	GO:0005576	GO:0008152	GO:0016747	GO:0005525	GO:0005874	GO:0007017	GO:0004872	GO:0005488	GO:0007155	GO:0007160	GO:0007229	GO:0008305	GO:0009055	GO:0005515	GO:0009405	GO:0006952	GO:0005199	GO:0009277	GO:0051536	GO:0009755
2.0_INSECT_GG3J73P03FP7YU	GO:0009055	GO:0005576	GO:0004872	GO:0005488	GO:0007155	GO:0007160	GO:0007229	GO:0008305	GO:0005515
2.0_INSECT_GG3J73P03FP7Z4	GO:0009055	GO:0005515	GO:0005576	GO:0008152	GO:0016747	GO:0004872	GO:0005488	GO:0007155	GO:0007160	GO:0007229	GO:0008305	GO:0005199	GO:0009277	GO:0005525	GO:0005874	GO:0007017
2.0_INSECT_GG3J73P03FP88Y	GO:0009055	GO:0005515	GO:0051536	GO:0005576	GO:0008152	GO:0016747	GO:0005525	GO:0005874	GO:0007017	GO:0004872	GO:0005488	GO:0007155	GO:0007160	GO:0007229	GO:0008305
2.0_INSECT_GG3J73P03FP90L	GO:0009055	GO:0008152	GO:0016747	GO:0051536	GO:0005576	GO:0006952	GO:0005515	GO:0004872	GO:0005488	GO:0007155	GO:0007160	GO:0007229	GO:0008305	GO:0005525	GO:0005874	GO:0007017
2.0_INSECT_GG3J73P03FP9CK	GO:0009055
2.0_INSECT_GG3J73P03FP9WC	GO:0009055	GO:0005515	GO:0051536	GO:0005576	GO:0006952	GO:0008152	GO:0016747	GO:0004872	GO:0005488	GO:0007155	GO:0007160	GO:0007229	GO:0008305	GO:0005525	GO:0005874	GO:0007017
2.0_INSECT_GG3J73P03FPA53	GO:0008152	GO:0016747	GO:0009055	GO:0051536	GO:0005576	GO:0005515
2.0_INSECT_GG3J73P03FPATF	GO:0009055	GO:0051536	GO:0005576	GO:0006952	GO:0005515	GO:0005525	GO:0005874	GO:0007017
2.0_INSECT_GG3J73P03FPAWW	GO:0009055	GO:0005515	GO:0005576	GO:0006952	GO:0008152	GO:0016747	GO:0005199	GO:0009277	GO:0051536	GO:0005525	GO:0005874	GO:0007017	GO:0004872	GO:0005488	GO:0007155	GO:0007160	GO:0007229	GO:0008305	GO:0046872	GO:0016068
2.0_INSECT_GG3J73P03FPAY3	GO:0004872	GO:0005488	GO:0007155	GO:0007160	GO:0007229	GO:0008305	GO:0005515	GO:0005525	GO:0005874	GO:0007017	GO:0008152	GO:0016747	GO:0009055	GO:0051536	GO:0005576	GO:0006952	GO:0003676	GO:0008270
2.0_INSECT_GG3J73P03FPB7P	GO:0009055
2.0_INSECT_GG3J73P03FPBIS	GO:0009055	GO:0005576	GO:0005515	GO:0051536	GO:0005199	GO:0009277	GO:0004872	GO:0005488	GO:0007155	GO:0007160	GO:0007229	GO:0008305	GO:0008152	GO:0016747
2.0_INSECT_GG3J73P03FPC19	GO:0009055	GO:0051536	GO:0008152	GO:0016747	GO:0005576	GO:0004872	GO:0005488	GO:0007155	GO:0007160	GO:0007229	GO:0008305	GO:0006952	GO:0005515	GO:0009755	GO:0005199	GO:0009277
2.0_INSECT_GG3J73P03FPCC9	GO:0009055	GO:0051536	GO:0005576	GO:0005515	GO:0006952	GO:0005525	GO:0005874	GO:0007017	GO:0008152	GO:0016747	GO:0005199	GO:0009277
2.0_INSECT_GG3J73P03FPDTP	GO:0009055	GO:0005515	GO:0005576	GO:0006952	GO:0046872	GO:0005525	GO:0005874	GO:0007017	GO:0004872	GO:0005488	GO:0007155	GO:0007160	GO:0007229	GO:0008305	GO:0051536	GO:0008152	GO:0016747
2.0_INSECT_GG3J73P03FPDUC	GO:0008152	GO:0016747	GO:0004872	GO:0005488	GO:0007155	GO:0007160	GO:0007229	GO:0008305	GO:0005515	GO:0009055	GO:0005576	GO:0046872	GO:0051536	GO:0005525	GO:0005874	GO:0007017	GO:0006952	GO:0009405	GO:0005199	GO:0009277
2.0_INSECT_GG3J73P03FPEGM	GO:0009055	GO:0005515	GO:0051536	GO:0005525	GO:0005874	GO:0007017	GO:0004872	GO:0005488	GO:0007155	GO:0007160	GO:0007229	GO:0008305	GO:0005576	GO:0008152	GO:0016747	GO:0006952	GO:0042309	GO:0050825	GO:0050826	GO:0009405
2.0_INSECT_GG3J73P03FPGA7	GO:0005576	GO:0005515	GO:0009055	GO:0008152	GO:0016747	GO:0051536	GO:0006952	GO:0005199	GO:0009277	GO:0016068	GO:0004872	GO:0005488	GO:0007155	GO:0007160	GO:0007229	GO:0008305
2.0_INSECT_GG3J73P03FPGFN	GO:0009055	GO:0005515	GO:0051536	GO:0005576	GO:0006952	GO:0008152	GO:0016747	GO:0004872	GO:0005488	GO:0007155	GO:0007160	GO:0007229	GO:0008305	GO:0016068	GO:0005525	GO:0005874	GO:0007017
2.0_INSECT_GG3J73P03FPGL5	GO:0009055	GO:0051536	GO:0005515
2.0_INSECT_GG3J73P03FPGZU	GO:0008152	GO:0016747	GO:0005515	GO:0009055	GO:0001558	GO:0005520	GO:0005576	GO:0006952	GO:0004872	GO:0005488	GO:0007155	GO:0007160	GO:0007229	GO:0008305	GO:0051536	GO:0005525	GO:0005874	GO:0007017	GO:0005199	GO:0009277	GO:0016068
2.0_INSECT_GG3J73P03FPH1Q	GO:0008152	GO:0016747	GO:0009055	GO:0051536	GO:0005576	GO:0005515	GO:0004872	GO:0005488	GO:0007155	GO:0007160	GO:0007229	GO:0008305	GO:0006952	GO:0005525	GO:0005874	GO:0007017	GO:0005199	GO:0009277
2.0_INSECT_GG3J73P03FPH89	GO:0008152	GO:0016747	GO:0005576	GO:0009055	GO:0005525	GO:0005874	GO:0007017	GO:0005515	GO:0051536	GO:0042309	GO:0050825	GO:0050826	GO:0003676	GO:0008270	GO:0004872	GO:0005488	GO:0007155	GO:0007160	GO:0007229	GO:0008305	GO:0005199	GO:0009277	GO:0006952
2.0_INSECT_GG3J73P03FPHG1	GO:0008152	GO:0016747	GO:0009055	GO:0005515
2.0_INSECT_GG3J73P03FPHXP	GO:0008152	GO:0016747	GO:0009055	GO:0005576	GO:0006952	GO:0005515	GO:0004872	GO:0005488	GO:0007155	GO:0007160	GO:0007229	GO:0008305	GO:0005525	GO:0005874	GO:0007017	GO:0051536	GO:0005199	GO:0009277	GO:0042309	GO:0050825	GO:0050826	GO:0001558	GO:0005520
2.0_INSECT_GG3J73P03FPHZ6	GO:0005515	GO:0008152	GO:0016747	GO:0009055	GO:0004872	GO:0005488	GO:0007155	GO:0007160	GO:0007229	GO:0008305	GO:0005576	GO:0006952	GO:0051536	GO:0005525	GO:0005874	GO:0007017
2.0_INSECT_GG3J73P03FPJ64	GO:0009055	GO:0051536	GO:0004872	GO:0005488	GO:0007155	GO:0007160	GO:0007229	GO:0008305	GO:0005576	GO:0006952	GO:0005515
2.0_INSECT_GG3J73P03FPJ6F	GO:0009055	GO:0005576	GO:0006952	GO:0005515
2.0_INSECT_GG3J73P03FPJLC	GO:0009055	GO:0005515	GO:0051536	GO:0008152	GO:0016747	GO:0005576	GO:0006952	GO:0005525	GO:0005874	GO:0007017	GO:0009405	GO:0016068
2.0_INSECT_GG3J73P03FPJXO	GO:0009055	GO:0008152	GO:0016747	GO:0051536	GO:0005576	GO:0005515	GO:0005525	GO:0005874	GO:0007017	GO:0004872	GO:0005488	GO:0007155	GO:0007160	GO:0007229	GO:0008305
2.0_INSECT_GG3J73P03FPLBM	GO:0009055	GO:0005576	GO:0051536
2.0_INSECT_GG3J73P03FPLE6	GO:0009055	GO:0051536	GO:0005515	GO:0005576	GO:0008152	GO:0016747	GO:0005199	GO:0009277	GO:0005525	GO:0005874	GO:0007017	GO:0004872	GO:0005488	GO:0007155	GO:0007160	GO:0007229	GO:0008305
2.0_INSECT_GG3J73P03FPLPZ	GO:0008152	GO:0016747	GO:0009055	GO:0005515	GO:0046872	GO:0005576	GO:0016068	GO:0051536	GO:0006952	GO:0009755
2.0_INSECT_GG3J73P03FPLQX	GO:0005576
2.0_INSECT_GG3J73P03FPM8W	GO:0009055	GO:0051536	GO:0005576	GO:0005515	GO:0008152	GO:0016747	GO:0006952	GO:0004872	GO:0005488	GO:0007155	GO:0007160	GO:0007229	GO:0008305	GO:0005525	GO:0005874	GO:0007017	GO:0001558	GO:0005520
2.0_INSECT_GG3J73P03FPMJ7	GO:0009055	GO:0051536	GO:0008152	GO:0016747	GO:0004872	GO:0005488	GO:0007155	GO:0007160	GO:0007229	GO:0008305	GO:0005576	GO:0005515	GO:0005525	GO:0005874	GO:0007017	GO:0006952	GO:0005199	GO:0009277
2.0_INSECT_GG3J73P03FPNHP	GO:0005576
2.0_INSECT_GG3J73P03FPNPD	GO:0005525	GO:0005874	GO:0007017	GO:0016068	GO:0009055	GO:0051536	GO:0008152	GO:0016747	GO:0005515	GO:0004872	GO:0005488	GO:0007155	GO:0007160	GO:0007229	GO:0008305	GO:0046872	GO:0005199	GO:0009277	GO:0005576
2.0_INSECT_GG3J73P03FPNW0	GO:0009055	GO:0005576	GO:0006952	GO:0051536	GO:0005515
2.0_INSECT_GG3J73P03FPOTL	GO:0005525	GO:0005874	GO:0007017	GO:0005515	GO:0004872	GO:0005488	GO:0007155	GO:0007160	GO:0007229	GO:0008305	GO:0009055	GO:0008152	GO:0016747	GO:0005576	GO:0051536	GO:0006952	GO:0046872	GO:0009755
2.0_INSECT_GG3J73P03FPOZQ	GO:0009055	GO:0051536	GO:0008152	GO:0016747	GO:0005515	GO:0005576	GO:0006952	GO:0005525	GO:0005874	GO:0007017
2.0_INSECT_GG3J73P03FPP1N	GO:0008152	GO:0016747	GO:0009055	GO:0005576	GO:0005515	GO:0051536	GO:0006952	GO:0004872	GO:0005488	GO:0007155	GO:0007160	GO:0007229	GO:0008305	GO:0016068	GO:0005525	GO:0005874	GO:0007017
2.0_INSECT_GG3J73P03FPPBP	GO:0005515	GO:0009055
2.0_INSECT_GG3J73P03FPPR9	GO:0008152	GO:0016747	GO:0009055	GO:0005199	GO:0009277	GO:0005576	GO:0005515
2.0_INSECT_GG3J73P03FPQ35	GO:0009055	GO:0005576	GO:0006952	GO:0005515
2.0_INSECT_GG3J73P03FPQ69	GO:0005515
2.0_INSECT_GG3J73P03FPQ8V	GO:0009055	GO:0005576	GO:0005515
2.0_INSECT_GG3J73P03FPQE9	GO:0005515	GO:0008152	GO:0016747	GO:0009055	GO:0005576	GO:0051536	GO:0006952	GO:0005525	GO:0005874	GO:0007017	GO:0004872	GO:0005488	GO:0007155	GO:0007160	GO:0007229	GO:0008305
2.0_INSECT_GG3J73P03FPQMY	GO:0005576
2.0_INSECT_GG3J73P03FPQOS	GO:0008152	GO:0016747	GO:0005576	GO:0005515	GO:0009055	GO:0005525	GO:0005874	GO:0007017	GO:0006952	GO:0051536	GO:0004872	GO:0005488	GO:0007155	GO:0007160	GO:0007229	GO:0008305
2.0_INSECT_GG3J73P03FPQXZ	GO:0008152	GO:0016747	GO:0005576	GO:0005515	GO:0009055
2.0_INSECT_GG3J73P03FPRH1	GO:0009055	GO:0008152	GO:0016747	GO:0005199	GO:0009277	GO:0005515	GO:0005576	GO:0051536	GO:0006952	GO:0005525	GO:0005874	GO:0007017	GO:0004872	GO:0005488	GO:0007155	GO:0007160	GO:0007229	GO:0008305
2.0_INSECT_GG3J73P03FPRJ5	GO:0008152	GO:0016747	GO:0009055	GO:0004872	GO:0005488	GO:0007155	GO:0007160	GO:0007229	GO:0008305	GO:0005576	GO:0005515	GO:0005525	GO:0005874	GO:0007017	GO:0051536	GO:0006952
2.0_INSECT_GG3J73P03FPRRX	GO:0005576
2.0_INSECT_GG3J73P03FPS3A	GO:0005576	GO:0005515	GO:0009055	GO:0008152	GO:0016747	GO:0051536	GO:0006952	GO:0005525	GO:0005874	GO:0007017	GO:0004872	GO:0005488	GO:0007155	GO:0007160	GO:0007229	GO:0008305
2.0_INSECT_GG3J73P03FPT6B	GO:0009055	GO:0005515	GO:0008152	GO:0016747	GO:0051536	GO:0005576	GO:0005525	GO:0005874	GO:0007017	GO:0004872	GO:0005488	GO:0007155	GO:0007160	GO:0007229	GO:0008305	GO:0009405	GO:0006952	GO:0005199	GO:0009277
2.0_INSECT_GG3J73P03FPT70	GO:0009055	GO:0008152	GO:0016747
2.0_INSECT_GG3J73P03FPT8C	GO:0008152	GO:0016747	GO:0009055	GO:0005576	GO:0051536	GO:0005515
2.0_INSECT_GG3J73P03FPTXI	GO:0008152	GO:0016747	GO:0009055	GO:0005515
2.0_INSECT_GG3J73P03FPUI8	GO:0005515
2.0_INSECT_GG3J73P03FPULS	GO:0008152	GO:0016747	GO:0009055	GO:0051536	GO:0005576	GO:0005515
2.0_INSECT_GG3J73P03FPWR1	GO:0009055	GO:0051536	GO:0005199	GO:0009277	GO:0005576	GO:0005515	GO:0008152	GO:0016747	GO:0005525	GO:0005874	GO:0007017	GO:0004872	GO:0005488	GO:0007155	GO:0007160	GO:0007229	GO:0008305
2.0_INSECT_GG3J73P03FPX1C	GO:0009055	GO:0005576	GO:0008152	GO:0016747	GO:0051536
2.0_INSECT_GG3J73P03FPX4M	GO:0009055	GO:0016068	GO:0008152	GO:0016747	GO:0005515	GO:0051536	GO:0005576	GO:0004872	GO:0005488	GO:0007155	GO:0007160	GO:0007229	GO:0008305	GO:0046872	GO:0006952	GO:0005525	GO:0005874	GO:0007017
2.0_INSECT_GG3J73P03FPXCC	GO:0005515	GO:0008152	GO:0016747	GO:0009055	GO:0051536	GO:0005576	GO:0004872	GO:0005488	GO:0007155	GO:0007160	GO:0007229	GO:0008305	GO:0006952
2.0_INSECT_GG3J73P03FPXGI	GO:0009055
2.0_INSECT_GG3J73P03FPXSO	GO:0009055	GO:0005576	GO:0051536	GO:0005515
2.0_INSECT_GG3J73P03FPXYB	GO:0005515	GO:0008152	GO:0016747	GO:0005576	GO:0004872	GO:0005488	GO:0007155	GO:0007160	GO:0007229	GO:0008305	GO:0009055	GO:0051536	GO:0006952	GO:0005525	GO:0005874	GO:0007017	GO:0009755
2.0_INSECT_GG3J73P03FPYP2	GO:0005525	GO:0005874	GO:0007017	GO:0005515	GO:0009055	GO:0005576	GO:0006952	GO:0051536	GO:0008152	GO:0016747	GO:0004872	GO:0005488	GO:0007155	GO:0007160	GO:0007229	GO:0008305
2.0_INSECT_GG3J73P03FPYRP	GO:0016068	GO:0009055	GO:0051536	GO:0005576	GO:0006952	GO:0005515
2.0_INSECT_GG3J73P03FPZ91	GO:0005515
2.0_INSECT_GG3J73P03FPZB2	GO:0008152	GO:0016747	GO:0009055	GO:0051536	GO:0005515	GO:0005576	GO:0006952	GO:0005525	GO:0005874	GO:0007017
2.0_INSECT_GG3J73P03FQ09X	GO:0009055	GO:0005199	GO:0009277	GO:0016068	GO:0008152	GO:0016747	GO:0005576	GO:0006952	GO:0005515	GO:0051536	GO:0004872	GO:0005488	GO:0007155	GO:0007160	GO:0007229	GO:0008305	GO:0005525	GO:0005874	GO:0007017
2.0_INSECT_GG3J73P03FQ1E4	GO:0009055	GO:0004872	GO:0005488	GO:0007155	GO:0007160	GO:0007229	GO:0008305	GO:0005515	GO:0008152	GO:0016747	GO:0005576	GO:0006952	GO:0051536	GO:0005525	GO:0005874	GO:0007017
2.0_INSECT_GG3J73P03FQ1FB	GO:0008152	GO:0016747	GO:0009055	GO:0051536	GO:0005515	GO:0005576	GO:0006952	GO:0004872	GO:0005488	GO:0007155	GO:0007160	GO:0007229	GO:0008305
2.0_INSECT_GG3J73P03FQ1LB	GO:0009055	GO:0005576	GO:0005515	GO:0051536	GO:0004872	GO:0005488	GO:0007155	GO:0007160	GO:0007229	GO:0008305	GO:0006952	GO:0016068	GO:0008152	GO:0016747	GO:0042309	GO:0050825	GO:0050826
2.0_INSECT_GG3J73P03FQ20H	GO:0005515	GO:0009055	GO:0051536	GO:0005576	GO:0008152	GO:0016747	GO:0006952	GO:0004872	GO:0005488	GO:0007155	GO:0007160	GO:0007229	GO:0008305	GO:0005525	GO:0005874	GO:0007017
2.0_INSECT_GG3J73P03FQ2RX	GO:0009055	GO:0051536	GO:0004872	GO:0005488	GO:0007155	GO:0007160	GO:0007229	GO:0008305	GO:0005576	GO:0005515	GO:0005525	GO:0005874	GO:0007017
2.0_INSECT_GG3J73P03FQ3G5	GO:0042309	GO:0050825	GO:0050826	GO:0009055
2.0_INSECT_GG3J73P03FQ4NL	GO:0009055	GO:0005515	GO:0008152	GO:0016747	GO:0051536	GO:0005576
2.0_INSECT_GG3J73P03FQ4U6	GO:0009055	GO:0005576	GO:0005515
2.0_INSECT_GG3J73P03FQ4YI	GO:0005515	GO:0009055	GO:0051536	GO:0005525	GO:0005874	GO:0007017	GO:0005576	GO:0006952	GO:0008152	GO:0016747
2.0_INSECT_GG3J73P03FQ57D	GO:0009055	GO:0004872	GO:0005488	GO:0007155	GO:0007160	GO:0007229	GO:0008305	GO:0005576	GO:0006952	GO:0005515	GO:0008152	GO:0016747	GO:0051536	GO:0005525	GO:0005874	GO:0007017
2.0_INSECT_GG3J73P03FQ71A	GO:0009055	GO:0051536	GO:0005576	GO:0006952	GO:0005515	GO:0004872	GO:0005488	GO:0007155	GO:0007160	GO:0007229	GO:0008305	GO:0005525	GO:0005874	GO:0007017	GO:0008152	GO:0016747
2.0_INSECT_GG3J73P03FQ721	GO:0009055	GO:0005576	GO:0005515	GO:0004872	GO:0005488	GO:0007155	GO:0007160	GO:0007229	GO:0008305	GO:0051536	GO:0008152	GO:0016747	GO:0006952
2.0_INSECT_GG3J73P03FQ758	GO:0008152	GO:0016747	GO:0009055	GO:0004872	GO:0005488	GO:0007155	GO:0007160	GO:0007229	GO:0008305	GO:0005576	GO:0005515	GO:0006952	GO:0051536
2.0_INSECT_GG3J73P03FQ7RX	GO:0009055	GO:0005576	GO:0005515	GO:0006952	GO:0008152	GO:0016747	GO:0046872	GO:0005199	GO:0009277	GO:0005525	GO:0005874	GO:0007017	GO:0016068	GO:0004872	GO:0005488	GO:0007155	GO:0007160	GO:0007229	GO:0008305
2.0_INSECT_GG3J73P03FQ7Z4	GO:0009055	GO:0005576	GO:0008152	GO:0016747	GO:0004872	GO:0005488	GO:0007155	GO:0007160	GO:0007229	GO:0008305	GO:0005515	GO:0051536	GO:0005525	GO:0005874	GO:0007017	GO:0016068	GO:0006952
2.0_INSECT_GG3J73P03FQ87T	GO:0009055
2.0_INSECT_GG3J73P03FQ8P8	GO:0008152	GO:0016747	GO:0009055	GO:0051536	GO:0004872	GO:0005488	GO:0007155	GO:0007160	GO:0007229	GO:0008305	GO:0005576	GO:0005515	GO:0005525	GO:0005874	GO:0007017	GO:0006952
2.0_INSECT_GG3J73P03FQ8RG	GO:0008152	GO:0016747	GO:0009055	GO:0051536	GO:0005576	GO:0006952	GO:0005515	GO:0009755	GO:0005525	GO:0005874	GO:0007017
2.0_INSECT_GG3J73P03FQ8WJ	GO:0009055	GO:0005515	GO:0005525	GO:0005874	GO:0007017	GO:0008152	GO:0016747	GO:0051536	GO:0004872	GO:0005488	GO:0007155	GO:0007160	GO:0007229	GO:0008305	GO:0005576	GO:0006952
2.0_INSECT_GG3J73P03FQ8YO	GO:0008152	GO:0016747	GO:0005515
2.0_INSECT_GG3J73P03FQ9II	GO:0009055	GO:0005576	GO:0005515	GO:0008152	GO:0016747	GO:0051536	GO:0005525	GO:0005874	GO:0007017
2.0_INSECT_GG3J73P03FQA75	GO:0009055	GO:0005515	GO:0008152	GO:0016747	GO:0004872	GO:0005488	GO:0007155	GO:0007160	GO:0007229	GO:0008305	GO:0005576	GO:0051536	GO:0005525	GO:0005874	GO:0007017
2.0_INSECT_GG3J73P03FQACK	GO:0009055	GO:0051536	GO:0004872	GO:0005488	GO:0007155	GO:0007160	GO:0007229	GO:0008305	GO:0005576	GO:0006952	GO:0005515	GO:0008152	GO:0016747	GO:0005525	GO:0005874	GO:0007017
2.0_INSECT_GG3J73P03FQAT7	GO:0005515	GO:0005576	GO:0009055	GO:0051536
2.0_INSECT_GG3J73P03FQBYU	GO:0009055
2.0_INSECT_GG3J73P03FQC5K	GO:0009055	GO:0051536	GO:0005576	GO:0005515	GO:0008152	GO:0016747	GO:0004872	GO:0005488	GO:0007155	GO:0007160	GO:0007229	GO:0008305
2.0_INSECT_GG3J73P03FQCG1	GO:0008152	GO:0016747	GO:0009055	GO:0051536
2.0_INSECT_GG3J73P03FQCKP	GO:0008152	GO:0016747	GO:0009055	GO:0005576	GO:0005515
2.0_INSECT_GG3J73P03FQCY1	GO:0008152	GO:0016747
2.0_INSECT_GG3J73P03FQDEM	GO:0009055	GO:0005515	GO:0005576	GO:0051536	GO:0006952	GO:0004872	GO:0005488	GO:0007155	GO:0007160	GO:0007229	GO:0008305	GO:0008152	GO:0016747	GO:0005525	GO:0005874	GO:0007017	GO:0005199	GO:0009277
2.0_INSECT_GG3J73P03FQGN8	GO:0008152	GO:0016747	GO:0005515	GO:0009055	GO:0005576	GO:0051536	GO:0004872	GO:0005488	GO:0007155	GO:0007160	GO:0007229	GO:0008305	GO:0006952	GO:0005525	GO:0005874	GO:0007017
2.0_INSECT_GG3J73P03FQGQG	GO:0004872	GO:0005488	GO:0007155	GO:0007160	GO:0007229	GO:0008305	GO:0005576	GO:0005515	GO:0009055	GO:0051536	GO:0005199	GO:0009277	GO:0006952	GO:0008152	GO:0016747	GO:0042309	GO:0050825	GO:0050826	GO:0005525	GO:0005874	GO:0007017
2.0_INSECT_GG3J73P03FQGST	GO:0009055	GO:0005576	GO:0005515	GO:0051536	GO:0008152	GO:0016747	GO:0006952	GO:0004872	GO:0005488	GO:0007155	GO:0007160	GO:0007229	GO:0008305	GO:0005525	GO:0005874	GO:0007017
2.0_INSECT_GG3J73P03FQI1O	GO:0008152	GO:0016747	GO:0005515
2.0_INSECT_GG3J73P03FQIDU	GO:0008152	GO:0016747	GO:0009055	GO:0051536	GO:0005515	GO:0005576	GO:0006952	GO:0004872	GO:0005488	GO:0007155	GO:0007160	GO:0007229	GO:0008305	GO:0016068
2.0_INSECT_GG3J73P03FQJ6L	GO:0009055	GO:0005515
2.0_INSECT_GG3J73P03FQJ8Y	GO:0009055	GO:0005576	GO:0005515
2.0_INSECT_GG3J73P03FQJCY	GO:0009055	GO:0051536	GO:0005576	GO:0005515	GO:0008152	GO:0016747	GO:0005525	GO:0005874	GO:0007017	GO:0004872	GO:0005488	GO:0007155	GO:0007160	GO:0007229	GO:0008305	GO:0006952	GO:0046872
2.0_INSECT_GG3J73P03FQJYR	GO:0009055	GO:0005515	GO:0008152	GO:0016747
2.0_INSECT_GG3J73P03FQKAZ	GO:0005515	GO:0005525	GO:0005874	GO:0007017	GO:0009055	GO:0051536	GO:0008152	GO:0016747	GO:0004872	GO:0005488	GO:0007155	GO:0007160	GO:0007229	GO:0008305	GO:0005576	GO:0006952
2.0_INSECT_GG3J73P03FQMF9	GO:0008152	GO:0016747
2.0_INSECT_GG3J73P03FQMSE	GO:0009055	GO:0051536	GO:0008152	GO:0016747	GO:0005515	GO:0005525	GO:0005874	GO:0007017	GO:0005199	GO:0009277	GO:0005576	GO:0004872	GO:0005488	GO:0007155	GO:0007160	GO:0007229	GO:0008305	GO:0006952
2.0_INSECT_GG3J73P03FQNRX	GO:0009055	GO:0051536	GO:0005576	GO:0005515	GO:0004872	GO:0005488	GO:0007155	GO:0007160	GO:0007229	GO:0008305	GO:0008152	GO:0016747	GO:0006952	GO:0005525	GO:0005874	GO:0007017
2.0_INSECT_GG3J73P03FQO0N	GO:0009055	GO:0051536	GO:0005515	GO:0005576	GO:0008152	GO:0016747	GO:0006952	GO:0004872	GO:0005488	GO:0007155	GO:0007160	GO:0007229	GO:0008305	GO:0005199	GO:0009277
2.0_INSECT_GG3J73P03FQOKS	GO:0008152	GO:0016747	GO:0005515	GO:0009055	GO:0005576	GO:0051536	GO:0004872	GO:0005488	GO:0007155	GO:0007160	GO:0007229	GO:0008305	GO:0006952	GO:0005199	GO:0009277
2.0_INSECT_GG3J73P03FQOOD	GO:0009055	GO:0005576	GO:0006952	GO:0005515	GO:0051536	GO:0008152	GO:0016747	GO:0005525	GO:0005874	GO:0007017	GO:0042309	GO:0050825	GO:0050826	GO:0004872	GO:0005488	GO:0007155	GO:0007160	GO:0007229	GO:0008305
2.0_INSECT_GG3J73P03FQOQV	GO:0009055	GO:0051536	GO:0005576	GO:0006952	GO:0005515	GO:0008152	GO:0016747	GO:0005525	GO:0005874	GO:0007017	GO:0004872	GO:0005488	GO:0007155	GO:0007160	GO:0007229	GO:0008305	GO:0016068
2.0_INSECT_GG3J73P03FQP2L	GO:0009055	GO:0004872	GO:0005488	GO:0007155	GO:0007160	GO:0007229	GO:0008305	GO:0005576	GO:0005515	GO:0008152	GO:0016747
2.0_INSECT_GG3J73P03FQP6L	GO:0009055	GO:0005515	GO:0051536	GO:0005576	GO:0005199	GO:0009277	GO:0006952	GO:0004872	GO:0005488	GO:0007155	GO:0007160	GO:0007229	GO:0008305	GO:0001558	GO:0005520	GO:0008152	GO:0016747
2.0_INSECT_GG3J73P03FQPG8	GO:0009055	GO:0051536	GO:0005515	GO:0008152	GO:0016747	GO:0004872	GO:0005488	GO:0007155	GO:0007160	GO:0007229	GO:0008305	GO:0005576	GO:0009755	GO:0006952	GO:0005525	GO:0005874	GO:0007017
2.0_INSECT_GG3J73P03FQPQO	GO:0005576	GO:0005515	GO:0008152	GO:0016747	GO:0005525	GO:0005874	GO:0007017	GO:0009055	GO:0051536	GO:0006952	GO:0005199	GO:0009277	GO:0004872	GO:0005488	GO:0007155	GO:0007160	GO:0007229	GO:0008305
2.0_INSECT_GG3J73P03FQPRY	GO:0008152	GO:0016747	GO:0009055	GO:0051536	GO:0005576	GO:0006952	GO:0005515	GO:0009755	GO:0004872	GO:0005488	GO:0007155	GO:0007160	GO:0007229	GO:0008305
2.0_INSECT_GG3J73P03FQQ2M	GO:0009055
2.0_INSECT_GG3J73P03FQQ7D	GO:0009055	GO:0051536	GO:0005515
2.0_INSECT_GG3J73P03FQQTC	GO:0008152	GO:0016747	GO:0009055
2.0_INSECT_GG3J73P03FQQXR	GO:0009055	GO:0051536	GO:0005576	GO:0006952	GO:0005515	GO:0005525	GO:0005874	GO:0007017	GO:0004872	GO:0005488	GO:0007155	GO:0007160	GO:0007229	GO:0008305	GO:0008152	GO:0016747
2.0_INSECT_GG3J73P03FQR6K	GO:0005515
2.0_INSECT_GG3J73P03FQR7O	GO:0009055	GO:0051536	GO:0005576	GO:0006952	GO:0005515	GO:0004872	GO:0005488	GO:0007155	GO:0007160	GO:0007229	GO:0008305	GO:0016068	GO:0008152	GO:0016747	GO:0005525	GO:0005874	GO:0007017
2.0_INSECT_GG3J73P03FQRNP	GO:0008152	GO:0016747
2.0_INSECT_GG3J73P03FQSBG	GO:0009055	GO:0005576	GO:0005515	GO:0005525	GO:0005874	GO:0007017
2.0_INSECT_GG3J73P03FQTPK	GO:0009055
2.0_INSECT_GG3J73P03FQUZN	GO:0008152	GO:0016747	GO:0004872	GO:0005488	GO:0007155	GO:0007160	GO:0007229	GO:0008305	GO:0009055	GO:0051536	GO:0005576	GO:0005515	GO:0006952
2.0_INSECT_GG3J73P03FQV41	GO:0009055	GO:0051536	GO:0005576	GO:0006952	GO:0005515	GO:0008152	GO:0016747	GO:0005525	GO:0005874	GO:0007017	GO:0004872	GO:0005488	GO:0007155	GO:0007160	GO:0007229	GO:0008305	GO:0005199	GO:0009277
2.0_INSECT_GG3J73P03FQVCY	GO:0009055
2.0_INSECT_GG3J73P03FQW6T	GO:0009055	GO:0005515	GO:0005525	GO:0005874	GO:0007017	GO:0008152	GO:0016747	GO:0005576	GO:0006952	GO:0004872	GO:0005488	GO:0007155	GO:0007160	GO:0007229	GO:0008305
2.0_INSECT_GG3J73P03FQXH4	GO:0009055	GO:0051536	GO:0004872	GO:0005488	GO:0007155	GO:0007160	GO:0007229	GO:0008305	GO:0005576	GO:0006952	GO:0005515	GO:0008152	GO:0016747	GO:0046872
2.0_INSECT_GG3J73P03FQYXI	GO:0009055	GO:0051536	GO:0005576	GO:0005515	GO:0008152	GO:0016747	GO:0004872	GO:0005488	GO:0007155	GO:0007160	GO:0007229	GO:0008305	GO:0006952	GO:0005525	GO:0005874	GO:0007017
2.0_INSECT_GG3J73P03FQZCU	GO:0009055	GO:0005576	GO:0005515
2.0_INSECT_GG3J73P03FQZGD	GO:0008152	GO:0016747	GO:0005576
2.0_INSECT_GG3J73P03FQZKG	GO:0009055	GO:0051536	GO:0004872	GO:0005488	GO:0007155	GO:0007160	GO:0007229	GO:0008305	GO:0005576	GO:0008152	GO:0016747	GO:0005515	GO:0006952	GO:0005525	GO:0005874	GO:0007017
2.0_INSECT_GG3J73P03FQZWZ	GO:0009055	GO:0051536	GO:0004872	GO:0005488	GO:0007155	GO:0007160	GO:0007229	GO:0008305	GO:0005576	GO:0005515	GO:0008152	GO:0016747	GO:0006952	GO:0016068
2.0_INSECT_GG3J73P03FR0HL	GO:0008152	GO:0016747
2.0_INSECT_GG3J73P03FR0QD	GO:0009055	GO:0051536	GO:0005576	GO:0006952	GO:0005515	GO:0008152	GO:0016747	GO:0005525	GO:0005874	GO:0007017	GO:0009755	GO:0004872	GO:0005488	GO:0007155	GO:0007160	GO:0007229	GO:0008305
2.0_INSECT_GG3J73P03FR0W8	GO:0009055	GO:0005576	GO:0005515
2.0_INSECT_GG3J73P03FR2C0	GO:0005515
2.0_INSECT_GG3J73P03FR2E9	GO:0005576	GO:0008152	GO:0016747
2.0_INSECT_GG3J73P03FR2EY	GO:0009055	GO:0005576
2.0_INSECT_GG3J73P03FR3KA	GO:0009055	GO:0005515	GO:0008152	GO:0016747	GO:0005576	GO:0051536	GO:0004872	GO:0005488	GO:0007155	GO:0007160	GO:0007229	GO:0008305	GO:0006952
2.0_INSECT_GG3J73P03FR41Q	GO:0005515	GO:0016068
2.0_INSECT_GG3J73P03FR4W7	GO:0009055	GO:0005515	GO:0051536	GO:0005576	GO:0006952
2.0_INSECT_GG3J73P03FR5FU	GO:0009055	GO:0005576	GO:0005515	GO:0008152	GO:0016747	GO:0051536	GO:0005525	GO:0005874	GO:0007017	GO:0004872	GO:0005488	GO:0007155	GO:0007160	GO:0007229	GO:0008305	GO:0006952
2.0_INSECT_GG3J73P03FR6GK	GO:0008152	GO:0016747	GO:0009055	GO:0005515	GO:0051536	GO:0005576	GO:0006952	GO:0005525	GO:0005874	GO:0007017	GO:0004872	GO:0005488	GO:0007155	GO:0007160	GO:0007229	GO:0008305
2.0_INSECT_GG3J73P03FR6K2	GO:0008152	GO:0016747	GO:0009055	GO:0051536	GO:0005576	GO:0005515
2.0_INSECT_GG3J73P03FR6R7	GO:0009055	GO:0005576	GO:0005515	GO:0051536
2.0_INSECT_GG3J73P03FR7OB	GO:0008152	GO:0016747	GO:0009055	GO:0051536	GO:0005515	GO:0005576
2.0_INSECT_GG3J73P03FR8AY	GO:0008152	GO:0016747	GO:0009055	GO:0005576	GO:0006952	GO:0005515	GO:0051536	GO:0046872
2.0_INSECT_GG3J73P03FR8YD	GO:0009055	GO:0005576	GO:0008152	GO:0016747	GO:0005515	GO:0016068	GO:0006952
2.0_INSECT_GG3J73P03FR9EF	GO:0009055	GO:0005515	GO:0008152	GO:0016747	GO:0005576	GO:0004872	GO:0005488	GO:0007155	GO:0007160	GO:0007229	GO:0008305	GO:0006952	GO:0051536
2.0_INSECT_GG3J73P03FR9TX	GO:0009055	GO:0051536	GO:0005576	GO:0005515	GO:0009755	GO:0005525	GO:0005874	GO:0007017	GO:0008152	GO:0016747	GO:0004872	GO:0005488	GO:0007155	GO:0007160	GO:0007229	GO:0008305
2.0_INSECT_GG3J73P03FRA07	GO:0009055	GO:0005515	GO:0008152	GO:0016747	GO:0005576	GO:0051536	GO:0006952	GO:0016068
2.0_INSECT_GG3J73P03FRBZD	GO:0005515	GO:0009055	GO:0051536	GO:0005576	GO:0006952	GO:0008152	GO:0016747	GO:0004872	GO:0005488	GO:0007155	GO:0007160	GO:0007229	GO:0008305
2.0_INSECT_GG3J73P03FRC3C	GO:0009055	GO:0005576	GO:0005515
2.0_INSECT_GG3J73P03FRCQM	GO:0009055	GO:0005515	GO:0008152	GO:0016747	GO:0004872	GO:0005488	GO:0007155	GO:0007160	GO:0007229	GO:0008305	GO:0005576	GO:0006952
2.0_INSECT_GG3J73P03FRCTM	GO:0009055	GO:0005515	GO:0051536	GO:0004872	GO:0005488	GO:0007155	GO:0007160	GO:0007229	GO:0008305	GO:0005576	GO:0008152	GO:0016747	GO:0005525	GO:0005874	GO:0007017	GO:0016068	GO:0006952
2.0_INSECT_GG3J73P03FRCTW	GO:0009055	GO:0051536	GO:0008152	GO:0016747	GO:0005576	GO:0006952	GO:0005515	GO:0005525	GO:0005874	GO:0007017	GO:0004872	GO:0005488	GO:0007155	GO:0007160	GO:0007229	GO:0008305
2.0_INSECT_GG3J73P03FRCZ4	GO:0009055	GO:0005515	GO:0004872	GO:0005488	GO:0007155	GO:0007160	GO:0007229	GO:0008305	GO:0005576	GO:0008152	GO:0016747	GO:0016068	GO:0006952	GO:0051536	GO:0005525	GO:0005874	GO:0007017
2.0_INSECT_GG3J73P03FRD6T	GO:0009055	GO:0051536	GO:0005515	GO:0005525	GO:0005874	GO:0007017	GO:0005576	GO:0006952	GO:0008152	GO:0016747	GO:0016068	GO:0003735	GO:0005622	GO:0005840	GO:0006412	GO:0004872	GO:0005488	GO:0007155	GO:0007160	GO:0007229	GO:0008305
2.0_INSECT_GG3J73P03FRDYX	GO:0008152	GO:0016747	GO:0009055	GO:0005576	GO:0005515	GO:0004872	GO:0005488	GO:0007155	GO:0007160	GO:0007229	GO:0008305	GO:0006952	GO:0005525	GO:0005874	GO:0007017
2.0_INSECT_GG3J73P03FREQK	GO:0009055	GO:0051536	GO:0005515
2.0_INSECT_GG3J73P03FREQZ	GO:0005576	GO:0009055	GO:0005515	GO:0008152	GO:0016747
2.0_INSECT_GG3J73P03FRF3F	GO:0005515	GO:0009055	GO:0051536	GO:0005576	GO:0006952	GO:0008152	GO:0016747	GO:0005525	GO:0005874	GO:0007017	GO:0004872	GO:0005488	GO:0007155	GO:0007160	GO:0007229	GO:0008305
2.0_INSECT_GG3J73P03FRFFZ	GO:0009055	GO:0051536	GO:0005576	GO:0006952	GO:0005515	GO:0004872	GO:0005488	GO:0007155	GO:0007160	GO:0007229	GO:0008305	GO:0005199	GO:0009277	GO:0008152	GO:0016747	GO:0005525	GO:0005874	GO:0007017	GO:0016068
2.0_INSECT_GG3J73P03FRG7O	GO:0008152	GO:0016747	GO:0005515
2.0_INSECT_GG3J73P03FRGEZ	GO:0009055	GO:0005525	GO:0005874	GO:0007017	GO:0008152	GO:0016747	GO:0051536	GO:0016068	GO:0004872	GO:0005488	GO:0007155	GO:0007160	GO:0007229	GO:0008305	GO:0005576	GO:0005515	GO:0009755	GO:0046872	GO:0006952
2.0_INSECT_GG3J73P03FRHSP	GO:0009055	GO:0005576	GO:0005515	GO:0051536	GO:0006952	GO:0009755	GO:0008152	GO:0016747	GO:0016068	GO:0004872	GO:0005488	GO:0007155	GO:0007160	GO:0007229	GO:0008305
2.0_INSECT_GG3J73P03FRHU5	GO:0009055	GO:0005515	GO:0005576	GO:0051536	GO:0008152	GO:0016747
2.0_INSECT_GG3J73P03FRI8Y	GO:0009055	GO:0051536	GO:0005576	GO:0006952	GO:0005515	GO:0004872	GO:0008152	GO:0016747	GO:0005488	GO:0007155	GO:0007160	GO:0007229	GO:0008305	GO:0005525	GO:0005874	GO:0007017
2.0_INSECT_GG3J73P03FRIHD	GO:0008152	GO:0016747	GO:0009055	GO:0005515	GO:0004872	GO:0005488	GO:0007155	GO:0007160	GO:0007229	GO:0008305	GO:0005576	GO:0051536	GO:0005525	GO:0005874	GO:0007017
2.0_INSECT_GG3J73P03FRILG	GO:0005576	GO:0005515	GO:0009055
2.0_INSECT_GG3J73P03FRISE	GO:0009055	GO:0005576	GO:0006952	GO:0005515	GO:0005525	GO:0005874	GO:0007017	GO:0004872	GO:0005488	GO:0007155	GO:0007160	GO:0007229	GO:0008305	GO:0008152	GO:0016747	GO:0051536	GO:0009755
2.0_INSECT_GG3J73P03FRIYU	GO:0005576	GO:0005515	GO:0009055	GO:0004872	GO:0005488	GO:0007155	GO:0007160	GO:0007229	GO:0008305	GO:0006952	GO:0051536	GO:0008152	GO:0016747	GO:0005525	GO:0005874	GO:0007017	GO:0016068
2.0_INSECT_GG3J73P03FRJ8E	GO:0008152	GO:0016747	GO:0009055	GO:0005576	GO:0006952	GO:0005515	GO:0051536	GO:0005525	GO:0005874	GO:0007017	GO:0016068	GO:0004872	GO:0005488	GO:0007155	GO:0007160	GO:0007229	GO:0008305
2.0_INSECT_GG3J73P03FRJ9Q	GO:0009055
2.0_INSECT_GG3J73P03FRJGF	GO:0008152	GO:0016747	GO:0009055	GO:0005576	GO:0051536	GO:0006952	GO:0005515	GO:0009755
2.0_INSECT_GG3J73P03FRKAO	GO:0009055	GO:0005576	GO:0006952	GO:0008152	GO:0016747	GO:0005515	GO:0051536	GO:0004872	GO:0005488	GO:0007155	GO:0007160	GO:0007229	GO:0008305	GO:0005525	GO:0005874	GO:0007017	GO:0042309	GO:0050825	GO:0050826
2.0_INSECT_GG3J73P03FRLF7	GO:0009055	GO:0005515	GO:0005576
2.0_INSECT_GG3J73P03FRMET	GO:0009055	GO:0008152	GO:0016747	GO:0051536	GO:0005525	GO:0005874	GO:0007017	GO:0004872	GO:0005488	GO:0007155	GO:0007160	GO:0007229	GO:0008305	GO:0005515
2.0_INSECT_GG3J73P03FRMFW	GO:0008152	GO:0016747	GO:0009055	GO:0051536	GO:0005515	GO:0005576	GO:0006952	GO:0004872	GO:0005488	GO:0007155	GO:0007160	GO:0007229	GO:0008305	GO:0005525	GO:0005874	GO:0007017
2.0_INSECT_GG3J73P03FRMHN	GO:0009055
2.0_INSECT_GG3J73P03FRNY0	GO:0009055	GO:0005515	GO:0005525	GO:0005874	GO:0007017	GO:0008152	GO:0016747
2.0_INSECT_GG3J73P03FROGC	GO:0008152	GO:0016747	GO:0009055
2.0_INSECT_GG3J73P03FROLV	GO:0008152	GO:0016747	GO:0009055	GO:0051536	GO:0005576	GO:0005515	GO:0005199	GO:0009277	GO:0005525	GO:0005874	GO:0007017	GO:0004872	GO:0005488	GO:0007155	GO:0007160	GO:0007229	GO:0008305	GO:0046872
2.0_INSECT_GG3J73P03FROS5	GO:0005515	GO:0008152	GO:0016747	GO:0009055	GO:0051536	GO:0005576	GO:0004872	GO:0005488	GO:0007155	GO:0007160	GO:0007229	GO:0008305	GO:0006952
2.0_INSECT_GG3J73P03FRPCU	GO:0009055	GO:0008152	GO:0016747	GO:0005515	GO:0051536	GO:0005576	GO:0004872	GO:0005488	GO:0007155	GO:0007160	GO:0007229	GO:0008305	GO:0006952	GO:0009755	GO:0046872
2.0_INSECT_GG3J73P03FRPFJ	GO:0005576	GO:0005515	GO:0009055	GO:0008152	GO:0016747	GO:0051536	GO:0006952	GO:0004872	GO:0005488	GO:0007155	GO:0007160	GO:0007229	GO:0008305	GO:0005525	GO:0005874	GO:0007017	GO:0009405	GO:0001558	GO:0005520
2.0_INSECT_GG3J73P03FRPTI	GO:0009055	GO:0051536	GO:0005576	GO:0005515	GO:0004872	GO:0005488	GO:0007155	GO:0007160	GO:0007229	GO:0008305	GO:0006952	GO:0046872	GO:0008152	GO:0016747
2.0_INSECT_GG3J73P03FRPX9	GO:0009055	GO:0051536	GO:0005525	GO:0005874	GO:0007017	GO:0005515	GO:0008152	GO:0016747	GO:0005576	GO:0009405	GO:0006952	GO:0004872	GO:0005488	GO:0007155	GO:0007160	GO:0007229	GO:0008305	GO:0009755
2.0_INSECT_GG3J73P03FRQL8	GO:0009055	GO:0005576	GO:0008152	GO:0016747
2.0_INSECT_GG3J73P03FRQLX	GO:0005525	GO:0005874	GO:0007017	GO:0005515
[truncated: 38,613 more rows]
[truncated: 3 more columns]
